# Supplementary material for: Controlling the repair mechanisms of oxetanes through functional group substitution
Source: Royal Society of Chemistry journal article supplement (doi:10.1039/d3cp01019h), 2023-01-01
Supplement: d3cp01019h1.pdf [file d3cp01019h1.pdf]

*Supporting Information for:*

**Controlling the Repair Mechanism of Oxetanes  
Through Functional Group Substitution**

Yan Shen,<sup>a</sup> Shaoqin Zhang,<sup>b</sup> Yingli Su,<sup>a</sup> Zexing Qu<sup>\*b</sup> and Haisheng Ren<sup>\*a</sup>

<sup>a</sup> School of Chemical Engineering, Sichuan University, Chengdu, 610065, China

<sup>b</sup> Institute of Theoretical Chemistry, College of Chemistry, Jilin University,  
Changchun, 130023, China

\* Corresponding author E-mail:

[zxqu@jlu.edu.cn](mailto:zxqu@jlu.edu.cn); [renhs@scu.edu.cn](mailto:renhs@scu.edu.cn)

**Table S1.** Properties of the main excited state geometries of HH-oxetanes involved in the photophysical processes, in which  $\lambda$  is the excitation wavelength (unit in nm) and  $f$  is the oscillator strength.

| Oxetane | $S_n$                             |           |        | $S_1$                            |           |        | $S_{1,\min}$                              |           |        | $T_{1,\min}$               |           |
|---------|-----------------------------------|-----------|--------|----------------------------------|-----------|--------|-------------------------------------------|-----------|--------|----------------------------|-----------|
|         | Nature                            | $\lambda$ | $f$    | Nature                           | $\lambda$ | $f$    | Nature                                    | $\lambda$ | $f$    | Nature                     | $\lambda$ |
| 1       | $^1(\pi_{A-T}\pi_{B-A}^*)$        | 224       | 0.0718 | $^1(n_T\pi_T^*/\pi_{CO}\pi_T^*)$ | 257       | 0.0011 | $^1(n_T\pi_T^*/\pi_{CO}\pi_T^*)$          | 343       | 0.0039 | $^3(\pi_A\pi_A^*)$         | 585       |
| 2       | $^1(\pi_{A-B}\pi_T^*/n_T\pi_T^*)$ | 221       | 0.0654 | $^1(\pi_A\pi_T^*/n_T\pi_T^*)$    | 286       | 0.0012 | $^1(n_T\pi_T^*/\pi_{CO}\pi_T^*)$          | 344       | 0.0034 | $^3(\pi_A\pi_A^*)$         | 852       |
| 3       | $^1(\pi_A\pi_{A-B}^*)$            | 243       | 0.0504 | $^1(\pi_A\pi_T^*)$               | 319       | 0.0113 | $^1(\pi_A\pi_T^*)$                        | 378       | 0.0042 | $^3(\pi_A\pi_A^*)$         | 679       |
| 4       | $^1(\pi_B\pi_{A-B-T}^*)$          | 237       | 0.0309 | $^1(\pi_{B-A}\pi_{NO2}^*)$       | 390       | 0.0039 | $^1(\pi_A\pi_{NO2}^*/n_{NO2}\pi_{NO2}^*)$ | 733       | 0.0002 | $^3(\pi_{NO2}\pi_{NO2}^*)$ | 1148      |
| 5       | $^1(\pi_{A-T}\pi_T^*)$            | 247       | 0.0361 | $^1(\pi_B\pi_T^*)$               | 288       | 0.0016 | $^1(\pi_B\pi_T^*/n_T\pi_T^*)$             | 343       | 0.0097 | $^3(\pi_A\pi_A^*)$         | 579       |
| 6       | $^1(\pi_{A-B-T}\pi_T^*)$          | 246       | 0.0338 | $^1(\pi_B\pi_T^*)$               | 321       | 0.0022 | $^1(\pi_B\pi_T^*)$                        | 377       | 0.0302 | $^3(\pi_A\pi_A^*)$         | 580       |
| 7       | $^1(\pi_{B-T}\pi_B^*)$            | 275       | 0.1535 | $^1(\pi_A\pi_B^*)$               | 475       | 0.0029 | $^1(\pi_{A-T}\pi_B^*)$                    | 525       | 0.0058 | $^3(\pi_{NO2}\pi_B^*)$     | 859       |

**Table S2.** Properties of the main excited state geometries of HT-oxetanes involved in the photophysical processes, in which  $\lambda$  is the excitation wavelength (unit in nm) and  $f$  is the oscillator strength.

| Oxetane | $S_n$                              |           |        | $S_1$                  |           |        | $S_{1,min}$                                      |           |        | $T_{1,min}$               |           |
|---------|------------------------------------|-----------|--------|------------------------|-----------|--------|--------------------------------------------------|-----------|--------|---------------------------|-----------|
|         | Nature                             | $\lambda$ | $f$    | Nature                 | $\lambda$ | $f$    | Nature                                           | $\lambda$ | $f$    | Nature                    | $\lambda$ |
| 1       | $^1(\pi_{B-A}\pi_{A-B-T}^*)$       | 224       | 0.0332 | $^1(\pi_{B-A}\pi_T^*)$ | 275       | 0.0040 | $^1(\pi_{B-A}\pi_T^*)$                           | 336       | 0.0150 | $^3(\pi_A\pi_A^*)$        | 657       |
| 2       | $^1(\pi_A\pi_{COO}^*)$             | 214       | 0.0267 | $^1(\pi_{A-B}\pi_T^*)$ | 282       | 0.0177 | $^1(\pi_{A-B}\pi_T^*)$                           | 342       | 0.0370 | $^3(\pi_A\pi_A^*)$        | 797       |
| 3       | $^1(\pi_A\pi_{B-A}^*)$             | 251       | 0.0408 | $^1(\pi_A\pi_T^*)$     | 311       | 0.0130 | $^1(\pi_A\pi_T^*)$                               | 374       | 0.0403 | $^3(\pi_A\pi_A^*)$        | 722       |
| 4       | $^1(\pi_A\pi_A^*/n_{NO_2}\pi_A^*)$ | 261       | 0.1189 | $^1(\pi_B\pi_A^*)$     | 437       | 0.0038 | $^1(\pi_{A-B}\pi_{NO_2}^*/n_{NO_2}\pi_{NO_2}^*)$ | 718       | 0.0009 | $^3(\pi_{B-NO_2}\pi_A^*)$ | 1036      |
| 5       | $^1(\pi_B\pi_{A-B}^*)$             | 236       | 0.0481 | $^1(\pi_B\pi_T^*)$     | 291       | 0.0026 | $^1(\pi_{B-A}\pi_T^*)$                           | 351       | 0.0101 | $^3(\pi_A\pi_A^*)$        | 657       |
| 6       | $^1(\pi_B\pi_A^*)$                 | 257       | 0.0434 | $^1(\pi_B\pi_T^*)$     | 323       | 0.0013 | $^1(\pi_B\pi_T^*)$                               | 391       | 0.0056 | $^3(\pi_A\pi_A^*)$        | 650       |
| 7       | $^1(\pi_B\pi_B^*/n_T\pi_B^*)$      | 274       | 0.2514 | $^1(\pi_A\pi_B^*)$     | 463       | 0.0222 | $^1(\pi_A\pi_B^*)$                               | 468       | 0.0455 | $^3(\pi_{NO_2}\pi_B^*)$   | 865       |

**Table S3.** Properties of the main excited state geometries of products involved in the photophysical processes, in which  $\lambda$  is the excitation wavelength (unit in nm) and  $f$  is the oscillator strength.

| Product | $S_n$                            |           |        | $S_1$                   |           |         | $S_{1,\min}$                  |           |         | $T_{1,\min}$                                 |           |
|---------|----------------------------------|-----------|--------|-------------------------|-----------|---------|-------------------------------|-----------|---------|----------------------------------------------|-----------|
|         | Nature                           | $\lambda$ | $f$    | Nature                  | $\lambda$ | $f$     | Nature                        | $\lambda$ | $f$     | Nature                                       | $\lambda$ |
| 1       | $^1(\pi_{A-B}\pi_{A-B}^*)$       | 269       | 0.2435 | $^1(n_{CO}\pi_{A-B}^*)$ | 338       | 0.0011  | $^1(\pi_B\pi_A^*)$            | 480       | 0.0002  | $^3(n_{CO}\pi_{A-B}^*/\pi_{A-B}\pi_{A-E}^*)$ | 512       |
| 2       | $^1(\pi_T\pi_T^*)$               | 251       | 0.1850 | $^1(n_{CO}\pi_{B-A}^*)$ | 338       | 0.0016  | $^1(\pi_B\pi_A^*)$            | 485       | 0.0001  | $^3(n_{CO}\pi_{A-B}^*/\pi_B\pi_{A-B}^*)$     | 528       |
| 3       | $^1(\pi_T\pi_T^*)$               | 237       | 0.1771 | $^1(\pi_A\pi_B^*)$      | 385       | 0.0257  | $^1(n_{CO-OCH_3}\pi_{A-B}^*)$ | 545       | 0.0038  | $^3(n_{CO}\pi_{A-B}^*/\pi_B\pi_{A-B}^*)$     | 557       |
| 4       | $^1(\pi_B\pi_A^*)$               | 254       | 0.0110 | $^1(\pi_T\pi_A^*)$      | 662       | 1.2E-06 | $^1(n_{CO-NO_2}\pi_A^*)$      | 998       | 0.0003  | $^3(\pi_{NO_2}\pi_A^*)$                      | 1152      |
| 5       | $^1(\pi_{B-A}\pi_{A-B}^*)$       | 278       | 0.2034 | $^1(n_{CO}\pi_{A-B}^*)$ | 336       | 0.0016  | $^1(\pi_B\pi_A^*)$            | 505       | 0.0002  | $^3(\pi_B\pi_{A-B}^*)$                       | 527       |
| 6       | $^1(\pi_B\pi_{A-B}^*)$           | 300       | 0.3230 | $^1(n_{CO}\pi_{A-B}^*)$ | 334       | 0.0074  | $^1(\pi_B\pi_A^*)$            | 544       | 0.0002  | $^3(\pi_B\pi_{A-B}^*)$                       | 550       |
| 7       | $^1(n_{CO}\pi_B^*/\pi_A\pi_B^*)$ | 271       | 0.0186 | $^1(\pi_T\pi_B^*)$      | 776       | 5.7E-07 | $^1(n_{NO_2}\pi_B^*)$         | 619       | 9.5E-06 | $^3(n_{NO_2}\pi_B^*)$                        | 814       |

**Table S4.** The NTO analyses for  $S_1$  and  $T_1$  states at the  $S_{1,\min}$  geometries of HH-oxetanes

| Oxetane | State | Nature                                     | Hole                                                                                 | Electron                                                                              |
|---------|-------|--------------------------------------------|--------------------------------------------------------------------------------------|---------------------------------------------------------------------------------------|
| 1       | $S_1$ | $^1(n_T\pi_T^*/\pi_{CO}\pi_T^*)$<br>99.60% | 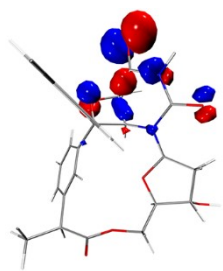   |    |
|         | $T_1$ | $^3(n_T\pi_T^*/\pi_{CO}\pi_T^*)$<br>99.20% |    |    |
| 2       | $S_1$ | $^1(n_T\pi_T^*/\pi_{CO}\pi_T^*)$<br>99.60% |  |  |
|         | $T_1$ | $^3(n_T\pi_T^*/\pi_{CO}\pi_T^*)$<br>99.20% |  |  |
| 3       | $S_1$ | $^1(\pi_A\pi_T^*)$<br>99.90%               |  |  |

| Oxetane | State          | Nature                                                                               | Hole | Electron |
|---------|----------------|--------------------------------------------------------------------------------------|------|----------|
| 4       | T <sub>1</sub> | ${}^3(\text{n}_T\pi_T^*/\pi_{\text{CO}}\pi_T^*)$<br>99.30%                           |      |          |
|         | S <sub>1</sub> | ${}^1(\pi_A\pi_{\text{NO}_2}^*/\text{n}_{\text{NO}_2}\pi_{\text{NO}_2}^*)$<br>99.90% |      |          |
|         | T <sub>1</sub> | ${}^3(\pi_{\text{NO}_2}\pi_{\text{NO}_2}^*)$<br>99.30%                               |      |          |
|         | S <sub>1</sub> | ${}^1(\pi_B\pi_T^*/\text{n}_T\pi_T^*)$<br>99.50%                                     |      |          |
| 5       | T <sub>1</sub> | ${}^3(\text{n}_T\pi_T^*/\pi_{\text{CO}}\pi_T^*)$<br>99.20%                           |      |          |
|         | S <sub>1</sub> | ${}^1(\pi_B\pi_T^*)$<br>99.60%                                                       |      |          |

| Oxetane | State | Nature                                       | Hole                                                                                | Electron                                                                             |
|---------|-------|----------------------------------------------|-------------------------------------------------------------------------------------|--------------------------------------------------------------------------------------|
|         | $T_1$ | ${}^3(n_T\pi_T^*/\pi_{CO}\pi_T^*)$<br>99.20% | 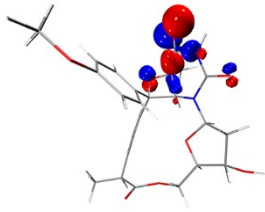  |   |
| 7       | $S_1$ | ${}^1(\pi_A - \pi_B^*)$<br>99.90%            |   |   |
|         | $T_1$ | ${}^3(\pi_{NO_2}\pi_B^*)$<br>98.10%          |  |  |

**Table S5.** The NTO analyses for  $S_1$  and  $T_1$  states at the  $S_{1,\min}$  geometries of HT-oxetanes

| Oxetane | State | Nature                                   | Hole                                                                                 | Electron                                                                              |
|---------|-------|------------------------------------------|--------------------------------------------------------------------------------------|---------------------------------------------------------------------------------------|
| 1       | $S_1$ | ${}^1(\pi_{B-A}\pi_T^*)$<br>99.60%       |    |    |
|         | $T_1$ | ${}^3(\pi_{A-B}\pi_{A-T-B}^*)$<br>74.20% |    |    |
| 2       | $S_1$ | ${}^1(\pi_{A-B}\pi_T^*)$<br>99.20%       |  |  |
|         | $T_1$ | ${}^3(\pi_A\pi_{A-T}^*)$<br>86.00%       |  |  |
| 3       | $S_1$ | ${}^1(\pi_A\pi_T^*)$<br>99.20%           |  |  |



| Oxetane | State          | Nature                                                      | Hole                                                                                 | Electron                                                                              |
|---------|----------------|-------------------------------------------------------------|--------------------------------------------------------------------------------------|---------------------------------------------------------------------------------------|
|         | T <sub>1</sub> | $^3(\pi_A \pi_A^*)$<br>95.30%                               | 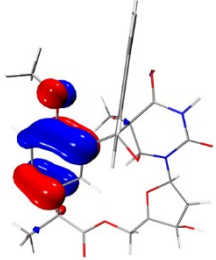   |    |
| 4       | S <sub>1</sub> | $^1(\pi_{A-B} \pi_{NO2}^* / n_{NO2} \pi_{NO2}^*)$<br>99.90% |    |    |
|         | T <sub>1</sub> | $^3(\pi_{NO2} \pi_{NO2}^*)$<br>99.30%                       |   |   |
| 5       | S <sub>1</sub> | $^1(\pi_{B-A} \pi_T^*)$<br>99.80%                           |  |  |
|         | T <sub>1</sub> | $^3(\pi_{B-A} \pi_{B-A}^*)$<br>70.90%                       |  |  |
| 6       | S <sub>1</sub> | $^1(\pi_B \pi_{T-A}^*)$<br>99.90%                           |  |  |

| Oxetane | State          | Nature                              | Hole                                                                                | Electron                                                                             |
|---------|----------------|-------------------------------------|-------------------------------------------------------------------------------------|--------------------------------------------------------------------------------------|
|         | T <sub>1</sub> | ${}^3(\pi_B\pi_{T-A}^*)$<br>95.30%  | 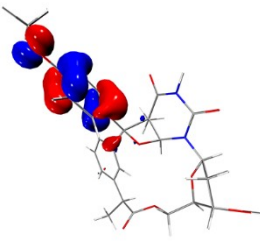  |   |
| 7       | S <sub>1</sub> | ${}^1(\pi_A\pi_B^*)$<br>99.60%      |   |   |
|         | T <sub>1</sub> | ${}^3(\pi_{NO_2}\pi_B^*)$<br>99.00% |  |  |

**Table S6.** The NTO analyses for  $S_1$  and  $T_1$  states at the  $S_{1,\min}$  geometries of products

| Product | State | Nature                                  | Hole                                                                                 | Electron                                                                              |
|---------|-------|-----------------------------------------|--------------------------------------------------------------------------------------|---------------------------------------------------------------------------------------|
| 1       | $S_1$ | $^1(\pi_B\pi_A^*)$<br>99.90%            | 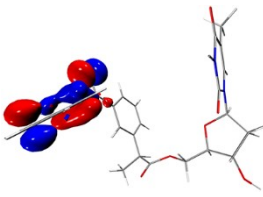   |    |
|         | $T_1$ | $^3(\pi_B\pi_A^*)$<br>99.40%            |    |    |
| 2       | $S_1$ | $^1(\pi_B\pi_A^*)$<br>99.90%            |   |   |
|         | $T_1$ | $^3(\pi_B\pi_A^*)$<br>99.40%            |  |  |
| 3       | $S_1$ | $^1(n_{CO-OCH_3}\pi_{A-B}^*)$<br>99.70% |  |  |
|         | $T_1$ | $^3(n_{CO-OCH_3}\pi_{A-B}^*)$<br>99.00% |  |  |
| 4       | $S_1$ | $^1(n_{CO-NO_2}\pi_A^*)$<br>99.50%      |  |  |

| Product | State          | Nature                                                                                  | Hole | Electron |
|---------|----------------|-----------------------------------------------------------------------------------------|------|----------|
|         | T <sub>1</sub> | <sup>3</sup> (n <sub>CO</sub> - NO <sub>2</sub> π <sub>A</sub> <sup>*</sup> )<br>97.20% |      |          |
| 5       | S <sub>1</sub> | <sup>1</sup> (π <sub>B</sub> π <sub>A</sub> <sup>*</sup> )<br>99.90%                    |      |          |
|         | T <sub>1</sub> | <sup>3</sup> (π <sub>B</sub> π <sub>A</sub> <sup>*</sup> )<br>99.40%                    |      |          |
| 6       | S <sub>1</sub> | <sup>1</sup> (π <sub>B</sub> π <sub>A</sub> <sup>*</sup> )<br>99.90%                    |      |          |
|         | T <sub>1</sub> | <sup>3</sup> (π <sub>B</sub> π <sub>A</sub> <sup>*</sup> )<br>99.30%                    |      |          |
| 7       | S <sub>1</sub> | <sup>1</sup> (n <sub>NO2</sub> π <sub>B</sub> <sup>*</sup> )<br>100.00%                 |      |          |
|         | T <sub>1</sub> | <sup>3</sup> (n <sub>NO2</sub> π <sub>B</sub> <sup>*</sup> )<br>99.50%                  |      |          |

**Table S7.** The dihedral angles among the A, B rings of BPs and the T ring at the  $S_{1,\min}$  geometries of HH-oxetanes (unit in degree).

| Oxetane | $\varphi_{A-B}$ | $\varphi_{A-T}$ | $\varphi_{B-T}$ |
|---------|-----------------|-----------------|-----------------|
| 1       | 66.07           | 36.05           | 60.23           |
| 2       | 69.30           | 34.98           | 57.75           |
| 3       | 67.94           | 60.84           | 68.21           |
| 4       | 64.17           | 52.21           | 55.17           |
| 5       | 63.04           | 34.92           | 56.52           |
| 6       | 64.74           | 42.76           | 65.56           |
| 7       | 62.21           | 27.60           | 52.70           |

**Table S8.** Fluorescence and phosphorescence radiation rate constants (unit in s<sup>-1</sup>) on the photophysical processes of oxetanes formed by BP derivatives.

| Regioisomer | Oxetane | $k_{\text{FL}}$    | $k_{\text{PH}}$    |
|-------------|---------|--------------------|--------------------|
| HH          | 2       | $6.23 \times 10^6$ | $1.33 \times 10^2$ |
|             | 3       | $3.71 \times 10^6$ | $2.92 \times 10^2$ |
|             | 4       | $1.95 \times 10^5$ | $4.61 \times 10^7$ |
|             | 5       | $1.05 \times 10^7$ | $1.79 \times 10^2$ |
|             | 6       | $2.09 \times 10^7$ | $8.47 \times 10^1$ |
|             | 7       | $1.32 \times 10^6$ | $2.41 \times 10^3$ |
|             | HT      | 2                  | $2.77 \times 10^7$ |
| 3           |         | $4.04 \times 10^7$ | $1.63 \times 10^2$ |
| 4           |         | $7.68 \times 10^5$ | $7.98 \times 10^3$ |
| 5           |         | $2.08 \times 10^7$ | $2.97 \times 10^2$ |
| 6           |         | $9.35 \times 10^6$ | $1.98 \times 10^2$ |
| 7           |         | $9.64 \times 10^6$ | $3.15 \times 10^3$ |

**Table S9.** Fluorescence and phosphorescence radiation rate constants rate constants (unit in  $\text{s}^{-1}$ ) on the photophysical processes of products formed by BP derivatives.

| Product | $k_{\text{FL}}$    | $k_{\text{PH}}$    |
|---------|--------------------|--------------------|
| 2       | $7.38 \times 10^4$ | $1.66 \times 10^3$ |
| 3       | $3.88 \times 10^6$ | $2.43 \times 10^3$ |
| 4       | $4.20 \times 10^5$ | $9.54 \times 10^3$ |
| 5       | $1.32 \times 10^5$ | $7.60 \times 10^2$ |
| 6       | $4.00 \times 10^5$ | $7.40 \times 10^2$ |
| 7       | $9.36 \times 10^3$ | $6.80 \times 10^3$ |

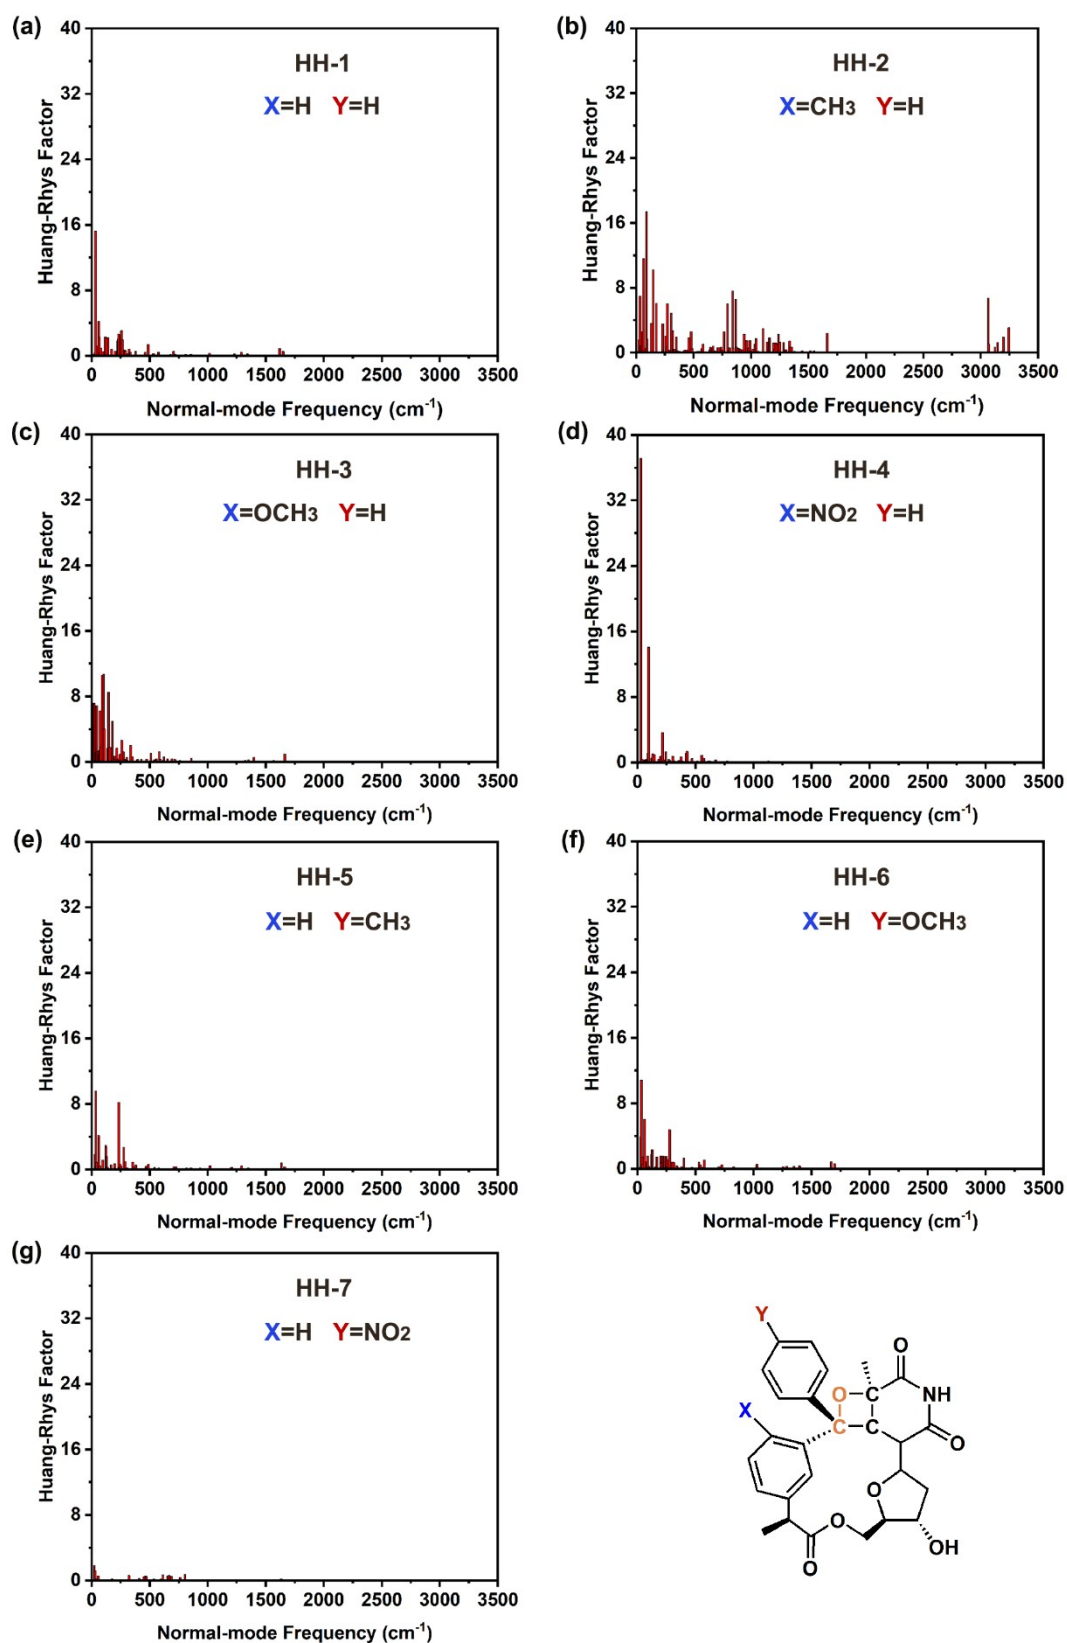

**Figure S1.** Huang-Rhys factors in ISC processes of HH-oxetanes formed by BPs and Thy.



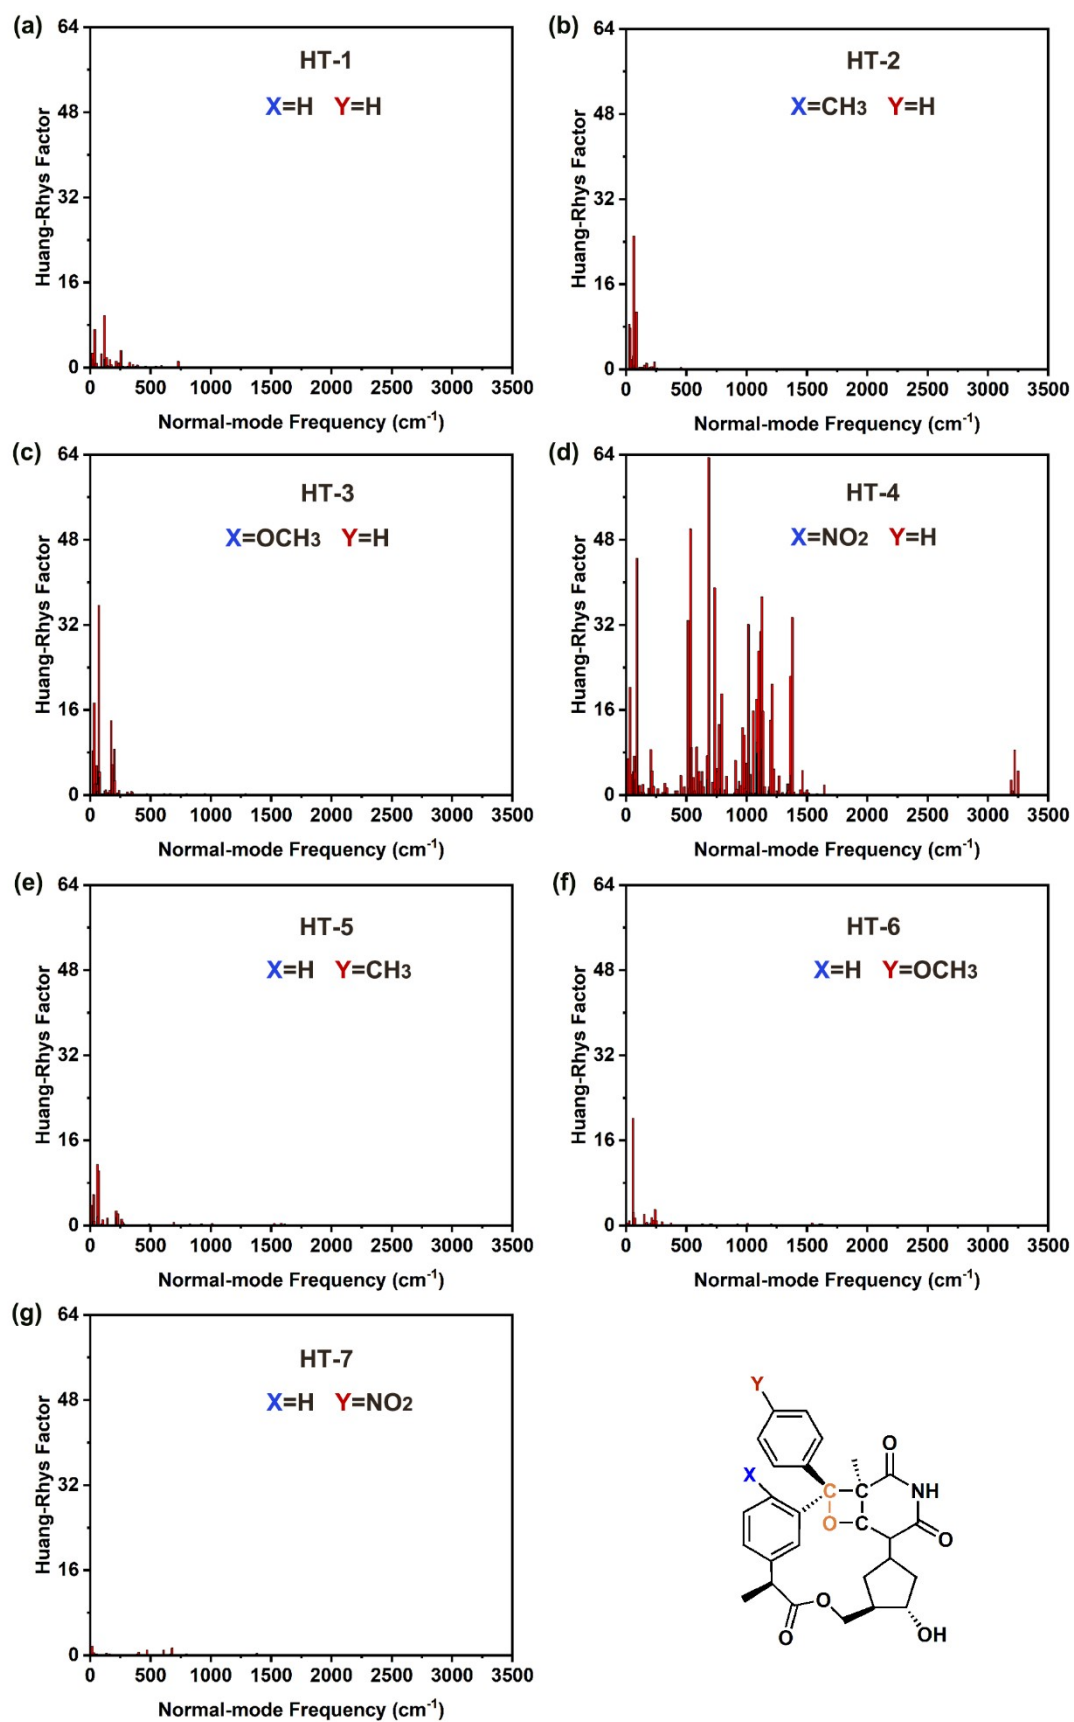

**Figure S2.** Huang-Rhys factors in ISC processes of HT-oxetanes formed by BPs and Thy.

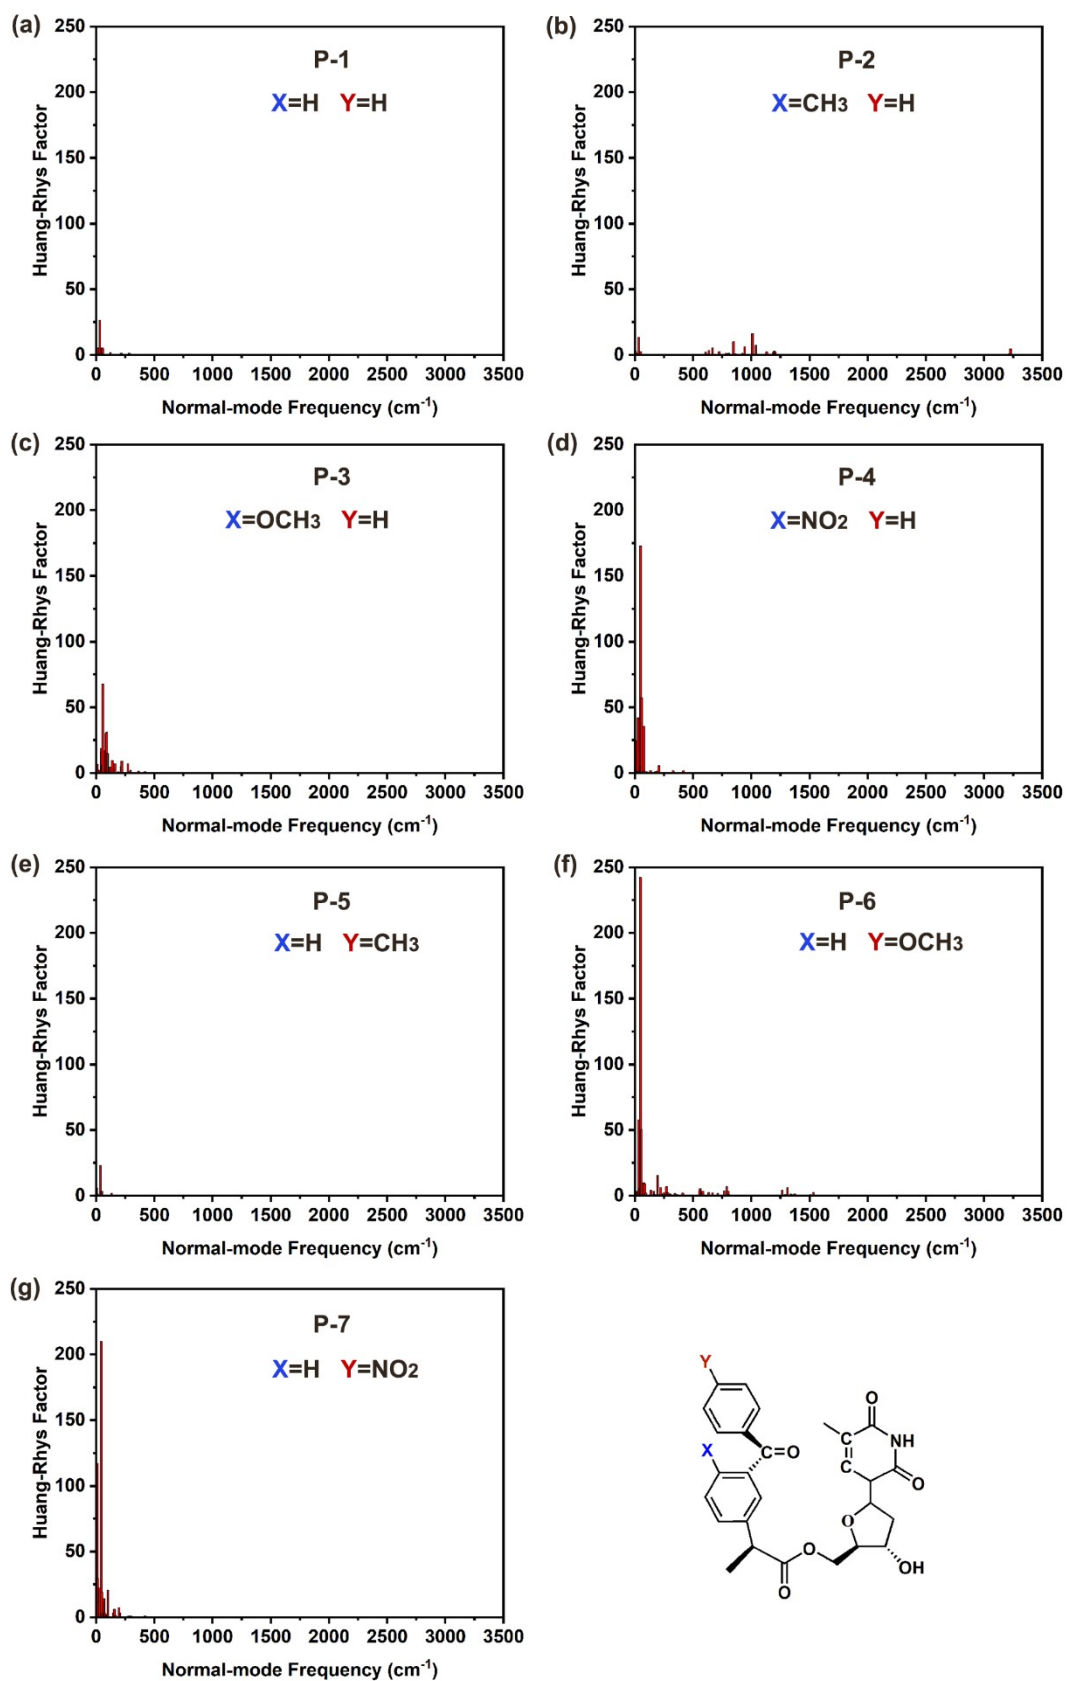

**Figure S3.** Huang-Rhys factors in ISC processes of products formed by BPs and Thy.

## Cartesian Coordinates

### HH-1-S<sub>0</sub>

|   |           |           |           |
|---|-----------|-----------|-----------|
| C | 4.557840  | -2.564527 | 0.775404  |
| H | 4.740168  | -3.455738 | 0.166610  |
| H | 5.494459  | -2.284016 | 1.268013  |
| H | 3.824884  | -2.818799 | 1.547789  |
| O | 3.503128  | 0.889431  | -0.126785 |
| C | 3.012646  | 2.110464  | 0.474338  |
| H | 2.695338  | 1.908234  | 1.499397  |
| H | 3.826299  | 2.842370  | 0.483506  |
| O | 0.800637  | 1.649625  | -0.364982 |
| C | 1.240466  | 3.944072  | 0.137835  |
| C | -0.234694 | 3.576188  | 0.405516  |
| H | 1.728899  | 4.299831  | 1.052562  |
| H | -0.909710 | 4.407486  | 0.196284  |
| H | -0.363893 | 3.272333  | 1.446151  |
| O | 1.406238  | 4.915307  | -0.901330 |
| H | 1.128664  | 5.782019  | -0.562058 |
| N | -1.510849 | 1.416724  | -0.284090 |
| C | -2.651006 | 1.748605  | 0.398889  |
| O | -2.814920 | 2.761483  | 1.071923  |
| N | -3.715785 | 0.828270  | 0.309450  |
| H | -4.503972 | 1.064300  | 0.906821  |
| C | 1.862380  | 2.619585  | -0.375313 |
| H | 2.199520  | 2.773758  | -1.409016 |
| C | -1.425061 | 0.197818  | -1.070876 |
| H | -0.796434 | 0.404922  | -1.937095 |
| O | -2.138429 | -1.796092 | -1.219460 |
| C | 4.043535  | -1.424668 | -0.119080 |
| H | 4.806083  | -1.200763 | -0.876886 |
| C | 2.757585  | -1.795917 | -0.858712 |
| C | 1.507055  | -1.493679 | -0.309981 |
| C | 2.809963  | -2.441412 | -2.101423 |
| C | 0.316898  | -1.749299 | -1.001339 |
| H | 1.460338  | -1.005678 | 0.656255  |
| C | 1.628076  | -2.758221 | -2.775644 |
| H | 3.771488  | -2.688495 | -2.546025 |
| C | 0.386408  | -2.398140 | -2.242469 |

### HH-1-S<sub>1,min</sub>

|   |           |           |           |
|---|-----------|-----------|-----------|
| C | 4.470577  | -2.652568 | 0.713533  |
| H | 4.641841  | -3.521818 | 0.070694  |
| H | 5.402277  | -2.422539 | 1.240507  |
| H | 3.711058  | -2.917181 | 1.456092  |
| O | 3.563246  | 0.869073  | -0.070120 |
| C | 3.082484  | 2.083542  | 0.552128  |
| H | 2.786978  | 1.872954  | 1.581871  |
| H | 3.897650  | 2.813483  | 0.548112  |
| O | 0.845811  | 1.641307  | -0.230306 |
| C | 1.319212  | 3.934810  | 0.242269  |
| C | -0.163485 | 3.594589  | 0.505288  |
| H | 1.811552  | 4.278359  | 1.159660  |
| H | -0.823637 | 4.433749  | 0.279818  |
| H | -0.304719 | 3.307161  | 1.548554  |
| O | 1.509973  | 4.905157  | -0.793580 |
| H | 1.252678  | 5.777186  | -0.452030 |
| N | -1.474652 | 1.451235  | -0.172814 |
| C | -2.615631 | 1.811375  | 0.521767  |
| O | -2.709126 | 2.806627  | 1.253314  |
| N | -3.712325 | 0.996695  | 0.355698  |
| H | -4.508595 | 1.259589  | 0.926264  |
| C | 1.916612  | 2.598889  | -0.271509 |
| H | 2.232381  | 2.743552  | -1.313715 |
| C | -1.438511 | 0.275037  | -1.013074 |
| H | -0.839288 | 0.507744  | -1.896079 |
| O | -2.143201 | -1.690285 | -1.348942 |
| C | 4.014302  | -1.459449 | -0.141774 |
| H | 4.800943  | -1.227061 | -0.871493 |
| C | 2.735450  | -1.755516 | -0.925651 |
| C | 1.481560  | -1.475970 | -0.372945 |
| C | 2.798086  | -2.309922 | -2.211592 |
| C | 0.299253  | -1.676586 | -1.094891 |
| H | 1.425727  | -1.055818 | 0.624516  |
| C | 1.623171  | -2.563959 | -2.922858 |
| H | 3.763313  | -2.536347 | -2.658896 |
| C | 0.377545  | -2.234437 | -2.379671 |

|   |           |           |           |   |           |           |           |
|---|-----------|-----------|-----------|---|-----------|-----------|-----------|
| H | 1.673389  | -3.266396 | -3.735512 | H | 1.676448  | -3.001828 | -3.916243 |
| H | -0.524556 | -2.613297 | -2.790045 | H | -0.527233 | -2.407756 | -2.951728 |
| C | -1.011729 | -1.218892 | -0.471783 | C | -1.031830 | -1.185856 | -0.529992 |
| C | -1.202897 | -1.431746 | 1.026340  | C | -1.239737 | -1.543780 | 0.935432  |
| C | -1.916110 | -2.557243 | 1.468472  | C | -1.897150 | -2.741386 | 1.260583  |
| C | -0.653370 | -0.563025 | 1.982424  | C | -0.736390 | -0.743809 | 1.972543  |
| C | -2.076089 | -2.809505 | 2.833205  | C | -2.053176 | -3.127812 | 2.592731  |
| H | -2.352866 | -3.231947 | 0.739225  | H | -2.295867 | -3.365404 | 0.466914  |
| C | -0.817972 | -0.814237 | 3.348675  | C | -0.899095 | -1.130054 | 3.307737  |
| H | -0.097431 | 0.313045  | 1.666979  | H | -0.219641 | 0.182211  | 1.745539  |
| C | -1.528868 | -1.937233 | 3.779889  | C | -1.556529 | -2.321218 | 3.623531  |
| H | -2.631433 | -3.686651 | 3.155544  | H | -2.567131 | -4.056836 | 2.825891  |
| H | -0.388856 | -0.127166 | 4.073609  | H | -0.508657 | -0.494544 | 4.098516  |
| H | -1.656517 | -2.130515 | 4.841797  | H | -1.682239 | -2.619267 | 4.661112  |
| C | -0.423696 | 2.374656  | -0.521106 | C | -0.368636 | 2.382817  | -0.404676 |
| H | -0.503273 | 2.708006  | -1.568242 | H | -0.427791 | 2.706475  | -1.457322 |
| C | -3.884146 | -0.240460 | -0.538335 | C | -3.817963 | -0.212623 | -0.359607 |
| O | -4.901903 | -0.920124 | -0.524205 | O | -5.026094 | -0.632523 | -0.615553 |
| C | -2.723871 | -0.498056 | -1.503297 | C | -2.760581 | -0.393892 | -1.474996 |
| C | -3.185430 | -0.360376 | -2.943947 | C | -3.292559 | -0.137743 | -2.874190 |
| H | -2.357197 | -0.584546 | -3.622362 | H | -2.481674 | -0.208280 | -3.606027 |
| H | -4.010740 | -1.050640 | -3.143554 | H | -4.064017 | -0.869927 | -3.128437 |
| H | -3.532967 | 0.660988  | -3.138707 | H | -3.735151 | 0.862575  | -2.931013 |
| C | 3.845440  | -0.136263 | 0.679579  | C | 3.830561  | -0.200958 | 0.706080  |
| O | 3.953581  | -0.034448 | 1.888325  | O | 3.887688  | -0.156491 | 1.921630  |

### HH-1-T<sub>1,min</sub>

|   |          |           |           |
|---|----------|-----------|-----------|
| C | 4.073082 | -3.129536 | 0.514506  |
| H | 4.150042 | -3.947205 | -0.209208 |
| H | 5.019474 | -3.061465 | 1.061619  |
| H | 3.285274 | -3.375067 | 1.232073  |
| O | 3.682410 | 0.532228  | 0.057412  |
| C | 3.257073 | 1.744212  | 0.721152  |
| H | 2.909656 | 1.507891  | 1.728740  |
| H | 4.121446 | 2.412246  | 0.777227  |
| O | 1.026911 | 1.494416  | -0.161523 |
| C | 1.642707 | 3.729367  | 0.434842  |
| C | 0.146435 | 3.463478  | 0.692863  |
| H | 2.155833 | 4.019358  | 1.359311  |

### HT-1-S<sub>0</sub>

|   |           |           |           |
|---|-----------|-----------|-----------|
| O | -3.033824 | 1.575473  | 0.004313  |
| C | -3.479208 | 0.498552  | 0.862985  |
| H | -2.693216 | 0.293316  | 1.595648  |
| H | -4.378507 | 0.815386  | 1.399801  |
| O | -2.694670 | -1.133715 | -0.818231 |
| C | -4.090536 | -1.943771 | 0.928062  |
| C | -2.719659 | -2.630746 | 1.005043  |
| H | -4.459860 | -1.642080 | 1.915216  |
| H | -2.792882 | -3.694756 | 1.239805  |
| H | -2.094226 | -2.152138 | 1.766746  |
| O | -5.070272 | -2.744722 | 0.260089  |
| H | -5.267264 | -3.519196 | 0.812489  |

|   |           |           |           |   |           |           |           |
|---|-----------|-----------|-----------|---|-----------|-----------|-----------|
| H | -0.466278 | 4.351926  | 0.528626  | N | -0.661933 | -2.277489 | -0.471365 |
| H | -0.000322 | 3.119892  | 1.717565  | C | 0.057587  | -3.434756 | -0.382352 |
| O | 1.882603  | 4.716649  | -0.575091 | O | -0.438726 | -4.537519 | -0.161939 |
| H | 1.668691  | 5.591085  | -0.210253 | N | 1.441821  | -3.310744 | -0.577936 |
| N | -1.310511 | 1.468959  | -0.127546 | H | 1.947898  | -4.190096 | -0.513472 |
| C | -2.371586 | 1.802366  | 0.675446  | C | -3.800416 | -0.734075 | 0.023917  |
| O | -2.387116 | 2.695436  | 1.517028  | H | -4.647530 | -0.529961 | -0.637135 |
| N | -3.544264 | 1.043515  | 0.491983  | C | -0.006636 | -1.020387 | -0.600484 |
| H | -4.283286 | 1.280056  | 1.148973  | H | -0.715014 | -0.320206 | -1.037066 |
| C | 2.162475  | 2.377891  | -0.118917 | O | 0.525282  | -0.484146 | 0.647089  |
| H | 2.528439  | 2.542676  | -1.141083 | C | 2.925138  | 0.044980  | 0.756526  |
| C | -1.384443 | 0.353336  | -1.051572 | C | 4.197774  | 0.153768  | 0.175798  |
| H | -0.743265 | 0.580686  | -1.903585 | C | 2.825089  | -0.067931 | 2.151192  |
| O | -2.353343 | -1.519755 | -1.368565 | C | 5.344246  | 0.155384  | 0.974449  |
| C | 3.780848  | -1.815756 | -0.220156 | H | 4.307403  | 0.210414  | -0.902020 |
| H | 4.608204  | -1.597853 | -0.905450 | C | 3.972757  | -0.064642 | 2.949880  |
| C | 2.486073  | -1.817876 | -1.032418 | H | 1.846833  | -0.160891 | 2.611690  |
| C | 1.286550  | -2.103872 | -0.464026 | C | 5.236968  | 0.049456  | 2.364894  |
| C | 2.543265  | -1.435974 | -2.451424 | H | 6.322120  | 0.232875  | 0.506222  |
| C | 0.043290  | -1.876026 | -1.217917 | H | 3.875438  | -0.152490 | 4.028979  |
| H | 1.225647  | -2.396255 | 0.579737  | H | 6.129977  | 0.049992  | 2.984398  |
| C | 1.381412  | -1.560232 | -3.271174 | C | -2.144568 | -2.376273 | -0.393799 |
| H | 3.503323  | -1.193195 | -2.895619 | H | -2.439057 | -3.163806 | -1.093376 |
| C | 0.172717  | -1.863951 | -2.714460 | C | 2.153405  | -2.237839 | -1.085293 |
| H | 1.486135  | -1.482679 | -4.351675 | O | 3.326375  | -2.370549 | -1.408772 |
| H | -0.695527 | -2.085976 | -3.326343 | C | 1.377877  | -0.938243 | -1.261706 |
| C | -1.131409 | -1.178174 | -0.603810 | C | 1.440801  | -0.508851 | -2.726901 |
| C | -1.311791 | -1.476788 | 0.879053  | H | 2.474010  | -0.340117 | -3.042568 |
| C | -2.244596 | -2.441631 | 1.286673  | H | 1.017635  | -1.294186 | -3.364279 |
| C | -0.530617 | -0.832974 | 1.851056  | H | 0.868057  | 0.406738  | -2.889256 |
| C | -2.399306 | -2.752947 | 2.640881  | C | 1.653445  | 0.111037  | -0.069805 |
| H | -2.854468 | -2.941674 | 0.541221  | C | 1.284945  | 1.550413  | -0.483687 |
| C | -0.689807 | -1.141910 | 3.205455  | C | 0.016012  | 2.029121  | -0.137337 |
| H | 0.204095  | -0.093169 | 1.550477  | C | 2.117921  | 2.370112  | -1.255479 |
| C | -1.624790 | -2.101587 | 3.605878  | C | -0.483723 | 3.250577  | -0.599835 |
| H | -3.126756 | -3.503312 | 2.940095  | H | -0.593825 | 1.395833  | 0.490698  |
| H | -0.080216 | -0.630885 | 3.946482  | C | 1.650656  | 3.612054  | -1.696960 |
| H | -1.747362 | -2.340187 | 4.659117  | H | 3.116554  | 2.051072  | -1.535511 |
| C | -0.132825 | 2.326452  | -0.290648 | C | 0.355855  | 4.044725  | -1.394564 |
| H | -0.165445 | 2.717720  | -1.319693 | H | 2.296636  | 4.240334  | -2.304602 |
| C | -3.874277 | 0.165323  | -0.512455 | H | 0.008300  | 4.995838  | -1.788097 |

|   |           |           |           |   |           |          |           |
|---|-----------|-----------|-----------|---|-----------|----------|-----------|
| O | -4.986905 | -0.342040 | -0.580631 | C | -2.604602 | 2.689760 | 0.640510  |
| C | -2.762977 | -0.132595 | -1.519974 | O | -2.717973 | 2.844301 | 1.842833  |
| C | -3.212378 | 0.193975  | -2.933683 | C | -1.930548 | 3.681745 | -0.304602 |
| H | -2.417769 | -0.050843 | -3.644211 | H | -2.481517 | 3.638191 | -1.253682 |
| H | -4.108306 | -0.381263 | -3.186473 | C | -2.032708 | 5.108063 | 0.263451  |
| H | -3.449321 | 1.260413  | -3.024183 | H | -1.485927 | 5.193727 | 1.207143  |
| C | 3.676650  | -0.631437 | 0.741918  | H | -1.619110 | 5.831867 | -0.443951 |
| O | 3.556043  | -0.710565 | 1.950485  | H | -3.078916 | 5.375582 | 0.444797  |

### HT-1-S<sub>1,min</sub>

|   |           |           |           |
|---|-----------|-----------|-----------|
| O | -2.874342 | 1.750949  | -0.054359 |
| C | -3.404524 | 0.722160  | 0.818041  |
| H | -2.633498 | 0.466786  | 1.550997  |
| H | -4.272167 | 1.120453  | 1.352373  |
| O | -2.784237 | -0.996840 | -0.853293 |
| C | -4.176950 | -1.658377 | 0.955001  |
| C | -2.852209 | -2.429031 | 1.020048  |
| H | -4.502578 | -1.302279 | 1.939940  |
| H | -2.984562 | -3.476765 | 1.296022  |
| H | -2.175013 | -1.966457 | 1.746940  |
| O | -5.225579 | -2.412922 | 0.337017  |
| H | -5.435852 | -3.172702 | 0.904685  |
| N | -0.829629 | -2.283671 | -0.551355 |
| C | -0.169219 | -3.490620 | -0.308874 |
| O | -0.788324 | -4.521817 | 0.038387  |
| N | 1.174227  | -3.446041 | -0.501932 |
| H | 1.651530  | -4.330367 | -0.369228 |
| C | -3.830233 | -0.498909 | 0.006193  |
| H | -4.681851 | -0.247475 | -0.633037 |
| C | -0.099451 | -1.085559 | -0.682641 |
| H | -0.750391 | -0.330491 | -1.117617 |
| O | 0.450821  | -0.542094 | 0.595339  |
| C | 2.849684  | -0.080355 | 0.752990  |
| C | 4.150120  | -0.192336 | 0.179772  |
| C | 2.718190  | 0.053705  | 2.165713  |
| C | 5.264383  | -0.242358 | 0.997805  |
| H | 4.253365  | -0.303632 | -0.891734 |
| C | 3.836539  | -0.001461 | 2.974310  |
| H | 1.728086  | 0.163328  | 2.593467  |

### HT-1-T<sub>1,min</sub>

|   |           |           |           |
|---|-----------|-----------|-----------|
| O | -3.182410 | 1.279742  | -0.001579 |
| C | -3.615005 | 0.203786  | 0.859969  |
| H | -2.860720 | 0.068463  | 1.641175  |
| H | -4.562522 | 0.471876  | 1.337056  |
| O | -2.679476 | -1.321902 | -0.838541 |
| C | -3.910079 | -2.293303 | 0.948487  |
| C | -2.453719 | -2.777629 | 1.004685  |
| H | -4.302906 | -2.035488 | 1.939289  |
| H | -2.369251 | -3.837724 | 1.255463  |
| H | -1.886326 | -2.203165 | 1.745283  |
| O | -4.776849 | -3.230874 | 0.303335  |
| H | -4.854378 | -4.020250 | 0.864295  |
| N | -0.505485 | -2.172618 | -0.541160 |
| C | 0.345987  | -3.236602 | -0.658994 |
| O | 0.000550  | -4.410570 | -0.536498 |
| N | 1.676008  | -2.919931 | -0.963283 |
| H | 2.273545  | -3.732043 | -1.093042 |
| C | -3.803021 | -1.064192 | 0.031282  |
| H | -4.685835 | -0.971767 | -0.607517 |
| C | -0.005625 | -0.835007 | -0.497703 |
| H | -0.825729 | -0.165484 | -0.751193 |
| O | 0.577748  | -0.453672 | 0.781229  |
| C | 2.987398  | 0.068328  | 0.800227  |
| C | 4.198366  | 0.365125  | 0.156509  |
| C | 3.017968  | -0.406434 | 2.120358  |
| C | 5.415077  | 0.187216  | 0.819558  |
| H | 4.200534  | 0.710665  | -0.872185 |
| C | 4.236072  | -0.581746 | 2.783467  |
| H | 2.086943  | -0.644923 | 2.624111  |

|   |           |           |           |   |           |           |           |
|---|-----------|-----------|-----------|---|-----------|-----------|-----------|
| C | 5.116380  | -0.145175 | 2.394695  | C | 5.439094  | -0.283941 | 2.136533  |
| H | 6.252367  | -0.362065 | 0.565612  | H | 6.344417  | 0.412678  | 0.302876  |
| H | 3.737245  | 0.068767  | 4.052567  | H | 4.242163  | -0.952109 | 3.805424  |
| H | 5.994699  | -0.170390 | 3.031926  | H | 6.386538  | -0.420935 | 2.651043  |
| C | -2.300531 | -2.267596 | -0.403316 | C | -1.951623 | -2.469002 | -0.411419 |
| H | -2.692365 | -3.051705 | -1.058079 | H | -2.151299 | -3.302358 | -1.089598 |
| C | 1.947444  | -2.443326 | -1.177857 | C | 2.174578  | -1.718434 | -1.441956 |
| O | 3.202723  | -2.674226 | -1.363460 | O | 3.273847  | -1.678330 | -1.983431 |
| C | 1.309911  | -1.096636 | -1.310178 | C | 1.290098  | -0.501706 | -1.255574 |
| C | 1.427010  | -0.550082 | -2.734392 | C | 1.157828  | 0.256774  | -2.572529 |
| H | 2.476592  | -0.475864 | -3.037110 | H | 2.139040  | 0.539793  | -2.961712 |
| H | 0.932509  | -1.240535 | -3.427064 | H | 0.667081  | -0.378928 | -3.319152 |
| H | 0.959571  | 0.433817  | -2.845987 | H | 0.554735  | 1.158318  | -2.446358 |
| C | 1.611842  | -0.057197 | -0.093374 | C | 1.642194  | 0.301175  | 0.124863  |
| C | 1.431601  | 1.438254  | -0.422611 | C | 1.296527  | 1.776568  | 0.133817  |
| C | 0.213232  | 2.038353  | -0.047299 | C | -0.106088 | 2.173464  | 0.401658  |
| C | 2.357623  | 2.190815  | -1.189594 | C | 2.141701  | 2.802678  | -0.539053 |
| C | -0.194668 | 3.257824  | -0.573866 | C | -0.719890 | 3.067357  | -0.415404 |
| H | -0.442566 | 1.454772  | 0.581614  | H | -0.632975 | 1.675013  | 1.208030  |
| C | 1.995434  | 3.453964  | -1.648233 | C | 1.523834  | 3.710422  | -1.342797 |
| H | 3.322916  | 1.780255  | -1.462399 | H | 3.217650  | 2.818010  | -0.393736 |
| C | 0.725498  | 3.976537  | -1.374492 | C | 0.086272  | 3.764867  | -1.415511 |
| H | 2.691884  | 4.026830  | -2.252803 | H | 2.105179  | 4.440976  | -1.901736 |
| H | 0.449591  | 4.939520  | -1.792306 | H | -0.392688 | 4.443429  | -2.114267 |
| C | -2.393689 | 2.848916  | 0.568604  | C | -2.922231 | 2.455154  | 0.610245  |
| O | -2.521262 | 3.043120  | 1.763355  | O | -3.198302 | 2.668988  | 1.777011  |
| C | -1.627695 | 3.770177  | -0.379950 | C | -2.202615 | 3.430881  | -0.312325 |
| H | -2.120660 | 3.704058  | -1.359031 | H | -2.632568 | 3.303579  | -1.315254 |
| C | -1.690962 | 5.227063  | 0.113413  | C | -2.420930 | 4.886134  | 0.141230  |
| H | -1.183257 | 5.338219  | 1.075766  | H | -2.021888 | 5.043202  | 1.147574  |
| H | -1.221754 | 5.900043  | -0.609288 | H | -1.918157 | 5.576375  | -0.542657 |
| H | -2.732980 | 5.539997  | 0.233455  | H | -3.488102 | 5.131987  | 0.147943  |

### HH-2-S<sub>0</sub>

|   |          |           |           |
|---|----------|-----------|-----------|
| C | 5.548997 | -1.293107 | -0.847257 |
| H | 5.616358 | -2.155476 | -1.517960 |
| H | 6.300399 | -0.562287 | -1.163978 |
| H | 5.800302 | -1.618594 | 0.166736  |
| O | 3.231020 | 1.483760  | -0.560534 |

### HH-2-S<sub>1,min</sub>

|   |          |           |           |
|---|----------|-----------|-----------|
| C | 4.123414 | -2.743168 | 1.227650  |
| H | 4.246155 | -3.707546 | 0.725479  |
| H | 5.036090 | -2.526963 | 1.792106  |
| H | 3.294128 | -2.825391 | 1.936399  |
| O | 3.706661 | 0.705045  | -0.070380 |

|   |           |           |           |   |           |           |           |
|---|-----------|-----------|-----------|---|-----------|-----------|-----------|
| C | 2.658276  | 2.472734  | 0.320194  | C | 3.322997  | 2.032582  | 0.347812  |
| H | 2.363474  | 1.983226  | 1.252803  | H | 3.039351  | 2.013726  | 1.401428  |
| H | 3.396969  | 3.248580  | 0.544565  | H | 4.188202  | 2.688188  | 0.212500  |
| O | 0.589352  | 2.034857  | -0.873157 | O | 1.047216  | 1.629163  | -0.324140 |
| C | 0.613549  | 3.968282  | 0.550844  | C | 1.681883  | 3.934009  | -0.226288 |
| C | -0.686535 | 3.164351  | 0.710275  | C | 0.205654  | 3.728408  | 0.171437  |
| H | 1.113806  | 4.134498  | 1.512172  | H | 2.247323  | 4.394863  | 0.593908  |
| H | -1.550476 | 3.803522  | 0.894701  | H | -0.423011 | 4.571505  | -0.119938 |
| H | -0.597106 | 2.440035  | 1.526704  | H | 0.117105  | 3.581065  | 1.248014  |
| O | 0.415416  | 5.222804  | -0.112002 | O | 1.846299  | 4.689091  | -1.424921 |
| H | -0.073145 | 5.813755  | 0.484582  | H | 1.619707  | 5.611315  | -1.222986 |
| N | -1.615510 | 1.213944  | -0.686989 | N | -1.280402 | 1.625725  | -0.189700 |
| C | -2.952308 | 1.489479  | -0.647214 | C | -2.316732 | 2.131782  | 0.579341  |
| O | -3.413165 | 2.590909  | -0.347282 | O | -2.261327 | 3.167520  | 1.247685  |
| N | -3.841358 | 0.455848  | -0.983351 | N | -3.494049 | 1.415959  | 0.552182  |
| H | -4.821439 | 0.702434  | -0.872446 | H | -4.203754 | 1.784307  | 1.174112  |
| C | 1.461915  | 3.083633  | -0.391909 | C | 2.174739  | 2.494285  | -0.530300 |
| H | 1.792453  | 3.677785  | -1.251359 | H | 2.475728  | 2.456720  | -1.585959 |
| C | -1.090279 | -0.075525 | -1.127653 | C | -1.416093 | 0.393298  | -0.936427 |
| H | -0.232513 | 0.115252  | -1.764441 | H | -0.873684 | 0.508037  | -1.877795 |
| O | -1.747840 | -2.103291 | -0.859667 | O | -2.318987 | -1.508298 | -1.084347 |
| C | 4.151561  | -0.670346 | -0.914263 | C | 3.847031  | -1.645493 | 0.188543  |
| H | 3.962661  | -0.329802 | -1.939184 | H | 4.697783  | -1.581477 | -0.500983 |
| C | 2.995652  | -1.604042 | -0.506480 | C | 2.598456  | -1.933479 | -0.643545 |
| C | 1.677653  | -1.114873 | -0.520234 | C | 1.338913  | -1.516674 | -0.210634 |
| C | 3.195828  | -2.921332 | -0.094019 | C | 2.676499  | -2.638465 | -1.845191 |
| C | 0.581622  | -1.881708 | -0.118145 | C | 0.163433  | -1.730723 | -0.944828 |
| H | 1.516593  | -0.090056 | -0.827513 | H | 1.272168  | -0.981928 | 0.727771  |
| C | 2.103300  | -3.707394 | 0.289067  | C | 1.514853  | -2.902308 | -2.564776 |
| H | 4.190864  | -3.353248 | -0.062760 | H | 3.636936  | -2.985518 | -2.218791 |
| C | 0.790597  | -3.221752 | 0.299799  | C | 0.244179  | -2.458505 | -2.159544 |
| H | 2.281559  | -4.733640 | 0.602568  | H | 1.589391  | -3.467805 | -3.490184 |
| C | -0.816996 | -1.257391 | -0.094447 | C | -1.106496 | -1.068869 | -0.385292 |
| C | -1.309942 | -1.001780 | 1.326540  | C | -1.280621 | -1.298055 | 1.115957  |
| C | -2.603257 | -1.361311 | 1.728438  | C | -1.990980 | -2.430596 | 1.544040  |
| C | -0.464953 | -0.376432 | 2.257346  | C | -0.708205 | -0.455922 | 2.080810  |
| C | -3.044598 | -1.098504 | 3.029837  | C | -2.133301 | -2.710338 | 2.901906  |
| H | -3.260709 | -1.868653 | 1.030670  | H | -2.443715 | -3.084396 | 0.805824  |
| C | -0.906523 | -0.107284 | 3.554755  | C | -0.856495 | -0.736678 | 3.442601  |
| H | 0.547305  | -0.105240 | 1.971754  | H | -0.145765 | 0.419076  | 1.775089  |
| C | -2.200351 | -0.467384 | 3.946895  | C | -1.568237 | -1.861527 | 3.858747  |



|   |           |           |           |   |           |           |           |
|---|-----------|-----------|-----------|---|-----------|-----------|-----------|
| H | -4.048733 | -1.392846 | 3.324350  | H | -2.689427 | -3.590410 | 3.213581  |
| H | -0.236609 | 0.377618  | 4.260192  | H | -0.411098 | -0.069778 | 4.175853  |
| H | -2.542939 | -0.263529 | 4.957971  | H | -1.682547 | -2.076913 | 4.917536  |
| C | -0.754840 | 2.425122  | -0.628808 | C | -0.119980 | 2.427020  | -0.561275 |
| H | -1.097163 | 3.104476  | -1.421105 | H | -0.188018 | 2.624863  | -1.644198 |
| C | -3.564793 | -0.729499 | -1.612458 | C | -3.755616 | 0.170548  | -0.049188 |
| O | -4.452717 | -1.495316 | -1.966670 | O | -5.013540 | -0.166355 | -0.158317 |
| C | -2.083115 | -1.049659 | -1.801761 | C | -2.826686 | -0.167891 | -1.233743 |
| C | -1.789423 | -1.437010 | -3.241948 | C | -3.478458 | 0.068462  | -2.585828 |
| H | -0.740677 | -1.731970 | -3.340918 | H | -2.766906 | -0.114166 | -3.396382 |
| H | -2.426828 | -2.273072 | -3.543979 | H | -4.337616 | -0.595623 | -2.712262 |
| H | -1.982403 | -0.591308 | -3.912527 | H | -3.830552 | 1.102819  | -2.653294 |
| C | 4.045501  | 0.556554  | -0.013221 | C | 3.715815  | -0.278946 | 0.854858  |
| O | 4.548899  | 0.675515  | 1.088943  | O | 3.596792  | -0.091951 | 2.049396  |
| C | -0.323016 | -4.141389 | 0.749473  | C | -0.918911 | -2.817718 | -3.064311 |
| H | -0.919815 | -3.696829 | 1.553087  | H | -1.710554 | -3.349163 | -2.531831 |
| H | -1.013303 | -4.366505 | -0.069941 | H | -1.380112 | -1.936217 | -3.520413 |
| H | 0.090343  | -5.085191 | 1.118714  | H | -0.563402 | -3.458930 | -3.876975 |

### HH-2-T<sub>1,min</sub>

|   |           |           |           |
|---|-----------|-----------|-----------|
| C | 3.592835  | -3.343443 | 1.098594  |
| H | 3.527131  | -4.273075 | 0.524444  |
| H | 4.555609  | -3.326817 | 1.620672  |
| H | 2.802711  | -3.345461 | 1.854184  |
| O | 3.844196  | 0.192857  | 0.051130  |
| C | 3.605115  | 1.557686  | 0.465368  |
| H | 3.314592  | 1.577732  | 1.517317  |
| H | 4.541493  | 2.104833  | 0.327829  |
| O | 1.306636  | 1.396753  | -0.229838 |
| C | 2.184352  | 3.622311  | -0.164472 |
| C | 0.676683  | 3.595699  | 0.160150  |
| H | 2.758819  | 4.030684  | 0.675178  |
| H | 0.159247  | 4.487328  | -0.201851 |
| H | 0.528152  | 3.515389  | 1.236319  |
| O | 2.504608  | 4.346381  | -1.358233 |
| H | 2.418194  | 5.296316  | -1.175619 |
| N | -1.023408 | 1.649699  | -0.200820 |
| C | -1.959986 | 2.201228  | 0.638122  |
| O | -1.780584 | 3.144482  | 1.401886  |

### HT-2-S<sub>0</sub>

|   |           |           |           |
|---|-----------|-----------|-----------|
| O | -2.920797 | 1.859580  | 0.007108  |
| C | -3.489492 | 0.832284  | 0.852324  |
| H | -2.733171 | 0.524445  | 1.580254  |
| H | -4.345676 | 1.245616  | 1.394261  |
| O | -2.892005 | -0.850161 | -0.850451 |
| C | -4.389871 | -1.521022 | 0.871435  |
| C | -3.112913 | -2.369930 | 0.941221  |
| H | -4.725686 | -1.195281 | 1.863021  |
| H | -3.316445 | -3.421824 | 1.150703  |
| H | -2.441685 | -1.987872 | 1.718317  |
| O | -5.455423 | -2.185775 | 0.185362  |
| H | -5.746429 | -2.941741 | 0.721837  |
| N | -1.011798 | -2.231952 | -0.508110 |
| C | -0.438639 | -3.462811 | -0.373493 |
| O | -1.066631 | -4.493568 | -0.140764 |
| N | 0.953835  | -3.511055 | -0.544396 |
| H | 1.341532  | -4.448857 | -0.482397 |
| C | -3.950936 | -0.338889 | -0.007944 |
| H | -4.762408 | -0.023714 | -0.670201 |

|   |           |           |           |   |           |           |           |
|---|-----------|-----------|-----------|---|-----------|-----------|-----------|
| N | -3.244540 | 1.626078  | 0.587906  | C | -0.209071 | -1.060161 | -0.634341 |
| H | -3.893266 | 2.029549  | 1.258789  | H | -0.814935 | -0.292625 | -1.111891 |
| C | 2.524702  | 2.132980  | -0.432420 | O | 0.328181  | -0.571921 | 0.621318  |
| H | 2.831746  | 2.038586  | -1.483008 | C | 2.723211  | -0.331113 | 0.926834  |
| C | -1.313359 | 0.450701  | -0.967380 | C | 3.977388  | -0.846992 | 0.579725  |
| H | -0.694820 | 0.470799  | -1.865009 | C | 2.506257  | 0.069221  | 2.258315  |
| O | -2.575004 | -1.263626 | -1.024820 | C | 4.988515  | -0.967416 | 1.540850  |
| C | 3.477629  | -2.142182 | 0.153865  | H | 4.174531  | -1.171644 | -0.433921 |
| H | 4.313039  | -2.162674 | -0.555669 | C | 3.513622  | -0.050843 | 3.216203  |
| C | 2.180488  | -2.085576 | -0.654534 | H | 1.539953  | 0.472704  | 2.546103  |
| C | 0.960624  | -2.281742 | -0.085616 | C | 4.763232  | -0.571307 | 2.860362  |
| C | 2.260793  | -1.763831 | -2.086475 | H | 5.953363  | -1.374681 | 1.249394  |
| C | -0.245591 | -2.002287 | -0.875568 | H | 3.322170  | 0.262205  | 4.239407  |
| H | 0.870673  | -2.513671 | 0.970972  | H | 5.549734  | -0.666928 | 3.604431  |
| C | 1.137779  | -1.937361 | -2.908506 | C | -2.497225 | -2.156270 | -0.447579 |
| H | 3.233187  | -1.559856 | -2.524451 | H | -2.875215 | -2.889392 | -1.166348 |
| C | -0.104859 | -2.235625 | -2.361679 | C | 1.789474  | -2.550008 | -1.081903 |
| H | 1.276602  | -1.984555 | -3.988582 | O | 2.919386  | -2.851605 | -1.445689 |
| C | -1.280429 | -1.038173 | -0.345756 | C | 1.200069  | -1.152822 | -1.247199 |
| C | -1.443651 | -1.124850 | 1.168232  | C | 1.324231  | -0.740867 | -2.715302 |
| C | -2.486583 | -1.888902 | 1.711875  | H | 2.354757  | -0.818683 | -3.067946 |
| C | -0.543443 | -0.488464 | 2.036827  | H | 0.710161  | -1.408174 | -3.331807 |
| C | -2.633075 | -2.009332 | 3.097077  | H | 0.968850  | 0.280747  | -2.866258 |
| H | -3.188881 | -2.381238 | 1.046988  | C | 1.562782  | -0.129970 | -0.042484 |
| C | -0.694129 | -0.605439 | 3.422049  | C | 1.399043  | 1.350029  | -0.476480 |
| H | 0.277996  | 0.094374  | 1.633353  | C | 0.181075  | 1.962400  | -0.148618 |
| C | -1.739004 | -1.364833 | 3.957713  | C | 2.352746  | 2.086758  | -1.215088 |
| H | -3.447455 | -2.605096 | 3.501598  | C | -0.182640 | 3.241343  | -0.576750 |
| H | 0.008870  | -0.102278 | 4.081193  | H | -0.507033 | 1.382195  | 0.448391  |
| H | -1.854297 | -1.454274 | 5.034838  | C | 1.994479  | 3.382928  | -1.623455 |
| C | 0.241049  | 2.304294  | -0.535469 | C | 0.753713  | 3.952883  | -1.335948 |
| H | 0.226027  | 2.461624  | -1.625413 | H | 2.710857  | 3.957518  | -2.206278 |
| C | -3.765671 | 0.718571  | -0.302389 | H | 0.527660  | 4.945518  | -1.715325 |
| O | -4.945225 | 0.390915  | -0.267914 | C | -2.353160 | 2.903378  | 0.653168  |
| C | -2.775607 | 0.145277  | -1.318495 | O | -2.432429 | 3.051807  | 1.859223  |
| C | -3.256873 | 0.397822  | -2.736998 | C | -1.578547 | 3.819751  | -0.289545 |
| H | -2.547783 | -0.020894 | -3.456255 | H | -2.128721 | 3.832403  | -1.239962 |
| H | -4.238056 | -0.061832 | -2.890469 | C | -1.537621 | 5.250031  | 0.276425  |
| H | -3.347673 | 1.474612  | -2.922275 | H | -0.986298 | 5.282621  | 1.220817  |
| C | 3.566680  | -0.814132 | 0.906788  | H | -1.053191 | 5.927994  | -0.431493 |
| O | 3.372177  | -0.663961 | 2.098445  | H | -2.552109 | 5.621701  | 0.455424  |

|   |           |           |           |   |          |          |           |
|---|-----------|-----------|-----------|---|----------|----------|-----------|
| C | -1.169371 | -2.941085 | -3.148548 | C | 3.728592 | 1.579385 | -1.584957 |
| H | -1.388812 | -3.918187 | -2.688905 | H | 4.397603 | 1.574583 | -0.716607 |
| H | -2.118178 | -2.395502 | -3.154289 | H | 3.713981 | 0.561087 | -1.981213 |
| H | -0.846232 | -3.113136 | -4.180867 | H | 4.177451 | 2.224454 | -2.346680 |

### HT-2-S<sub>1,min</sub>

|   |           |           |           |
|---|-----------|-----------|-----------|
| O | -2.846002 | 1.853440  | -0.042115 |
| C | -3.460673 | 0.861142  | 0.819581  |
| H | -2.716992 | 0.551670  | 1.559833  |
| H | -4.304098 | 1.318339  | 1.344777  |
| O | -2.950709 | -0.871357 | -0.874241 |
| C | -4.368875 | -1.470607 | 0.933775  |
| C | -3.083767 | -2.306566 | 0.994875  |
| H | -4.678919 | -1.107210 | 1.921116  |
| H | -3.268326 | -3.348866 | 1.261141  |
| H | -2.386664 | -1.885368 | 1.727880  |
| O | -5.451703 | -2.166409 | 0.306371  |
| H | -5.701948 | -2.919332 | 0.867000  |
| N | -1.049686 | -2.233665 | -0.568603 |
| C | -0.442459 | -3.469220 | -0.349893 |
| O | -1.093402 | -4.469994 | 0.019334  |
| N | 0.896746  | -3.488120 | -0.592637 |
| H | 1.331188  | -4.400103 | -0.506377 |
| C | -3.960654 | -0.323015 | -0.004312 |
| H | -4.797868 | -0.013922 | -0.637065 |
| C | -0.266764 | -1.058166 | -0.670338 |
| H | -0.889951 | -0.274130 | -1.095554 |
| O | 0.289119  | -0.583206 | 0.614146  |
| C | 2.687084  | -0.389960 | 0.932439  |
| C | 3.809695  | -1.177051 | 0.622329  |
| C | 2.621596  | 0.245348  | 2.196437  |
| C | 4.832687  | -1.329322 | 1.557680  |
| H | 3.861455  | -1.689838 | -0.333745 |
| C | 3.648472  | 0.092893  | 3.125729  |
| H | 1.753606  | 0.846797  | 2.451084  |
| C | 4.762190  | -0.691998 | 2.807083  |
| H | 5.689776  | -1.952706 | 1.317232  |
| H | 3.582152  | 0.584095  | 4.092431  |
| H | 5.568802  | -0.811985 | 3.525112  |

### HT-2-T<sub>1,min</sub>

|   |           |           |           |
|---|-----------|-----------|-----------|
| O | -3.096497 | 1.598753  | 0.049847  |
| C | -3.633641 | 0.569980  | 0.908098  |
| H | -2.876491 | 0.320672  | 1.657825  |
| H | -4.522265 | 0.945812  | 1.424305  |
| O | -2.947826 | -1.018305 | -0.846893 |
| C | -4.255938 | -1.868520 | 0.946407  |
| C | -2.872867 | -2.535365 | 0.960275  |
| H | -4.594857 | -1.588844 | 1.951116  |
| H | -2.919909 | -3.604126 | 1.181389  |
| H | -2.224839 | -2.058776 | 1.704080  |
| O | -5.247047 | -2.670459 | 0.297182  |
| H | -5.410217 | -3.460817 | 0.837890  |
| N | -0.887724 | -2.134389 | -0.605005 |
| C | -0.178395 | -3.300035 | -0.679046 |
| O | -0.671374 | -4.416571 | -0.526250 |
| N | 1.182319  | -3.166383 | -0.984410 |
| H | 1.659162  | -4.053805 | -1.121209 |
| C | -4.008517 | -0.640056 | 0.057707  |
| H | -4.884972 | -0.414166 | -0.556156 |
| C | -0.223123 | -0.867251 | -0.577961 |
| H | -0.945506 | -0.106934 | -0.869782 |
| O | 0.363375  | -0.539271 | 0.708196  |
| C | 2.794896  | -0.417687 | 0.862998  |
| C | 4.031418  | -0.704565 | 0.269869  |
| C | 2.681679  | -0.501132 | 2.262467  |
| C | 5.127876  | -1.074982 | 1.056508  |
| H | 4.144699  | -0.660877 | -0.806801 |
| C | 3.775619  | -0.869845 | 3.046714  |
| H | 1.728987  | -0.284477 | 2.735954  |
| C | 5.006194  | -1.158412 | 2.445421  |
| H | 6.076799  | -1.300265 | 0.576432  |
| H | 3.666235  | -0.932406 | 4.126392  |
| H | 5.859061  | -1.447554 | 3.053988  |

|   |           |           |           |   |           |           |           |
|---|-----------|-----------|-----------|---|-----------|-----------|-----------|
| C | -2.519108 | -2.161064 | -0.425498 | C | -2.359004 | -2.253457 | -0.457892 |
| H | -2.938067 | -2.925716 | -1.086355 | H | -2.669673 | -3.039419 | -1.151209 |
| C | 1.653932  | -2.522132 | -1.334464 | C | 1.819490  | -2.054945 | -1.511609 |
| O | 2.812442  | -2.866375 | -1.775415 | O | 2.877826  | -2.184256 | -2.117914 |
| C | 1.130187  | -1.128489 | -1.318449 | C | 1.129417  | -0.719071 | -1.304003 |
| C | 1.242105  | -0.494229 | -2.708871 | C | 1.123306  | 0.059193  | -2.617128 |
| H | 2.275239  | -0.510688 | -3.066855 | H | 2.141497  | 0.238086  | -2.971375 |
| H | 0.643466  | -1.081351 | -3.414685 | H | 0.592980  | -0.515988 | -3.385377 |
| H | 0.872317  | 0.535599  | -2.740182 | H | 0.617004  | 1.018914  | -2.501001 |
| C | 1.522870  | -0.160577 | -0.012308 | C | 1.560657  | 0.030321  | 0.083427  |
| C | 1.440219  | 1.338668  | -0.324667 | C | 1.443184  | 1.555124  | 0.080792  |
| C | 0.261614  | 2.001118  | 0.035174  | C | 0.120932  | 2.125649  | 0.400790  |
| C | 2.446079  | 2.070938  | -1.079508 | C | 2.383131  | 2.488912  | -0.645902 |
| C | -0.100081 | 3.227581  | -0.514909 | C | -0.430564 | 3.045889  | -0.431630 |
| H | -0.433078 | 1.447537  | 0.649218  | H | -0.430742 | 1.713572  | 1.238931  |
| C | 2.090134  | 3.335038  | -1.592764 | C | 1.788231  | 3.388340  | -1.510331 |
| C | 0.853330  | 3.901096  | -1.346184 | C | 0.391626  | 3.594364  | -1.516269 |
| H | 2.815358  | 3.875413  | -2.192535 | H | 2.414434  | 4.032507  | -2.126786 |
| H | 0.609288  | 4.863647  | -1.781916 | H | -0.050303 | 4.300278  | -2.213142 |
| C | -2.338048 | 2.930412  | 0.590156  | C | -2.653150 | 2.713360  | 0.668159  |
| O | -2.499784 | 3.148221  | 1.775738  | O | -2.847258 | 2.937743  | 1.849570  |
| C | -1.495875 | 3.809396  | -0.336523 | C | -1.847447 | 3.596992  | -0.273440 |
| H | -1.972701 | 3.794762  | -1.327021 | H | -2.326598 | 3.537611  | -1.259967 |
| C | -1.467703 | 5.265736  | 0.175083  | C | -1.854420 | 5.064741  | 0.193801  |
| H | -0.976753 | 5.328495  | 1.149725  | H | -1.408238 | 5.157569  | 1.188246  |
| H | -0.940477 | 5.915035  | -0.528169 | H | -1.282757 | 5.686084  | -0.502118 |
| H | -2.490622 | 5.640144  | 0.275788  | H | -2.878265 | 5.451848  | 0.233818  |
| C | 3.821800  | 1.549949  | -1.330291 | C | 3.853427  | 2.541070  | -0.355125 |
| H | 4.439647  | 1.642175  | -0.426779 | H | 4.035106  | 2.612051  | 0.726674  |
| H | 3.815024  | 0.484624  | -1.583486 | H | 4.380205  | 1.640033  | -0.691198 |
| H | 4.310125  | 2.109302  | -2.131641 | H | 4.313598  | 3.406079  | -0.843502 |

### HH-3-S<sub>0</sub>

|   |          |           |           |
|---|----------|-----------|-----------|
| C | 4.255445 | -2.222817 | 1.896114  |
| H | 4.410246 | -3.273875 | 1.631798  |
| H | 5.158627 | -1.852906 | 2.391974  |
| H | 3.426483 | -2.166758 | 2.609252  |
| O | 3.531809 | 0.781593  | -0.186779 |
| C | 3.089622 | 2.153323  | -0.069468 |

### HH-3-S<sub>1,min</sub>

|   |          |           |           |
|---|----------|-----------|-----------|
| C | 4.486640 | -2.043535 | 1.606801  |
| H | 4.689353 | -3.070876 | 1.292322  |
| H | 5.386128 | -1.640718 | 2.079507  |
| H | 3.688981 | -2.065163 | 2.355089  |
| O | 3.384801 | 0.958404  | -0.262218 |
| C | 2.852036 | 2.269167  | -0.026298 |

|   |           |           |           |   |           |           |           |
|---|-----------|-----------|-----------|---|-----------|-----------|-----------|
| H | 2.764451  | 2.345154  | 0.955135  | H | 2.513328  | 2.343936  | 1.008964  |
| H | 3.933321  | 2.807229  | -0.311731 | H | 3.639630  | 3.007604  | -0.201364 |
| O | 0.846328  | 1.532707  | -0.711485 | O | 0.657034  | 1.560488  | -0.717700 |
| C | 1.420949  | 3.821981  | -1.096024 | C | 1.089091  | 3.892418  | -0.898606 |
| C | -0.056426 | 3.670499  | -0.680987 | C | -0.354501 | 3.621773  | -0.463283 |
| H | 1.959348  | 4.475996  | -0.400214 | H | 1.613493  | 4.522824  | -0.172436 |
| H | -0.699721 | 4.408903  | -1.163143 | H | -1.049274 | 4.359800  | -0.860928 |
| H | -0.151716 | 3.776552  | 0.400664  | H | -0.428900 | 3.624989  | 0.626290  |
| O | 1.591360  | 4.304413  | -2.434088 | O | 1.178531  | 4.481661  | -2.193191 |
| H | 1.364070  | 5.248513  | -2.453510 | H | 0.871642  | 5.399675  | -2.141431 |
| N | -1.474171 | 1.494023  | -0.514583 | N | -1.626181 | 1.385877  | -0.387073 |
| C | -2.499699 | 2.097441  | 0.162918  | C | -2.773288 | 1.950675  | 0.111529  |
| O | -2.550677 | 3.280102  | 0.488288  | O | -2.948338 | 3.161014  | 0.259387  |
| N | -3.585844 | 1.267556  | 0.509973  | N | -3.788312 | 1.085933  | 0.445647  |
| H | -4.275905 | 1.732133  | 1.094382  | H | -4.574924 | 1.528216  | 0.905616  |
| C | 1.961807  | 2.369281  | -1.065359 | C | 1.711594  | 2.487133  | -0.997704 |
| H | 2.302950  | 2.106355  | -2.075371 | H | 2.063982  | 2.333681  | -2.024665 |
| C | -1.523502 | 0.085164  | -0.872550 | C | -1.575467 | -0.010766 | -0.765830 |
| H | -1.042788 | -0.026191 | -1.844657 | H | -1.179595 | -0.080560 | -1.780750 |
| O | -2.254116 | -1.816445 | -0.282512 | O | -2.061565 | -1.976580 | -0.202598 |
| C | 3.951384  | -1.414618 | 0.625899  | C | 4.081144  | -1.207110 | 0.393349  |
| H | 4.805990  | -1.499624 | -0.058586 | H | 4.906622  | -1.206950 | -0.329307 |
| C | 2.712845  | -1.894399 | -0.124521 | C | 2.841468  | -1.718659 | -0.319164 |
| C | 1.438704  | -1.541752 | 0.335539  | C | 1.583243  | -1.455729 | 0.221671  |
| C | 2.800058  | -2.602595 | -1.320684 | C | 2.900987  | -2.344386 | -1.554108 |
| C | 0.263609  | -1.762981 | -0.388208 | C | 0.395324  | -1.688751 | -0.459093 |
| H | 1.367372  | -1.002313 | 1.272254  | H | 1.531852  | -0.975117 | 1.191263  |
| C | 1.646616  | -2.904626 | -2.049137 | C | 1.732255  | -2.650624 | -2.247979 |
| H | 3.768279  | -2.905419 | -1.713385 | H | 3.861314  | -2.573268 | -2.008839 |
| C | 0.387617  | -2.456490 | -1.624431 | C | 0.486164  | -2.288645 | -1.737120 |
| H | 1.745175  | -3.452010 | -2.978624 | H | 1.808551  | -3.128914 | -3.215858 |
| C | -1.026497 | -1.085208 | 0.081234  | C | -0.905513 | -1.134634 | 0.109071  |
| C | -1.061795 | -0.804846 | 1.586405  | C | -0.867510 | -0.905602 | 1.614554  |
| C | -1.712645 | -1.723652 | 2.425242  | C | -1.328928 | -1.919462 | 2.458634  |
| C | -0.450478 | 0.317228  | 2.168403  | C | -0.348945 | 0.259118  | 2.184073  |
| C | -1.755962 | -1.525857 | 3.807765  | C | -1.283430 | -1.769496 | 3.840745  |
| H | -2.195859 | -2.592005 | 1.989844  | H | -1.739029 | -2.826244 | 2.027623  |
| C | -0.501660 | 0.519906  | 3.551502  | C | -0.310723 | 0.412784  | 3.568655  |
| H | 0.079825  | 1.028214  | 1.545545  | H | 0.040903  | 1.042126  | 1.546090  |
| C | -1.154411 | -0.399084 | 4.377211  | C | -0.778790 | -0.598131 | 4.402445  |
| H | -2.264289 | -2.251192 | 4.438093  | H | -1.648516 | -2.568054 | 4.480039  |

|   |           |           |           |   |           |           |           |
|---|-----------|-----------|-----------|---|-----------|-----------|-----------|
| H | -0.025016 | 1.397820  | 3.980404  | H | 0.092632  | 1.327596  | 3.993285  |
| H | -1.192450 | -0.240516 | 5.451846  | H | -0.748036 | -0.476729 | 5.481190  |
| C | -0.346832 | 2.228444  | -1.098177 | C | -0.581649 | 2.210618  | -0.991319 |
| H | -0.451202 | 2.160824  | -2.192424 | H | -0.739692 | 2.222949  | -2.081060 |
| C | -3.864338 | -0.025231 | 0.134219  | C | -3.717886 | -0.320203 | 0.480630  |
| O | -4.857674 | -0.613355 | 0.542028  | O | -4.827634 | -0.942660 | 0.716089  |
| C | -2.875996 | -0.640907 | -0.859878 | C | -2.839382 | -0.885541 | -0.670808 |
| C | -3.579435 | -0.918235 | -2.178769 | C | -3.652037 | -1.203288 | -1.906083 |
| H | -2.871958 | -1.350168 | -2.888697 | H | -2.985830 | -1.473953 | -2.726742 |
| H | -4.406772 | -1.617402 | -2.020904 | H | -4.328466 | -2.037550 | -1.704607 |
| H | -3.987885 | 0.008835  | -2.598013 | H | -4.251296 | -0.335490 | -2.197372 |
| C | 3.801309  | 0.079782  | 0.933850  | C | 3.854222  | 0.252112  | 0.775190  |
| O | 3.885637  | 0.583223  | 2.039708  | O | 4.039529  | 0.727977  | 1.875917  |
| O | -0.736049 | -2.637651 | -2.377776 | O | -0.663426 | -2.461596 | -2.442312 |
| C | -0.631342 | -3.323990 | -3.626563 | C | -0.595911 | -3.049574 | -3.733917 |
| H | -1.643348 | -3.344306 | -4.033578 | H | -1.623235 | -3.087262 | -4.095797 |
| H | 0.032089  | -2.793042 | -4.319392 | H | 0.009523  | -2.442813 | -4.415356 |
| H | -0.275846 | -4.351149 | -3.485030 | H | -0.192380 | -4.066042 | -3.683985 |

### HH-3- $T_{1,\min}$

|   |           |           |           |
|---|-----------|-----------|-----------|
| C | 3.710344  | -2.738713 | 2.057089  |
| H | 3.655281  | -3.803382 | 1.808769  |
| H | 4.678501  | -2.543821 | 2.530586  |
| H | 2.928670  | -2.512025 | 2.787041  |
| O | 3.800102  | 0.289117  | -0.080464 |
| C | 3.546480  | 1.712804  | -0.095414 |
| H | 3.272115  | 2.048106  | 0.906469  |
| H | 4.470997  | 2.204786  | -0.409979 |
| O | 1.232756  | 1.344377  | -0.657186 |
| C | 2.101618  | 3.480141  | -1.299062 |
| C | 0.610028  | 3.564925  | -0.917636 |
| H | 2.708179  | 4.126333  | -0.653806 |
| H | 0.072335  | 4.311494  | -1.506549 |
| H | 0.510317  | 3.812994  | 0.138595  |
| O | 2.364376  | 3.794518  | -2.671821 |
| H | 2.280482  | 4.754780  | -2.790934 |
| N | -1.091909 | 1.617700  | -0.586595 |
| C | -1.998035 | 2.408160  | 0.074312  |
| O | -1.812419 | 3.560809  | 0.452792  |

### HT-3- $S_0$

|   |           |           |           |
|---|-----------|-----------|-----------|
| O | -2.805532 | 2.142358  | 0.022955  |
| C | -3.550417 | 1.142826  | 0.757417  |
| H | -2.893437 | 0.708979  | 1.517048  |
| H | -4.394357 | 1.623440  | 1.261689  |
| O | -3.021060 | -0.525271 | -0.986008 |
| C | -4.736887 | -1.072062 | 0.565043  |
| C | -3.586032 | -2.079005 | 0.698717  |
| H | -5.123577 | -0.751907 | 1.539747  |
| H | -3.935606 | -3.104737 | 0.831749  |
| H | -2.948471 | -1.819734 | 1.551130  |
| O | -5.805357 | -1.563231 | -0.250827 |
| H | -6.232404 | -2.304548 | 0.209342  |
| N | -1.355625 | -2.138014 | -0.549266 |
| C | -0.941208 | -3.431711 | -0.418535 |
| O | -1.702635 | -4.387340 | -0.280157 |
| N | 0.445958  | -3.638088 | -0.467971 |
| H | 0.720418  | -4.612903 | -0.379483 |
| C | -4.075293 | 0.082576  | -0.204275 |
| H | -4.778107 | 0.531919  | -0.911693 |

|   |           |           |           |   |           |           |           |
|---|-----------|-----------|-----------|---|-----------|-----------|-----------|
| N | -3.258955 | 1.828844  | 0.315171  | C | -0.412331 | -1.070776 | -0.587610 |
| H | -3.880867 | 2.428674  | 0.850946  | H | -0.886059 | -0.223108 | -1.078000 |
| C | 2.442778  | 1.979943  | -1.104081 | O | 0.096424  | -0.674995 | 0.715623  |
| H | 2.728273  | 1.565130  | -2.080186 | C | 2.504930  | -0.687451 | 1.121311  |
| C | -1.387553 | 0.230192  | -0.897496 | C | 3.807366  | -1.034977 | 0.736544  |
| H | -0.838626 | -0.031145 | -1.803476 | C | 2.204975  | -0.604823 | 2.491231  |
| O | -2.570560 | -1.427165 | -0.272928 | C | 4.785478  | -1.295448 | 1.701101  |
| C | 3.562520  | -1.902153 | 0.781617  | H | 4.058140  | -1.111470 | -0.312852 |
| H | 4.388205  | -2.139323 | 0.100369  | C | 3.184834  | -0.859615 | 3.454481  |
| C | 2.254685  | -2.113993 | 0.021101  | H | 1.199045  | -0.345003 | 2.805247  |
| C | 1.044358  | -2.070369 | 0.651576  | C | 4.481469  | -1.206131 | 3.062747  |
| C | 2.319987  | -2.288554 | -1.434802 | H | 5.787986  | -1.571067 | 1.383078  |
| C | -0.185920 | -2.007626 | -0.129689 | H | 2.931558  | -0.789642 | 4.509378  |
| H | 0.992962  | -1.930374 | 1.726228  | H | 5.244806  | -1.408407 | 3.809776  |
| C | 1.164747  | -2.626670 | -2.151347 | C | -2.821551 | -1.885235 | -0.617310 |
| H | 3.286988  | -2.279785 | -1.926540 | H | -3.214407 | -2.536172 | -1.404130 |
| C | -0.066784 | -2.607584 | -1.508443 | C | 1.439953  | -2.764927 | -0.874747 |
| H | 1.259439  | -2.997922 | -3.167607 | O | 2.573342  | -3.177211 | -1.083529 |
| C | -1.235448 | -0.967187 | 0.169410  | C | 1.015006  | -1.318807 | -1.103024 |
| C | -1.277024 | -0.559523 | 1.638032  | C | 1.302747  | -0.941477 | -2.556181 |
| C | -2.240244 | -1.125526 | 2.486387  | H | 2.360436  | -1.067319 | -2.793622 |
| C | -0.348439 | 0.345312  | 2.175653  | H | 0.718860  | -1.586050 | -3.224201 |
| C | -2.280299 | -0.790085 | 3.843081  | H | 1.015355  | 0.094237  | -2.751917 |
| H | -2.964730 | -1.822964 | 2.078790  | C | 1.400813  | -0.349708 | 0.127639  |
| C | -0.393630 | 0.685305  | 3.531198  | C | 1.385061  | 1.140457  | -0.283706 |
| H | 0.414109  | 0.778794  | 1.537584  | C | 0.270136  | 1.901605  | 0.077532  |
| C | -1.359343 | 0.120633  | 4.370092  | C | 2.380593  | 1.761969  | -1.067023 |
| H | -3.033705 | -1.238878 | 4.485604  | C | 0.052745  | 3.212778  | -0.356774 |
| H | 0.330434  | 1.391441  | 3.930047  | H | -0.466811 | 1.405183  | 0.693462  |
| H | -1.392537 | 0.386395  | 5.423586  | C | 2.205183  | 3.090915  | -1.481907 |
| C | 0.148732  | 2.128601  | -1.171776 | C | 1.047346  | 3.798163  | -1.147413 |
| H | 0.077228  | 1.947766  | -2.255640 | H | 2.955857  | 3.575645  | -2.095249 |
| C | -3.797791 | 0.660919  | -0.168837 | H | 0.930290  | 4.810182  | -1.526506 |
| O | -4.957163 | 0.344424  | 0.068690  | C | -2.193068 | 3.085090  | 0.775451  |
| C | -2.855114 | -0.205633 | -1.005187 | O | -2.363272 | 3.177184  | 1.977848  |
| C | -3.441273 | -0.464060 | -2.382606 | C | -1.250177 | 3.963529  | -0.042256 |
| H | -2.775305 | -1.117232 | -2.951973 | H | -1.755575 | 4.158954  | -0.997729 |
| H | -4.420964 | -0.943257 | -2.291602 | C | -1.011841 | 5.304480  | 0.673255  |
| H | -3.567262 | 0.478925  | -2.927575 | H | -0.509449 | 5.152259  | 1.633214  |
| C | 3.643425  | -0.400282 | 1.069477  | H | -0.387092 | 5.956276  | 0.055763  |
| O | 3.539448  | 0.115594  | 2.166492  | H | -1.960316 | 5.820358  | 0.856959  |

|   |           |           |           |   |          |          |           |
|---|-----------|-----------|-----------|---|----------|----------|-----------|
| O | -1.184124 | -3.219584 | -1.957928 | O | 3.462458 | 1.006369 | -1.407506 |
| C | -1.123448 | -3.950848 | -3.192061 | C | 4.479124 | 1.575523 | -2.235073 |
| H | -2.113510 | -4.387585 | -3.322509 | H | 4.075882 | 1.863903 | -3.212799 |
| H | -0.899790 | -3.278759 | -4.027271 | H | 4.941176 | 2.443940 | -1.751840 |
| H | -0.366623 | -4.740455 | -3.133697 | H | 5.224883 | 0.790041 | -2.363892 |

### HT-3-S<sub>1,min</sub>

|   |           |           |           |
|---|-----------|-----------|-----------|
| O | -2.796000 | 2.109087  | -0.061555 |
| C | -3.547529 | 1.161761  | 0.741302  |
| H | -2.879430 | 0.771779  | 1.514821  |
| H | -4.374546 | 1.685559  | 1.229013  |
| O | -3.102460 | -0.576770 | -0.964030 |
| C | -4.661526 | -1.079962 | 0.757922  |
| C | -3.466520 | -2.037741 | 0.851059  |
| H | -4.977706 | -0.707492 | 1.739930  |
| H | -3.762249 | -3.061824 | 1.086506  |
| H | -2.761843 | -1.699487 | 1.619225  |
| O | -5.778479 | -1.655586 | 0.071348  |
| H | -6.121412 | -2.392661 | 0.603358  |
| N | -1.379383 | -2.153613 | -0.639619 |
| C | -0.920428 | -3.454338 | -0.439884 |
| O | -1.692604 | -4.392032 | -0.140106 |
| N | 0.419601  | -3.610616 | -0.618604 |
| H | 0.748675  | -4.566843 | -0.546509 |
| C | -4.105336 | 0.042186  | -0.134756 |
| H | -4.879372 | 0.435617  | -0.800441 |
| C | -0.468671 | -1.068454 | -0.657126 |
| H | -0.980256 | -0.211420 | -1.090073 |
| O | 0.058171  | -0.693101 | 0.671221  |
| C | 2.458458  | -0.765561 | 1.094179  |
| C | 3.551078  | -1.567384 | 0.740306  |
| C | 2.368792  | -0.279797 | 2.411371  |
| C | 4.533388  | -1.875555 | 1.688190  |
| H | 3.621170  | -1.969512 | -0.265126 |
| C | 3.349240  | -0.590287 | 3.357205  |
| H | 1.523095  | 0.338613  | 2.701722  |
| C | 4.439377  | -1.388797 | 2.996273  |
| H | 5.373621  | -2.503549 | 1.401502  |
| H | 3.262133  | -0.207100 | 4.370854  |

### HT-3-T<sub>1,min</sub>

|   |           |           |           |
|---|-----------|-----------|-----------|
| O | -2.957523 | 1.986063  | 0.044982  |
| C | -3.679794 | 1.036993  | 0.858849  |
| H | -2.998622 | 0.657329  | 1.626618  |
| H | -4.516858 | 1.537499  | 1.354955  |
| O | -3.192842 | -0.607443 | -0.912409 |
| C | -4.672892 | -1.274362 | 0.824350  |
| C | -3.414368 | -2.153426 | 0.858570  |
| H | -4.990860 | -0.962433 | 1.826407  |
| H | -3.638619 | -3.205344 | 1.049630  |
| H | -2.723030 | -1.803880 | 1.633208  |
| O | -5.760458 | -1.896935 | 0.134112  |
| H | -6.063058 | -2.659398 | 0.654652  |
| N | -1.340273 | -2.034748 | -0.636596 |
| C | -0.814848 | -3.292390 | -0.742380 |
| O | -1.476971 | -4.324733 | -0.646450 |
| N | 0.558686  | -3.357590 | -1.008320 |
| H | 0.902810  | -4.302591 | -1.156621 |
| C | -4.209582 | -0.084345 | -0.030236 |
| H | -5.020710 | 0.285713  | -0.663585 |
| C | -0.490842 | -0.887362 | -0.547173 |
| H | -1.081527 | -0.014630 | -0.819082 |
| O | 0.113537  | -0.698761 | 0.760764  |
| C | 2.542447  | -0.955322 | 0.925507  |
| C | 3.782065  | -1.227512 | 0.330124  |
| C | 2.360450  | -1.264985 | 2.283155  |
| C | 4.813593  | -1.806010 | 1.074458  |
| H | 3.946166  | -0.998817 | -0.715816 |
| C | 3.393894  | -1.838585 | 3.028477  |
| H | 1.403694  | -1.063656 | 2.754346  |
| C | 4.625901  | -2.112094 | 2.425952  |
| H | 5.765452  | -2.018029 | 0.593903  |
| H | 3.233414  | -2.073403 | 4.077692  |



|   |           |           |           |   |           |           |           |
|---|-----------|-----------|-----------|---|-----------|-----------|-----------|
| H | 5.206255  | -1.631240 | 3.727661  | H | 5.430321  | -2.561812 | 3.002363  |
| C | -2.834448 | -1.920511 | -0.542705 | C | -2.815997 | -1.927097 | -0.536378 |
| H | -3.312867 | -2.614893 | -1.239872 | H | -3.220916 | -2.641127 | -1.258143 |
| C | 1.328160  | -2.704572 | -1.253805 | C | 1.377037  | -2.338645 | -1.470329 |
| O | 2.441762  | -3.171179 | -1.695805 | O | 2.434546  | -2.605348 | -2.031018 |
| C | 0.947969  | -1.265206 | -1.231151 | C | 0.881171  | -0.923381 | -1.246113 |
| C | 1.219291  | -0.616099 | -2.592742 | C | 1.021965  | -0.116259 | -2.534381 |
| H | 2.284484  | -0.659328 | -2.836528 | H | 2.061135  | -0.094167 | -2.872022 |
| H | 0.680577  | -1.169759 | -3.370037 | H | 0.418757  | -0.575068 | -3.326927 |
| H | 0.887420  | 0.426011  | -2.639940 | H | 0.673880  | 0.909120  | -2.394961 |
| C | 1.360843  | -0.369584 | 0.120804  | C | 1.391127  | -0.293759 | 0.174312  |
| C | 1.387568  | 1.133773  | -0.167049 | C | 1.484335  | 1.229468  | 0.206561  |
| C | 0.269260  | 1.897703  | 0.109335  | C | 0.267187  | 1.996742  | 0.492534  |
| C | 2.487230  | 1.804786  | -0.826800 | C | 2.555557  | 2.021846  | -0.486834 |
| C | 0.097301  | 3.214630  | -0.360979 | C | -0.087462 | 3.036806  | -0.311402 |
| H | -0.530939 | 1.397925  | 0.633949  | H | -0.387347 | 1.638850  | 1.279473  |
| C | 2.364845  | 3.161744  | -1.242812 | C | 2.194991  | 3.075392  | -1.308215 |
| C | 1.186386  | 3.841703  | -1.036013 | C | 0.852976  | 3.507059  | -1.334098 |
| H | 3.191400  | 3.652409  | -1.740761 | H | 2.940078  | 3.624618  | -1.875993 |
| H | 1.092885  | 4.857880  | -1.400138 | H | 0.553518  | 4.300746  | -2.010947 |
| C | -2.215915 | 3.114625  | 0.624050  | C | -2.378760 | 3.011128  | 0.706011  |
| O | -2.415779 | 3.323784  | 1.804897  | O | -2.587229 | 3.241339  | 1.883766  |
| C | -1.242495 | 3.924661  | -0.237073 | C | -1.414125 | 3.784500  | -0.182400 |
| H | -1.662394 | 3.963553  | -1.253253 | H | -1.858260 | 3.820888  | -1.186550 |
| C | -1.118247 | 5.365974  | 0.299619  | C | -1.224349 | 5.226269  | 0.327153  |
| H | -0.663441 | 5.375420  | 1.293557  | H | -0.800824 | 5.228756  | 1.335730  |
| H | -0.515079 | 5.981944  | -0.371372 | H | -0.548799 | 5.776090  | -0.334553 |
| H | -2.111186 | 5.819116  | 0.367767  | H | -2.183399 | 5.754641  | 0.351126  |
| O | 3.564024  | 1.076477  | -1.028726 | O | 3.816578  | 1.676809  | -0.159550 |
| C | 4.743444  | 1.608914  | -1.683451 | C | 4.907633  | 2.434272  | -0.705092 |
| H | 4.491814  | 1.923335  | -2.698101 | H | 5.810498  | 1.992165  | -0.284236 |
| H | 5.143132  | 2.439198  | -1.098160 | H | 4.923641  | 2.351135  | -1.796709 |
| H | 5.446348  | 0.779245  | -1.701558 | H | 4.827609  | 3.485610  | -0.409022 |

#### HH-4-S<sub>0</sub>

|   |          |           |          |
|---|----------|-----------|----------|
| C | 3.285171 | -4.010466 | 1.190831 |
| H | 2.971701 | -4.974921 | 0.780766 |
| H | 4.339514 | -4.085897 | 1.475811 |
| H | 2.696861 | -3.807852 | 2.090559 |

#### HH-4-S<sub>1,min</sub>

|   |          |           |          |
|---|----------|-----------|----------|
| C | 4.146132 | -2.147177 | 2.052315 |
| H | 4.222670 | -3.229084 | 1.913548 |
| H | 5.066840 | -1.784646 | 2.517027 |
| H | 3.310930 | -1.937590 | 2.726996 |

|   |           |           |           |   |           |           |           |
|---|-----------|-----------|-----------|---|-----------|-----------|-----------|
| O | 3.842301  | -0.703963 | -0.340247 | O | 3.406625  | 0.655256  | -0.251697 |
| C | 4.100083  | 0.685372  | -0.023763 | C | 3.106782  | 2.072646  | -0.214974 |
| H | 3.913130  | 0.855963  | 1.037723  | H | 2.810153  | 2.347900  | 0.799888  |
| H | 5.150400  | 0.890342  | -0.249676 | H | 4.002947  | 2.632999  | -0.497832 |
| O | 1.828259  | 1.197721  | -0.620034 | O | 0.849845  | 1.516189  | -0.849586 |
| C | 3.326115  | 3.060579  | -0.635498 | C | 1.498052  | 3.784469  | -1.252542 |
| C | 1.903105  | 3.475403  | -0.204110 | C | 0.034829  | 3.690680  | -0.774231 |
| H | 4.056624  | 3.282122  | 0.151261  | H | 2.087290  | 4.431974  | -0.592904 |
| H | 1.652457  | 4.484421  | -0.534428 | H | -0.597829 | 4.453746  | -1.230047 |
| H | 1.807782  | 3.426229  | 0.882491  | H | -0.011567 | 3.799498  | 0.311116  |
| O | 3.746420  | 3.662948  | -1.864195 | O | 1.624494  | 4.234048  | -2.605419 |
| H | 3.940453  | 4.600148  | -1.699043 | H | 1.422958  | 5.183813  | -2.636497 |
| N | -0.302131 | 2.104056  | -0.373645 | N | -1.446757 | 1.568610  | -0.528530 |
| C | -1.066190 | 3.087802  | 0.207619  | C | -2.460854 | 2.222020  | 0.126428  |
| O | -0.637565 | 4.121879  | 0.706902  | O | -2.496034 | 3.424115  | 0.364296  |
| N | -2.456757 | 2.866607  | 0.219203  | N | -3.536815 | 1.420208  | 0.555615  |
| H | -2.974969 | 3.578756  | 0.727633  | H | -4.210870 | 1.921710  | 1.128367  |
| C | 3.198836  | 1.538035  | -0.896438 | C | 1.989728  | 2.315469  | -1.215740 |
| H | 3.408848  | 1.347407  | -1.956987 | H | 2.320230  | 2.029649  | -2.222137 |
| C | -0.910167 | 0.898018  | -0.911264 | C | -1.517468 | 0.153205  | -0.814051 |
| H | -0.295778 | 0.557903  | -1.743693 | H | -1.059156 | -0.025398 | -1.786999 |
| O | -2.613718 | -0.359623 | -0.706652 | O | -2.231727 | -1.721472 | -0.127968 |
| C | 3.087818  | -2.899661 | 0.142477  | C | 3.956353  | -1.453906 | 0.685962  |
| H | 3.688279  | -3.137599 | -0.744469 | H | 4.819364  | -1.695334 | 0.052786  |
| C | 1.626461  | -2.803480 | -0.306148 | C | 2.704388  | -1.914530 | -0.018069 |
| C | 0.806791  | -1.722277 | 0.030222  | C | 1.443042  | -1.460309 | 0.448274  |
| C | 1.076825  | -3.847559 | -1.064871 | C | 2.764669  | -2.763131 | -1.149836 |
| C | -0.546370 | -1.644427 | -0.331990 | C | 0.258439  | -1.689443 | -0.228533 |
| H | 1.229421  | -0.884133 | 0.566913  | H | 1.426986  | -0.852361 | 1.343484  |
| C | -0.264391 | -3.818239 | -1.426670 | C | 1.604221  | -3.065085 | -1.818086 |
| H | 1.689444  | -4.692429 | -1.366290 | H | 3.719821  | -3.146389 | -1.494376 |
| C | -1.062963 | -2.740737 | -1.034984 | C | 0.357270  | -2.508754 | -1.401143 |
| H | -0.704874 | -4.635146 | -1.989012 | H | 1.605831  | -3.701772 | -2.695815 |
| C | -1.324183 | -0.362883 | -0.019971 | C | -1.020209 | -0.976325 | 0.205617  |
| C | -1.492099 | -0.145716 | 1.482307  | C | -1.030097 | -0.612526 | 1.691320  |
| C | -2.685739 | -0.547402 | 2.100505  | C | -1.691602 | -1.466613 | 2.587664  |
| C | -0.471050 | 0.407781  | 2.270097  | C | -0.379736 | 0.525028  | 2.195218  |
| C | -2.855237 | -0.398715 | 3.479335  | C | -1.706471 | -1.187340 | 3.956451  |
| H | -3.480996 | -0.973428 | 1.498285  | H | -2.204178 | -2.344828 | 2.209622  |
| C | -0.643726 | 0.557247  | 3.649595  | C | -0.401507 | 0.806534  | 3.564755  |
| H | 0.457393  | 0.738537  | 1.817189  | H | 0.152097  | 1.189219  | 1.523541  |

|   |           |           |           |   |           |           |           |
|---|-----------|-----------|-----------|---|-----------|-----------|-----------|
| C | -1.834904 | 0.154387  | 4.259471  | C | -1.064928 | -0.047151 | 4.450050  |
| H | -3.786341 | -0.715112 | 3.942303  | H | -2.223988 | -1.860083 | 4.635242  |
| H | 0.154888  | 0.993864  | 4.243601  | H | 0.103798  | 1.694420  | 3.935612  |
| H | -1.967687 | 0.272367  | 5.331631  | H | -1.081267 | 0.173253  | 5.514074  |
| C | 1.059088  | 2.379155  | -0.855332 | C | -0.329358 | 2.263368  | -1.179956 |
| H | 0.995153  | 2.544627  | -1.942797 | H | -0.493208 | 2.200050  | -2.266556 |
| C | -3.200372 | 1.972778  | -0.513628 | C | -3.822011 | 0.103338  | 0.274593  |
| O | -4.423320 | 1.993924  | -0.508026 | O | -4.792935 | -0.463595 | 0.755231  |
| C | -2.394573 | 0.943557  | -1.311007 | C | -2.874363 | -0.561235 | -0.728263 |
| C | -2.755611 | 0.978302  | -2.783842 | C | -3.627583 | -0.885285 | -2.007170 |
| H | -2.211731 | 0.194074  | -3.317990 | H | -2.951887 | -1.338547 | -2.735173 |
| H | -3.830780 | 0.821500  | -2.911859 | H | -4.448608 | -1.574646 | -1.786022 |
| H | -2.492402 | 1.949376  | -3.218715 | H | -4.053803 | 0.029193  | -2.436236 |
| C | 3.594430  | -1.561354 | 0.670025  | C | 3.948828  | 0.079359  | 0.834261  |
| O | 3.734845  | -1.283968 | 1.846681  | O | 4.371469  | 0.688567  | 1.794697  |
| N | -2.497423 | -2.895429 | -1.346921 | N | -0.752246 | -2.778160 | -2.248464 |
| O | -3.275720 | -3.001523 | -0.400374 | O | -1.158479 | -4.010268 | -2.282496 |
| O | -2.820940 | -2.998737 | -2.531491 | O | -0.686270 | -2.039739 | -3.334924 |

#### HH-4-T<sub>1,min</sub>

|   |           |           |           |
|---|-----------|-----------|-----------|
| C | -3.831181 | 3.011591  | 1.750542  |
| H | -3.707944 | 4.068115  | 1.493001  |
| H | -4.839360 | 2.867491  | 2.151167  |
| H | -3.109394 | 2.759577  | 2.533675  |
| O | -3.752925 | -0.073340 | -0.326639 |
| C | -3.682865 | -1.514468 | -0.217314 |
| H | -3.468298 | -1.790166 | 0.817009  |
| H | -4.652793 | -1.926102 | -0.512007 |
| O | -1.337794 | -1.432827 | -0.757058 |
| C | -2.404954 | -3.533541 | -1.171561 |
| C | -0.944888 | -3.718732 | -0.708510 |
| H | -3.100511 | -4.038782 | -0.491309 |
| H | -0.471292 | -4.585377 | -1.172884 |
| H | -0.907633 | -3.837198 | 0.375678  |
| O | -2.638298 | -3.978261 | -2.512416 |
| H | -2.636773 | -4.949469 | -2.521131 |
| N | 0.923371  | -1.917013 | -0.504557 |
| C | 1.806441  | -2.765103 | 0.115678  |
| O | 1.576647  | -3.924520 | 0.441082  |

#### HT-4-S<sub>0</sub>

|   |           |           |           |
|---|-----------|-----------|-----------|
| O | -2.752530 | 2.267502  | -0.028634 |
| C | -3.537426 | 1.355232  | 0.777300  |
| H | -2.884210 | 0.912973  | 1.535216  |
| H | -4.329673 | 1.915046  | 1.283411  |
| O | -3.167174 | -0.383677 | -0.931212 |
| C | -4.839897 | -0.803909 | 0.706613  |
| C | -3.737928 | -1.867623 | 0.812252  |
| H | -5.159742 | -0.439317 | 1.689787  |
| H | -4.133934 | -2.869565 | 0.988720  |
| H | -3.046696 | -1.622337 | 1.626036  |
| O | -5.972049 | -1.256610 | -0.042359 |
| H | -6.422534 | -1.952306 | 0.464437  |
| N | -1.579287 | -2.081306 | -0.541642 |
| C | -1.237061 | -3.394918 | -0.401830 |
| O | -2.045717 | -4.299619 | -0.208715 |
| N | 0.130867  | -3.686715 | -0.519770 |
| H | 0.343009  | -4.679418 | -0.461367 |
| C | -4.158140 | 0.294393  | -0.124992 |
| H | -4.869048 | 0.757554  | -0.815075 |

|   |           |           |           |   |           |           |           |
|---|-----------|-----------|-----------|---|-----------|-----------|-----------|
| N | 3.080975  | -2.233733 | 0.396367  | C | -0.582059 | -1.068094 | -0.631078 |
| H | 3.669477  | -2.861200 | 0.938512  | H | -1.023863 | -0.214138 | -1.141104 |
| C | -2.598626 | -1.995385 | -1.163931 | O | -0.031989 | -0.663020 | 0.649708  |
| H | -2.824120 | -1.669283 | -2.187747 | C | 2.325071  | -0.833764 | 1.135613  |
| C | 1.294296  | -0.557942 | -0.852835 | C | 3.389769  | -1.730506 | 0.982422  |
| H | 0.775130  | -0.299362 | -1.775949 | C | 2.151601  | -0.202221 | 2.382202  |
| O | 2.538718  | 1.068908  | -0.297371 | C | 4.254086  | -1.993594 | 2.052352  |
| C | -3.615402 | 2.143157  | 0.499593  | H | 3.554084  | -2.225686 | 0.036160  |
| H | -4.358627 | 2.423329  | -0.257772 | C | 3.012616  | -0.466530 | 3.447323  |
| C | -2.234082 | 2.354309  | -0.113919 | H | 1.332459  | 0.497072  | 2.523371  |
| C | -1.138525 | 1.597329  | 0.314157  | C | 4.071684  | -1.366832 | 3.285992  |
| C | -2.036018 | 3.320119  | -1.108155 | H | 5.073946  | -2.693313 | 1.911212  |
| C | 0.142873  | 1.717909  | -0.236977 | H | 2.856324  | 0.031432  | 4.400720  |
| H | -1.295165 | 0.849363  | 1.080546  | H | 4.745689  | -1.574601 | 4.112955  |
| C | -0.768380 | 3.515044  | -1.641649 | C | -3.030140 | -1.745572 | -0.543307 |
| H | -2.865917 | 3.926568  | -1.460660 | H | -3.497719 | -2.387893 | -1.295502 |
| C | 0.308469  | 2.723287  | -1.215187 | C | 1.146878  | -2.886041 | -1.007360 |
| H | -0.594422 | 4.275500  | -2.394660 | O | 2.215662  | -3.383437 | -1.336004 |
| C | 1.202373  | 0.682249  | 0.151471  | C | 0.822174  | -1.401959 | -1.169992 |
| C | 1.220794  | 0.381207  | 1.649600  | C | 1.078189  | -1.004403 | -2.625161 |
| C | 2.117152  | 1.091897  | 2.463539  | H | 2.096611  | -1.244847 | -2.929249 |
| C | 0.359745  | -0.552614 | 2.246485  | H | 0.383149  | -1.552344 | -3.273104 |
| C | 2.150826  | 0.875799  | 3.842959  | H | 0.901349  | 0.063572  | -2.776639 |
| H | 2.795663  | 1.808737  | 2.012481  | C | 1.299184  | -0.467926 | 0.061880  |
| C | 0.398128  | -0.771257 | 3.627613  | C | 1.425409  | 1.027125  | -0.357218 |
| H | -0.342437 | -1.114796 | 1.640782  | C | 0.315273  | 1.839733  | -0.099534 |
| C | 1.292138  | -0.058965 | 4.430676  | C | 2.528044  | 1.681391  | -0.946152 |
| H | 2.851130  | 1.436161  | 4.456900  | C | 0.216945  | 3.187211  | -0.463865 |
| H | -0.273257 | -1.501907 | 4.071160  | H | -0.512303 | 1.364073  | 0.403051  |
| H | 1.320828  | -0.230656 | 5.503424  | C | 2.482388  | 3.038536  | -1.285715 |
| C | -0.326861 | -2.381383 | -1.116171 | C | 1.329011  | 3.783744  | -1.073578 |
| H | -0.185088 | -2.345484 | -2.207900 | H | 3.352235  | 3.493645  | -1.743526 |
| C | 3.664853  | -1.072408 | -0.049228 | H | 1.310218  | 4.821024  | -1.389526 |
| O | 4.812375  | -0.770742 | 0.248065  | C | -2.043814 | 3.194822  | 0.650297  |
| C | 2.785757  | -0.203919 | -0.953518 | O | -2.141657 | 3.355881  | 1.852302  |
| C | 3.417607  | -0.054037 | -2.326329 | C | -1.087742 | 3.969621  | -0.255842 |
| H | 2.800882  | 0.593085  | -2.955412 | H | -1.571424 | 4.043274  | -1.239137 |
| H | 4.416771  | 0.382103  | -2.233898 | C | -0.869577 | 5.389004  | 0.297692  |
| H | 3.510523  | -1.032733 | -2.811038 | H | -0.355122 | 5.360221  | 1.262467  |
| C | -3.845743 | 0.661431  | 0.798851  | H | -0.277474 | 5.989904  | -0.397106 |
| O | -4.062864 | 0.192375  | 1.900502  | H | -1.832177 | 5.891517  | 0.434308  |

|   |          |          |           |
|---|----------|----------|-----------|
| N | 1.579969 | 2.991333 | -1.836653 |
| O | 2.498604 | 3.684026 | -1.201726 |
| O | 1.615395 | 3.426247 | -3.066107 |

|   |          |           |           |
|---|----------|-----------|-----------|
| N | 3.778823 | 0.992409  | -1.260679 |
| O | 4.812180 | 1.664997  | -1.357669 |
| O | 3.746622 | -0.229240 | -1.421639 |

HT-4-S<sub>1,min</sub>

|   |           |           |           |
|---|-----------|-----------|-----------|
| O | -2.778484 | 2.216351  | -0.003257 |
| C | -3.606609 | 1.300199  | 0.758108  |
| H | -2.990731 | 0.855199  | 1.544893  |
| H | -4.420153 | 1.860875  | 1.227383  |
| O | -3.167976 | -0.422152 | -0.954455 |
| C | -4.886690 | -0.866809 | 0.626942  |
| C | -3.776868 | -1.919396 | 0.765374  |
| H | -5.244229 | -0.511282 | 1.600480  |
| H | -4.168092 | -2.926663 | 0.921477  |
| H | -3.117894 | -1.672648 | 1.605034  |
| O | -5.986111 | -1.326680 | -0.164094 |
| H | -6.446664 | -2.030693 | 0.321730  |
| N | -1.566642 | -2.092876 | -0.510719 |
| C | -1.203055 | -3.406072 | -0.401235 |
| O | -2.000339 | -4.326765 | -0.246791 |
| N | 0.172090  | -3.670231 | -0.497207 |
| H | 0.406959  | -4.657389 | -0.431338 |
| C | -4.187543 | 0.243312  | -0.174982 |
| H | -4.878946 | 0.706730  | -0.884140 |
| C | -0.587377 | -1.066241 | -0.567586 |
| H | -1.040911 | -0.198425 | -1.041722 |
| O | -0.027541 | -0.691893 | 0.729331  |
| C | 2.379343  | -0.843140 | 1.104766  |
| C | 3.619057  | -1.365271 | 0.704610  |
| C | 2.130791  | -0.634844 | 2.475866  |
| C | 4.577243  | -1.703009 | 1.660069  |
| H | 3.832713  | -1.519672 | -0.345282 |
| C | 3.094406  | -0.965665 | 3.427024  |
| H | 1.176193  | -0.228398 | 2.794178  |
| C | 4.322130  | -1.503233 | 3.022179  |
| H | 5.528370  | -2.118760 | 1.339149  |
| H | 2.887347  | -0.806607 | 4.481617  |
| H | 5.075539  | -1.761106 | 3.761475  |
| C | -3.022876 | -1.782056 | -0.563257 |

HT-4-T<sub>1,min</sub>

|   |           |           |           |
|---|-----------|-----------|-----------|
| O | -2.900895 | 2.151901  | -0.014768 |
| C | -3.609452 | 1.224373  | 0.841612  |
| H | -2.911618 | 0.852282  | 1.597618  |
| H | -4.423103 | 1.749978  | 1.350419  |
| O | -3.191648 | -0.524083 | -0.849814 |
| C | -4.720436 | -1.036674 | 0.902404  |
| C | -3.533269 | -2.009934 | 0.947530  |
| H | -4.995426 | -0.671021 | 1.898767  |
| H | -3.835617 | -3.034461 | 1.175699  |
| H | -2.802951 | -1.689894 | 1.699057  |
| O | -5.864433 | -1.595277 | 0.250104  |
| H | -6.221202 | -2.308608 | 0.804905  |
| N | -1.482372 | -2.120492 | -0.576312 |
| C | -1.061302 | -3.419384 | -0.603076 |
| O | -1.801967 | -4.387061 | -0.453454 |
| N | 0.307347  | -3.611397 | -0.853089 |
| H | 0.574282  | -4.589310 | -0.934085 |
| C | -4.187344 | 0.090165  | 0.000351  |
| H | -4.977010 | 0.470335  | -0.653959 |
| C | -0.554765 | -1.043413 | -0.596339 |
| H | -1.073452 | -0.174655 | -0.993308 |
| O | 0.031113  | -0.727831 | 0.704867  |
| C | 2.442166  | -0.756468 | 1.040118  |
| C | 2.993268  | -2.061773 | 1.182527  |
| C | 2.759824  | 0.201434  | 2.051049  |
| C | 3.846981  | -2.364014 | 2.231339  |
| H | 2.789828  | -2.828570 | 0.451746  |
| C | 3.610103  | -0.109677 | 3.100466  |
| H | 2.322617  | 1.192342  | 2.000498  |
| C | 4.164902  | -1.394222 | 3.196095  |
| H | 4.271184  | -3.360899 | 2.304653  |
| H | 3.838639  | 0.641758  | 3.850129  |
| H | 4.834079  | -1.640153 | 4.015461  |
| C | -2.943399 | -1.870595 | -0.460535 |

|   |           |           |           |   |           |           |           |
|---|-----------|-----------|-----------|---|-----------|-----------|-----------|
| H | -3.450407 | -2.430404 | -1.333452 | H | -3.427739 | -2.553172 | -1.164146 |
| C | 1.185735  | -2.837536 | -0.933034 | C | 1.244611  | -2.695066 | -1.291484 |
| O | 2.290258  | -3.289625 | -1.199118 | O | 2.315635  | -3.078145 | -1.745683 |
| C | 0.818378  | -1.366569 | -1.115940 | C | 0.841064  | -1.226717 | -1.225277 |
| C | 1.095872  | -0.955867 | -2.560571 | C | 1.058852  | -0.625593 | -2.616940 |
| H | 2.155713  | -1.048519 | -2.801604 | H | 2.119014  | -0.643743 | -2.880490 |
| H | 0.519937  | -1.596592 | -3.238303 | H | 0.514356  | -1.213583 | -3.364335 |
| H | 0.789122  | 0.078399  | -2.739162 | H | 0.692797  | 0.401631  | -2.664937 |
| C | 1.278563  | -0.454876 | 0.128438  | C | 1.310111  | -0.388308 | 0.081184  |
| C | 1.370882  | 1.045907  | -0.238861 | C | 1.340019  | 1.113240  | -0.252465 |
| C | 0.286569  | 1.849421  | 0.092364  | C | 0.182310  | 1.863547  | -0.052017 |
| C | 2.452920  | 1.680832  | -0.937858 | C | 2.450461  | 1.773283  | -0.829832 |
| C | 0.140107  | 3.170103  | -0.364119 | C | 0.029844  | 3.190658  | -0.470512 |
| H | -0.501332 | 1.389831  | 0.669822  | H | -0.633910 | 1.359649  | 0.443713  |
| C | 2.333471  | 3.022908  | -1.383806 | C | 2.332881  | 3.115657  | -1.247018 |
| C | 1.197356  | 3.750621  | -1.126864 | C | 1.134668  | 3.801797  | -1.088962 |
| H | 3.164152  | 3.455041  | -1.930965 | H | 3.190311  | 3.600670  | -1.698779 |
| H | 1.106610  | 4.763181  | -1.503771 | H | 1.074728  | 4.823924  | -1.448961 |
| C | -2.141486 | 3.162257  | 0.715234  | C | -2.236875 | 3.147013  | 0.616047  |
| O | -2.323063 | 3.336116  | 1.904304  | O | -2.341879 | 3.356962  | 1.810223  |
| C | -1.139954 | 3.954838  | -0.128727 | C | -1.316302 | 3.919319  | -0.327162 |
| H | -1.596609 | 4.105810  | -1.118252 | H | -1.796804 | 3.912060  | -1.314920 |
| C | -0.876661 | 5.339492  | 0.504100  | C | -1.180396 | 5.377374  | 0.144963  |
| H | -0.396525 | 5.237191  | 1.480582  | H | -0.679136 | 5.431678  | 1.115789  |
| H | -0.239069 | 5.947680  | -0.141703 | H | -0.607364 | 5.965096  | -0.576952 |
| H | -1.825369 | 5.867228  | 0.635488  | H | -2.168256 | 5.839851  | 0.239508  |
| N | 3.692011  | 1.023386  | -1.187175 | N | 3.686637  | 1.148621  | -0.969092 |
| O | 4.655681  | 1.505278  | -0.446504 | O | 4.672905  | 1.640600  | -1.619738 |
| O | 3.896305  | 0.664645  | -2.424079 | O | 3.876085  | -0.130372 | -0.595241 |

### HH-5-S<sub>0</sub>

|   |          |           |           |
|---|----------|-----------|-----------|
| C | 4.344469 | -2.986608 | 0.322373  |
| H | 4.517817 | -3.723293 | -0.468493 |
| H | 5.249450 | -2.916515 | 0.934549  |
| H | 3.527161 | -3.346547 | 0.955476  |
| O | 3.628270 | 0.664381  | 0.204275  |
| C | 3.174972 | 1.750483  | 1.044995  |
| H | 2.746322 | 1.343758  | 1.963231  |
| H | 4.036312 | 2.378538  | 1.293556  |

### HH-5-S<sub>1,min</sub>

|   |           |           |           |
|---|-----------|-----------|-----------|
| C | -4.186815 | -3.115406 | -0.216713 |
| H | -4.347742 | -3.820948 | 0.603989  |
| H | -5.072139 | -3.123828 | -0.860443 |
| H | -3.331966 | -3.459279 | -0.806368 |
| O | -3.744166 | 0.567224  | -0.291469 |
| C | -3.286738 | 1.636398  | -1.148923 |
| H | -2.881740 | 1.216248  | -2.071197 |
| H | -4.147317 | 2.269933  | -1.383932 |

|   |           |           |           |   |           |           |           |
|---|-----------|-----------|-----------|---|-----------|-----------|-----------|
| O | 1.027556  | 1.713491  | -0.049876 | O | -1.096155 | 1.620366  | -0.136606 |
| C | 1.582400  | 3.767650  | 1.038441  | C | -1.725703 | 3.691629  | -1.151108 |
| C | 0.066603  | 3.483284  | 1.100133  | C | -0.203298 | 3.450462  | -1.236728 |
| H | 2.008956  | 3.846417  | 2.045309  | H | -2.166367 | 3.775822  | -2.152845 |
| H | -0.525475 | 4.398633  | 1.056577  | H | 0.365562  | 4.380286  | -1.187138 |
| H | -0.178877 | 2.950247  | 2.020895  | H | 0.051452  | 2.932473  | -2.161945 |
| O | 1.912166  | 4.940959  | 0.286570  | O | -2.075821 | 4.825750  | -0.360671 |
| H | 1.667625  | 5.722131  | 0.809386  | H | -1.828363 | 5.619458  | -0.861939 |
| N | -1.293177 | 1.679691  | -0.187967 | N | 1.227311  | 1.713420  | 0.063249  |
| C | -2.465839 | 1.950495  | 0.466136  | C | 2.373846  | 1.981393  | -0.664367 |
| O | -2.618276 | 2.791946  | 1.346549  | O | 2.434392  | 2.731932  | -1.641571 |
| N | -3.582160 | 1.179952  | 0.081480  | N | 3.525850  | 1.367676  | -0.216734 |
| H | -4.403474 | 1.343980  | 0.657935  | H | 4.330595  | 1.545561  | -0.805547 |
| C | 2.152692  | 2.553627  | 0.261029  | C | -2.245985 | 2.440802  | -0.392319 |
| H | 2.598965  | 2.919079  | -0.673409 | H | -2.669536 | 2.783283  | 0.561756  |
| C | -1.223816 | 0.676222  | -1.237456 | C | 1.225695  | 0.782141  | 1.167723  |
| H | -0.504507 | 1.021323  | -1.980431 | H | 0.531118  | 1.153604  | 1.924077  |
| O | -2.063895 | -1.151870 | -1.915402 | O | 2.067283  | -0.965941 | 2.013972  |
| C | 3.997829  | -1.626760 | -0.305814 | C | -3.931047 | -1.709194 | 0.346118  |
| H | 4.841320  | -1.302710 | -0.929873 | H | -4.807723 | -1.385191 | 0.920220  |
| C | 2.762707  | -1.694565 | -1.204810 | C | -2.721809 | -1.660515 | 1.280820  |
| C | 1.491901  | -1.412090 | -0.693487 | C | -1.448593 | -1.400697 | 0.766387  |
| C | 2.884038  | -2.035652 | -2.558596 | C | -2.864942 | -1.866790 | 2.657975  |
| C | 0.356410  | -1.387022 | -1.511916 | C | -0.333438 | -1.268265 | 1.599080  |
| H | 1.389989  | -1.158935 | 0.355172  | H | -1.331621 | -1.259418 | -0.300969 |
| C | 1.750797  | -2.074178 | -3.374670 | C | -1.749435 | -1.796052 | 3.493654  |
| H | 3.862354  | -2.261992 | -2.976883 | H | -3.846740 | -2.074683 | 3.076501  |
| C | 0.494571  | -1.732341 | -2.863910 | C | -0.491648 | -1.479360 | 2.975481  |
| H | 1.848556  | -2.347002 | -4.422373 | H | -1.862665 | -1.965653 | 4.561012  |
| H | -0.374031 | -1.726435 | -3.513124 | H | 0.364629  | -1.394279 | 3.634815  |
| C | -0.973097 | -0.873411 | -0.968533 | C | 0.996346  | -0.785017 | 1.029207  |
| C | -1.320979 | -1.409765 | 0.414921  | C | 1.369874  | -1.431371 | -0.296947 |
| C | -2.152613 | -2.535917 | 0.524477  | C | 2.212782  | -2.553299 | -0.301715 |
| C | -0.806044 | -0.850686 | 1.592758  | C | 0.853645  | -0.981954 | -1.520014 |
| C | -2.457990 | -3.081243 | 1.771399  | C | 2.529190  | -3.201780 | -1.492040 |
| H | -2.567298 | -2.982730 | -0.373634 | H | 2.626045  | -2.910509 | 0.635701  |
| C | -1.119831 | -1.400601 | 2.840460  | C | 1.180983  | -1.635987 | -2.711056 |
| H | -0.156926 | 0.017096  | 1.547673  | H | 0.195282  | -0.120574 | -1.549876 |
| C | -1.950834 | -2.522223 | 2.956001  | C | 2.023056  | -2.753225 | -2.722505 |
| H | -3.103929 | -3.955499 | 1.824669  | H | 3.183851  | -4.070243 | -1.467298 |
| H | -0.707419 | -0.943330 | 3.737415  | H | 0.770803  | -1.265378 | -3.647608 |

|   |           |           |           |   |           |           |           |
|---|-----------|-----------|-----------|---|-----------|-----------|-----------|
| C | -0.122950 | 2.563204  | -0.106480 | C | 0.017473  | 2.520456  | -0.044053 |
| H | -0.084833 | 3.144339  | -1.041782 | H | -0.083741 | 3.092826  | 0.893252  |
| C | -3.746989 | 0.355174  | -1.005431 | C | 3.685028  | 0.427213  | 0.816154  |
| O | -4.807622 | -0.214161 | -1.227155 | O | 4.911597  | 0.257080  | 1.250050  |
| C | -2.524565 | 0.224590  | -1.917641 | C | 2.555898  | 0.389839  | 1.854142  |
| C | -2.841623 | 0.740230  | -3.311018 | C | 2.930768  | 1.015150  | 3.187935  |
| H | -1.971179 | 0.614260  | -3.961196 | H | 2.079234  | 0.981896  | 3.874143  |
| H | -3.688390 | 0.190464  | -3.733254 | H | 3.768371  | 0.475655  | 3.638133  |
| H | -3.102561 | 1.804443  | -3.275583 | H | 3.230993  | 2.058163  | 3.043841  |
| C | 3.819737  | -0.548424 | 0.762850  | C | -3.735744 | -0.692953 | -0.777560 |
| O | 3.822804  | -0.742135 | 1.965194  | O | -3.550678 | -0.969737 | -1.945868 |
| C | -2.304693 | -3.107079 | 4.304050  | C | 2.394094  | -3.445655 | -4.012620 |
| H | -3.359109 | -2.924865 | 4.549866  | H | 3.421538  | -3.201228 | -4.312778 |
| H | -2.154551 | -4.193227 | 4.319238  | H | 2.341620  | -4.535581 | -3.910585 |
| H | -1.696518 | -2.668380 | 5.101679  | H | 1.731933  | -3.147264 | -4.831330 |

#### HH-5- $T_{1,min}$

|   |           |           |           |
|---|-----------|-----------|-----------|
| C | -3.819417 | -3.431860 | 0.408937  |
| H | -3.910992 | -3.965710 | 1.360230  |
| H | -4.703674 | -3.652917 | -0.198421 |
| H | -2.942016 | -3.814682 | -0.119679 |
| O | -3.768825 | 0.194132  | -0.378533 |
| C | -3.368880 | 1.158424  | -1.378713 |
| H | -2.899961 | 0.642520  | -2.218690 |
| H | -4.270911 | 1.673952  | -1.720856 |
| O | -1.228678 | 1.458802  | -0.306816 |
| C | -1.957303 | 3.292558  | -1.661181 |
| C | -0.424869 | 3.130048  | -1.700952 |
| H | -2.388352 | 3.202164  | -2.665151 |
| H | 0.090757  | 4.087728  | -1.796122 |
| H | -0.138804 | 2.492511  | -2.538227 |
| O | -2.387776 | 4.522274  | -1.065873 |
| H | -2.210126 | 5.245516  | -1.689240 |
| N | 1.093080  | 1.687364  | -0.154839 |
| C | 2.201667  | 1.853174  | -0.945257 |
| O | 2.233642  | 2.417729  | -2.034647 |
| N | 3.405903  | 1.330090  | -0.434803 |
| H | 4.187637  | 1.417970  | -1.078892 |
| C | -2.421054 | 2.147884  | -0.724334 |

#### HT-5- $S_0$

|   |           |           |           |
|---|-----------|-----------|-----------|
| O | -3.239755 | 1.574489  | 0.206881  |
| C | -3.609176 | 0.496243  | 1.099182  |
| H | -2.763956 | 0.291693  | 1.763019  |
| H | -4.460312 | 0.811711  | 1.710447  |
| O | -2.971943 | -1.131643 | -0.647836 |
| C | -4.208123 | -1.947998 | 1.212244  |
| C | -2.835932 | -2.635291 | 1.165170  |
| H | -4.487954 | -1.649466 | 2.229386  |
| H | -2.889280 | -3.700366 | 1.400512  |
| H | -2.145850 | -2.160972 | 1.871629  |
| O | -5.243422 | -2.747381 | 0.632057  |
| H | -5.387409 | -3.525349 | 1.195806  |
| N | -0.916093 | -2.274421 | -0.485965 |
| C | -0.189679 | -3.430487 | -0.462008 |
| O | -0.661542 | -4.533583 | -0.194191 |
| N | 1.169915  | -3.304764 | -0.786549 |
| H | 1.680788  | -4.183478 | -0.769193 |
| C | -4.000016 | -0.735790 | 0.288990  |
| H | -4.902372 | -0.532014 | -0.294604 |
| C | -0.276478 | -1.016541 | -0.675665 |
| H | -1.023598 | -0.316676 | -1.042445 |
| O | 0.371369  | -0.481075 | 0.515697  |



|   |           |           |           |   |           |           |           |
|---|-----------|-----------|-----------|---|-----------|-----------|-----------|
| H | -2.903217 | 2.596675  | 0.154359  | C | -2.385850 | -2.375268 | -0.277750 |
| C | 1.158403  | 0.950768  | 1.093442  | H | -2.740805 | -3.160587 | -0.951387 |
| H | 0.418858  | 1.376091  | 1.772641  | C | 1.828247  | -2.232209 | -1.362853 |
| O | 2.229527  | -0.599268 | 2.091723  | O | 2.964656  | -2.365049 | -1.797585 |
| C | -3.709602 | -1.925147 | 0.671584  | C | 1.037997  | -0.933905 | -1.466014 |
| H | -4.619055 | -1.583741 | 1.179453  | C | 0.960887  | -0.505341 | -2.930697 |
| C | -2.511461 | -1.517513 | 1.528616  | H | 1.959314  | -0.337822 | -3.344121 |
| C | -1.239663 | -1.834525 | 1.174529  | H | 0.478090  | -1.290728 | -3.524113 |
| C | -2.748441 | -0.704252 | 2.731410  | H | 0.375851  | 0.410555  | -3.038442 |
| C | -0.104619 | -1.238033 | 1.895736  | C | 1.426649  | 0.114974  | -0.305099 |
| H | -1.045976 | -2.439159 | 0.293828  | C | 1.017830  | 1.553663  | -0.681592 |
| C | -1.671479 | -0.420578 | 3.624070  | C | -0.212441 | 2.031321  | -0.214596 |
| H | -3.766457 | -0.440911 | 3.000212  | C | 1.770407  | 2.373588  | -1.531853 |
| C | -0.390280 | -0.750073 | 3.287642  | C | -0.756495 | 3.251332  | -0.628359 |
| H | -1.893796 | -0.005916 | 4.605473  | H | -0.757913 | 1.398041  | 0.470306  |
| H | 0.425205  | -0.658666 | 3.997631  | C | 1.260601  | 3.614115  | -1.927962 |
| C | 1.070727  | -0.660105 | 1.168932  | C | 0.000679  | 4.045544  | -1.501943 |
| C | 1.429148  | -1.407255 | -0.107994 | H | 1.843426  | 4.242156  | -2.596696 |
| C | 2.465669  | -2.349924 | -0.100324 | H | -0.385155 | 4.995402  | -1.861496 |
| C | 0.712434  | -1.213255 | -1.298697 | C | -2.751742 | 2.685838  | 0.804574  |
| C | 2.782186  | -3.072413 | -1.254325 | O | -2.752485 | 2.835622  | 2.012887  |
| H | 3.030777  | -2.515316 | 0.811446  | C | -2.168355 | 3.681632  | -0.195198 |
| C | 1.037290  | -1.935612 | -2.449084 | H | -2.806717 | 3.643473  | -1.088024 |
| H | -0.106253 | -0.501469 | -1.327612 | C | -2.214157 | 5.105483  | 0.386495  |
| C | 2.079798  | -2.875655 | -2.451820 | H | -1.579757 | 5.186460  | 1.274100  |
| H | 3.589829  | -3.800740 | -1.219764 | H | -1.868895 | 5.831864  | -0.354176 |
| H | 0.465983  | -1.765672 | -3.359629 | H | -3.237917 | 5.373310  | 0.667916  |
| C | -0.161186 | 2.412568  | -0.376465 | C | 2.771352  | 0.044302  | 0.393562  |
| H | -0.271872 | 3.117796  | 0.462346  | C | 2.815902  | -0.095110 | 1.786354  |
| C | 3.696903  | 0.860741  | 0.823545  | C | 3.984418  | 0.171940  | -0.301102 |
| O | 4.831701  | 0.520137  | 1.134140  | C | 4.038692  | -0.098407 | 2.465741  |
| C | 2.515649  | 0.794224  | 1.792861  | H | 1.891763  | -0.203792 | 2.345026  |
| C | 2.796374  | 1.614512  | 3.040405  | C | 5.200181  | 0.166438  | 0.382432  |
| H | 1.955463  | 1.537833  | 3.735473  | H | 3.993651  | 0.249503  | -1.383336 |
| H | 3.702762  | 1.250387  | 3.533836  | C | 5.252758  | 0.034013  | 1.779855  |
| H | 2.943818  | 2.669550  | 2.781855  | H | 4.042965  | -0.206778 | 3.548268  |
| C | -3.596308 | -1.122167 | -0.624958 | H | 6.125187  | 0.260036  | -0.183080 |
| O | -3.339161 | -1.581999 | -1.722221 | C | 6.577268  | 0.021267  | 2.508154  |
| C | 2.442245  | -3.633378 | -3.708460 | H | 6.434943  | -0.004206 | 3.593336  |
| H | 3.068660  | -3.021127 | -4.371177 | H | 7.176148  | -0.854818 | 2.227718  |
| H | 3.002702  | -4.545317 | -3.477200 | H | 7.174274  | 0.908895  | 2.265262  |

|   |          |           |           |   |          |          |           |
|---|----------|-----------|-----------|---|----------|----------|-----------|
| H | 1.549103 | -3.914941 | -4.277666 | H | 2.737174 | 2.055130 | -1.907663 |
|---|----------|-----------|-----------|---|----------|----------|-----------|

**HT-5-S<sub>1,min</sub>**

|   |           |           |           |
|---|-----------|-----------|-----------|
| O | -3.196349 | 1.610446  | 0.154241  |
| C | -3.572884 | 0.543339  | 1.058531  |
| H | -2.721233 | 0.334558  | 1.713097  |
| H | -4.410976 | 0.877569  | 1.677547  |
| O | -2.994024 | -1.118880 | -0.680137 |
| C | -4.180787 | -1.883504 | 1.233442  |
| C | -2.815796 | -2.579305 | 1.162553  |
| H | -4.429280 | -1.553566 | 2.249710  |
| H | -2.861183 | -3.636489 | 1.431534  |
| H | -2.101954 | -2.087823 | 1.833261  |
| O | -5.243356 | -2.688400 | 0.709549  |
| H | -5.286640 | -3.514619 | 1.218877  |
| N | -0.957534 | -2.305590 | -0.586104 |
| C | -0.215454 | -3.476409 | -0.420755 |
| O | -0.744366 | -4.544054 | -0.034873 |
| N | 1.100359  | -3.357259 | -0.734262 |
| H | 1.631882  | -4.217590 | -0.665213 |
| C | -3.990920 | -0.697207 | 0.272962  |
| H | -4.909626 | -0.496398 | -0.286657 |
| C | -0.304713 | -1.067705 | -0.763307 |
| H | -1.032946 | -0.344915 | -1.122466 |
| O | 0.333111  | -0.510300 | 0.464897  |
| C | -2.406745 | -2.368780 | -0.302028 |
| H | -2.818020 | -3.162488 | -0.933240 |
| C | 1.757242  | -2.306316 | -1.461005 |
| O | 3.005374  | -2.466368 | -1.744819 |
| C | 1.033637  | -0.996085 | -1.523293 |
| C | 0.980708  | -0.446717 | -2.949444 |
| H | 1.988874  | -0.358601 | -3.367869 |
| H | 0.420606  | -1.145117 | -3.582349 |
| H | 0.491364  | 0.530774  | -3.004609 |
| C | 1.393283  | 0.060404  | -0.326609 |
| C | 1.080464  | 1.539113  | -0.626347 |
| C | -0.152148 | 2.042255  | -0.176877 |
| C | 1.895506  | 2.365638  | -1.425303 |
| C | -0.659802 | 3.266610  | -0.609193 |

**HT-5-T<sub>1,min</sub>**

|   |           |           |           |
|---|-----------|-----------|-----------|
| O | 3.420744  | 1.193036  | -0.196807 |
| C | 3.748169  | 0.100281  | -1.083118 |
| H | 2.924524  | -0.020664 | -1.793624 |
| H | 4.656291  | 0.339917  | -1.644368 |
| O | 2.925879  | -1.389452 | 0.704148  |
| C | 3.973198  | -2.404159 | -1.172537 |
| C | 2.504406  | -2.847336 | -1.103626 |
| H | 4.289794  | -2.164625 | -2.194708 |
| H | 2.369957  | -3.906377 | -1.336424 |
| H | 1.894250  | -2.262485 | -1.800727 |
| O | 4.864359  | -3.360987 | -0.592049 |
| H | 4.872534  | -4.157019 | -1.148965 |
| N | 0.709070  | -2.173224 | 0.592596  |
| C | -0.161146 | -3.209367 | 0.792605  |
| O | 0.137048  | -4.394500 | 0.653597  |
| N | -1.450067 | -2.849379 | 1.205364  |
| H | -2.058440 | -3.641496 | 1.394633  |
| C | 3.975905  | -1.165990 | -0.261620 |
| H | 4.912545  | -1.090597 | 0.297888  |
| C | 0.247266  | -0.820973 | 0.575385  |
| H | 1.105811  | -0.175212 | 0.751652  |
| O | -0.428869 | -0.433857 | -0.654726 |
| C | 2.129815  | -2.515105 | 0.346575  |
| H | 2.358969  | -3.350597 | 1.012611  |
| C | -1.869328 | -1.629039 | 1.711867  |
| O | -2.915279 | -1.551486 | 2.346914  |
| C | -0.969947 | -0.441166 | 1.434760  |
| C | -0.706051 | 0.328820  | 2.725241  |
| H | -1.642578 | 0.652668  | 3.186062  |
| H | -0.180075 | -0.313891 | 3.441272  |
| H | -0.083678 | 1.206158  | 2.537153  |
| C | -1.414920 | 0.356620  | 0.079184  |
| C | -1.031685 | 1.822164  | 0.023078  |
| C | 0.355826  | 2.177610  | -0.358507 |
| C | -1.792041 | 2.875883  | 0.751128  |
| C | 1.057132  | 3.060369  | 0.398673  |

|   |           |           |           |   |           |           |           |
|---|-----------|-----------|-----------|---|-----------|-----------|-----------|
| H | -0.732975 | 1.400421  | 0.468957  | H | 0.803979  | 1.657129  | -1.197982 |
| C | 1.428223  | 3.622431  | -1.812422 | C | -1.087925 | 3.774159  | 1.492117  |
| C | 0.154831  | 4.064430  | -1.436069 | C | 0.352008  | 3.790155  | 1.449612  |
| H | 2.049443  | 4.253922  | -2.441497 | H | -1.603214 | 4.524842  | 2.087997  |
| H | -0.199308 | 5.025400  | -1.796894 | H | 0.902664  | 4.461853  | 2.100538  |
| C | -2.709956 | 2.725794  | 0.743409  | C | 3.150147  | 2.374032  | -0.793258 |
| O | -2.728809 | 2.896809  | 1.948834  | O | 3.338627  | 2.574529  | -1.979611 |
| C | -2.093353 | 3.698659  | -0.259766 | C | 2.538324  | 3.375625  | 0.177904  |
| H | -2.685021 | 3.623349  | -1.181842 | H | 3.041171  | 3.236060  | 1.144711  |
| C | -2.182749 | 5.139745  | 0.272319  | C | 2.770007  | 4.821274  | -0.298641 |
| H | -1.603932 | 5.253971  | 1.193464  | H | 2.298016  | 4.990275  | -1.270921 |
| H | -1.802115 | 5.848121  | -0.468240 | H | 2.347932  | 5.530224  | 0.419754  |
| H | -3.224079 | 5.404124  | 0.483364  | H | 3.841300  | 5.029110  | -0.391414 |
| C | 2.708783  | 0.032039  | 0.385790  | C | -2.815645 | 0.156411  | -0.481154 |
| C | 2.721265  | 0.076971  | 1.814474  | C | -2.972697 | -0.314671 | -1.791741 |
| C | 3.953245  | 0.013547  | -0.317047 | C | -3.966289 | 0.485294  | 0.252412  |
| C | 3.910769  | 0.047057  | 2.500899  | C | -4.246239 | -0.455581 | -2.350860 |
| H | 1.776142  | 0.107852  | 2.343631  | H | -2.096301 | -0.576955 | -2.375684 |
| C | 5.138865  | -0.007457 | 0.376746  | C | -5.233813 | 0.339779  | -0.311312 |
| H | 3.953257  | -0.038672 | -1.397144 | H | -3.881623 | 0.833991  | 1.276746  |
| C | 5.153462  | 0.007349  | 1.801801  | C | -5.400081 | -0.131926 | -1.624163 |
| H | 3.917546  | 0.059110  | 3.585936  | H | -4.339824 | -0.823452 | -3.370420 |
| H | 6.082296  | -0.045266 | -0.158590 | H | -6.109513 | 0.594544  | 0.282232  |
| C | 6.445227  | -0.036157 | 2.540888  | C | -6.779262 | -0.300829 | -2.218535 |
| H | 6.333467  | 0.261127  | 3.586005  | H | -6.729610 | -0.477369 | -3.297875 |
| H | 6.834908  | -1.066474 | 2.523081  | H | -7.303002 | -1.153066 | -1.765623 |
| H | 7.203012  | 0.587761  | 2.054516  | H | -7.400101 | 0.586251  | -2.045852 |
| H | 2.862842  | 2.027456  | -1.781445 | H | -2.875682 | 2.916736  | 0.695082  |

### HH-6-S<sub>0</sub>

|   |          |           |           |
|---|----------|-----------|-----------|
| C | 3.582232 | 3.873516  | 0.268263  |
| H | 3.687554 | 4.408506  | 1.217389  |
| H | 4.382592 | 4.199656  | -0.403791 |
| H | 2.622369 | 4.150956  | -0.179102 |
| O | 3.746469 | 0.251947  | -0.578999 |
| C | 3.441076 | -0.664891 | -1.655236 |
| H | 2.806862 | -0.163484 | -2.389116 |
| H | 4.379630 | -0.964921 | -2.131828 |
| O | 1.519485 | -1.461076 | -0.436903 |

### HH-6-S<sub>1,min</sub>

|   |          |           |           |
|---|----------|-----------|-----------|
| C | 3.790793 | 3.604873  | 0.413885  |
| H | 3.923266 | 4.102589  | 1.378287  |
| H | 4.599949 | 3.917134  | -0.251610 |
| H | 2.843038 | 3.938326  | -0.018157 |
| O | 3.696923 | 0.028199  | -0.541891 |
| C | 3.313886 | -0.814939 | -1.638376 |
| H | 2.698759 | -0.245766 | -2.337857 |
| H | 4.216661 | -1.159746 | -2.150122 |
| O | 1.352377 | -1.529486 | -0.449921 |

|   |           |           |           |   |           |           |           |
|---|-----------|-----------|-----------|---|-----------|-----------|-----------|
| C | 2.364123  | -2.956799 | -2.098429 | C | 2.119230  | -3.014589 | -2.139580 |
| C | 0.830983  | -3.069019 | -1.959204 | C | 0.591465  | -3.052708 | -2.006058 |
| H | 2.646093  | -2.663628 | -3.116551 | H | 2.422184  | -2.707603 | -3.146445 |
| H | 0.476324  | -4.086634 | -2.129141 | H | 0.187690  | -4.044963 | -2.201428 |
| H | 0.338619  | -2.402665 | -2.670347 | H | 0.130639  | -2.345413 | -2.698193 |
| O | 3.058345  | -4.156182 | -1.737284 | O | 2.742825  | -4.252992 | -1.812199 |
| H | 2.926002  | -4.813909 | -2.439699 | H | 2.577780  | -4.886867 | -2.526790 |
| N | -0.701397 | -2.067529 | -0.112900 | N | -0.893834 | -2.010436 | -0.172798 |
| C | -1.863565 | -2.462662 | -0.720990 | C | -2.063317 | -2.457799 | -0.736944 |
| O | -1.946079 | -3.066030 | -1.786509 | O | -2.126747 | -3.145684 | -1.755848 |
| N | -3.057995 | -2.133081 | -0.048092 | N | -3.230553 | -2.112570 | -0.097443 |
| H | -3.895505 | -2.355174 | -0.580059 | H | -4.069871 | -2.383312 | -0.595415 |
| C | 2.749693  | -1.876021 | -1.055599 | C | 2.554577  | -1.992258 | -1.071272 |
| H | 3.395204  | -2.340255 | -0.298128 | H | 3.170168  | -2.511683 | -0.326472 |
| C | -0.709523 | -1.379763 | 1.168121  | C | -0.874958 | -1.345649 | 1.111767  |
| H | 0.169843  | -1.704028 | 1.724892  | H | -0.072343 | -1.781097 | 1.710532  |
| O | -1.836702 | -0.062350 | 2.393566  | O | -1.832826 | 0.047776  | 2.362604  |
| C | 3.656607  | 2.358269  | 0.518473  | C | 3.796829  | 2.088108  | 0.611717  |
| H | 4.633723  | 2.122927  | 0.961182  | H | 4.761006  | 1.789514  | 1.041044  |
| C | 2.583427  | 1.871645  | 1.492826  | C | 2.703324  | 1.617297  | 1.559767  |
| C | 1.349335  | 1.410602  | 1.022754  | C | 1.447322  | 1.271385  | 1.066503  |
| C | 2.820553  | 1.873867  | 2.873925  | C | 2.941002  | 1.512975  | 2.929637  |
| C | 0.381625  | 0.882878  | 1.885895  | C | 0.452284  | 0.758637  | 1.894494  |
| H | 1.156163  | 1.418039  | -0.043462 | H | 1.254115  | 1.359924  | 0.004097  |
| C | 1.839916  | 1.407609  | 3.752950  | C | 1.937709  | 1.053009  | 3.777602  |
| H | 3.772215  | 2.230566  | 3.261721  | H | 3.913538  | 1.781573  | 3.334008  |
| C | 0.633915  | 0.894299  | 3.265314  | C | 0.704800  | 0.658782  | 3.264527  |
| H | 2.025004  | 1.418874  | 4.824081  | H | 2.124102  | 0.978722  | 4.844914  |
| H | -0.106092 | 0.497932  | 3.951778  | H | -0.060805 | 0.271964  | 3.927033  |
| C | -0.860170 | 0.197690  | 1.324333  | C | -0.842168 | 0.220879  | 1.304916  |
| C | -1.519363 | 0.951457  | 0.176321  | C | -1.405061 | 1.065994  | 0.178369  |
| C | -2.598781 | 1.802097  | 0.442331  | C | -2.366498 | 2.033369  | 0.460194  |
| C | -1.059735 | 0.865024  | -1.150193 | C | -0.956164 | 0.945563  | -1.141960 |
| C | -3.212511 | 2.548753  | -0.568762 | C | -2.879003 | 2.865043  | -0.533147 |
| H | -2.978683 | 1.881226  | 1.455934  | H | -2.736748 | 2.136754  | 1.474578  |
| C | -1.662283 | 1.599490  | -2.167885 | C | -1.459896 | 1.763211  | -2.142509 |
| H | -0.225518 | 0.217903  | -1.398219 | H | -0.205062 | 0.206329  | -1.395217 |
| C | -2.743964 | 2.447551  | -1.885458 | C | -2.424903 | 2.728578  | -1.845253 |
| H | -4.046926 | 3.193387  | -0.316876 | H | -3.628163 | 3.602284  | -0.271465 |
| H | -1.304386 | 1.523554  | -3.190859 | H | -1.112904 | 1.664587  | -3.166405 |
| C | 0.614707  | -2.566196 | -0.531380 | C | 0.393142  | -2.574378 | -0.573112 |

|   |           |           |           |   |           |           |           |
|---|-----------|-----------|-----------|---|-----------|-----------|-----------|
| H | 0.921322  | -3.334408 | 0.196567  | H | 0.651986  | -3.373195 | 0.139992  |
| C | -3.245691 | -1.676737 | 1.234639  | C | -3.373500 | -1.275410 | 1.020680  |
| O | -4.364171 | -1.476024 | 1.689644  | O | -4.544818 | -1.292262 | 1.587253  |
| C | -1.965682 | -1.466020 | 2.047551  | C | -2.155298 | -1.285017 | 1.964362  |
| C | -1.949596 | -2.378675 | 3.261994  | C | -2.324888 | -2.225340 | 3.138414  |
| H | -1.046494 | -2.196775 | 3.851672  | H | -1.404914 | -2.258885 | 3.727647  |
| H | -2.829632 | -2.193047 | 3.885408  | H | -3.143654 | -1.887844 | 3.778336  |
| H | -1.960653 | -3.429996 | 2.951226  | H | -2.556165 | -3.234834 | 2.785283  |
| C | 3.583778  | 1.573919  | -0.791757 | C | 3.680640  | 1.356338  | -0.716267 |
| O | 3.382964  | 2.058151  | -1.891042 | O | 3.559692  | 1.885053  | -1.801461 |
| O | -3.269646 | 3.124283  | -2.949684 | O | -2.860948 | 3.482244  | -2.891217 |
| C | -4.373830 | 4.003928  | -2.722537 | C | -3.840579 | 4.481587  | -2.643281 |
| H | -4.619326 | 4.426128  | -3.697702 | H | -4.035670 | 4.953462  | -3.605720 |
| H | -5.239314 | 3.457098  | -2.330348 | H | -4.765815 | 4.039603  | -2.258627 |
| H | -4.100231 | 4.809821  | -2.031543 | H | -3.468500 | 5.231434  | -1.937161 |

#### HH-6- $T_{1,min}$

|   |           |           |           |
|---|-----------|-----------|-----------|
| C | 3.005775  | 4.032205  | 1.110239  |
| H | 3.085259  | 4.329639  | 2.160726  |
| H | 3.716910  | 4.627328  | 0.527400  |
| H | 1.998092  | 4.270459  | 0.758446  |
| O | 3.749589  | 0.821562  | -0.599074 |
| C | 3.473729  | 0.056886  | -1.794467 |
| H | 2.782999  | 0.611219  | -2.432615 |
| H | 4.421421  | -0.090970 | -2.320450 |
| O | 1.642884  | -1.073023 | -0.702843 |
| C | 2.605668  | -2.240959 | -2.556606 |
| C | 1.089371  | -2.497475 | -2.448113 |
| H | 2.859348  | -1.788131 | -3.522221 |
| H | 0.815573  | -3.503805 | -2.770691 |
| H | 0.544093  | -1.773535 | -3.054880 |
| O | 3.401313  | -3.415039 | -2.356039 |
| H | 3.327403  | -3.976734 | -3.145054 |
| N | -0.509733 | -1.952867 | -0.468797 |
| C | -1.639923 | -2.230326 | -1.194639 |
| O | -1.679333 | -2.510814 | -2.388999 |
| N | -2.854691 | -2.195309 | -0.482348 |
| H | -3.670794 | -2.340485 | -1.071041 |
| C | 2.898866  | -1.283799 | -1.373153 |

#### HT-6- $S_0$

|   |           |           |           |
|---|-----------|-----------|-----------|
| O | 3.445930  | 1.592930  | -0.298128 |
| C | 3.777659  | 0.521296  | -1.212822 |
| H | 2.901488  | 0.313953  | -1.834721 |
| H | 4.595759  | 0.844604  | -1.863747 |
| O | 3.234344  | -1.118084 | 0.554611  |
| C | 4.386842  | -1.918356 | -1.365365 |
| C | 3.022542  | -2.614415 | -1.257293 |
| H | 4.617010  | -1.613519 | -2.392994 |
| H | 3.070844  | -3.678010 | -1.500515 |
| H | 2.297021  | -2.140965 | -1.927847 |
| O | 5.453035  | -2.713779 | -0.838087 |
| H | 5.578450  | -3.485939 | -1.414170 |
| N | 1.180775  | -2.273738 | 0.484309  |
| C | 0.461724  | -3.434564 | 0.492415  |
| O | 0.928105  | -4.534304 | 0.202189  |
| N | -0.882117 | -3.318009 | 0.879764  |
| H | -1.386341 | -4.200692 | 0.888474  |
| C | 4.214711  | -0.711547 | -0.427850 |
| H | 5.142214  | -0.504109 | 0.113497  |
| C | 0.541500  | -1.019992 | 0.700549  |
| H | 1.299777  | -0.314903 | 1.032677  |
| O | -0.162175 | -0.490942 | -0.461745 |

|   |           |           |           |   |           |           |           |
|---|-----------|-----------|-----------|---|-----------|-----------|-----------|
| H | 3.593210  | -1.786463 | -0.686708 | C | 2.639467  | -2.363978 | 0.206530  |
| C | -0.582492 | -1.585165 | 0.933277  | H | 3.030689  | -3.150029 | 0.858820  |
| H | 0.323671  | -1.944471 | 1.422022  | C | -1.519378 | -2.250350 | 1.488064  |
| O | -1.856575 | -0.672533 | 2.378981  | O | -2.630549 | -2.393266 | 1.981196  |
| C | 3.315815  | 2.536771  | 0.972690  | C | -0.736987 | -0.944699 | 1.549043  |
| H | 4.341641  | 2.352341  | 1.312408  | C | -0.598448 | -0.507965 | 3.006855  |
| C | 2.385956  | 1.620341  | 1.766993  | H | -1.579252 | -0.342959 | 3.461487  |
| C | 1.039007  | 1.649532  | 1.598376  | H | -0.086742 | -1.287511 | 3.583467  |
| C | 2.981120  | 0.634798  | 2.683942  | H | -0.014392 | 0.411605  | 3.084246  |
| C | 0.199168  | 0.605997  | 2.204794  | C | -1.185972 | 0.097657  | 0.404105  |
| H | 0.581720  | 2.371533  | 0.928779  | C | -0.773630 | 1.540133  | 0.760828  |
| C | 2.142474  | -0.141931 | 3.537358  | C | 0.437945  | 2.025057  | 0.254732  |
| H | 4.059831  | 0.603649  | 2.799764  | C | -1.507234 | 2.358382  | 1.628968  |
| C | 0.785352  | -0.105718 | 3.391169  | C | 0.984248  | 3.251928  | 0.645167  |
| H | 2.593788  | -0.704782 | 4.352274  | H | 0.967118  | 1.393418  | -0.444217 |
| H | 0.123860  | -0.585243 | 4.105321  | C | -0.995657 | 3.604659  | 2.003806  |
| C | -0.884067 | -0.079351 | 1.429149  | C | 0.247368  | 4.044193  | 1.537634  |
| C | -1.585016 | 0.821601  | 0.423294  | H | -1.563249 | 4.231900  | 2.686276  |
| C | -2.814603 | 1.407089  | 0.741328  | H | 0.635209  | 4.999363  | 1.880322  |
| C | -1.007425 | 1.124816  | -0.822508 | C | 2.925442  | 2.705577  | -0.865370 |
| C | -3.468888 | 2.266323  | -0.149324 | O | 2.871734  | 2.864267  | -2.071312 |
| H | -3.280300 | 1.184802  | 1.696079  | C | 2.379750  | 3.689216  | 0.167095  |
| C | -1.647404 | 1.974710  | -1.719489 | H | 3.049756  | 3.639691  | 1.035854  |
| H | -0.048105 | 0.695974  | -1.093299 | C | 2.406456  | 5.120020  | -0.398233 |
| C | -2.884833 | 2.551330  | -1.390134 | H | 1.739796  | 5.213231  | -1.260615 |
| H | -4.422194 | 2.696590  | 0.135645  | H | 2.091072  | 5.838089  | 0.363519  |
| H | -1.199200 | 2.203040  | -2.682524 | H | 3.419700  | 5.389443  | -0.714121 |
| C | 0.841870  | -2.232771 | -0.962540 | H | -2.460772 | 2.034072  | 2.033013  |
| H | 1.234413  | -3.066988 | -0.359719 | C | -2.557929 | 0.015266  | -0.235708 |
| C | -3.077556 | -2.132358 | 0.872063  | C | -3.740106 | 0.101021  | 0.507142  |
| O | -4.207963 | -2.197003 | 1.339418  | C | -2.660155 | -0.085284 | -1.633674 |
| C | -1.827798 | -1.977808 | 1.739617  | C | -4.994481 | 0.093379  | -0.112794 |
| C | -1.720907 | -3.118007 | 2.737873  | H | -3.706775 | 0.148443  | 1.590558  |
| H | -0.837010 | -2.981328 | 3.367306  | C | -3.900430 | -0.093506 | -2.264914 |
| H | -2.611483 | -3.148267 | 3.373105  | H | -1.758973 | -0.161240 | -2.233596 |
| H | -1.635593 | -4.078037 | 2.215472  | C | -5.078641 | -0.000654 | -1.508120 |
| C | 3.237010  | 2.065043  | -0.480040 | H | -5.885390 | 0.152714  | 0.501817  |
| O | 2.741387  | 2.688285  | -1.400594 | H | -3.972317 | -0.172349 | -3.346060 |
| O | -3.434661 | 3.369792  | -2.336367 | O | -6.248707 | -0.016445 | -2.214630 |
| C | -4.690261 | 3.993102  | -2.054963 | C | -7.481945 | 0.073422  | -1.497152 |
| H | -4.926801 | 4.590110  | -2.936517 | H | -8.266102 | 0.047376  | -2.254755 |

H -5.475474 3.244530 -1.896727  
H -4.618479 4.646185 -1.177289

H -7.603546 -0.775147 -0.813641  
H -7.544379 1.013306 -0.936119

**HT-6-S<sub>1,min</sub>**

O 3.612457 1.253859 -0.235229  
C 3.818101 0.149624 -1.149442  
H 2.923808 0.054191 -1.772834  
H 4.669350 0.374253 -1.799092  
O 3.109761 -1.420738 0.629634  
C 4.069198 -2.337438 -1.343367  
C 2.625213 -2.833313 -1.193968  
H 4.305821 -2.043398 -2.373343  
H 2.506156 -3.884212 -1.465435  
H 1.950949 -2.239011 -1.820989  
O 5.032778 -3.287495 -0.874033  
H 4.959604 -4.094194 -1.410705  
N 0.930395 -2.319345 0.664307  
C 0.036081 -3.382895 0.594776  
O 0.381657 -4.519344 0.205939  
N -1.229310 -3.080188 1.000978  
H -1.868416 -3.866993 1.019234  
C 4.101177 -1.138949 -0.379424  
H 5.068456 -1.070019 0.127534  
C 0.449941 -0.994739 0.806062  
H 1.285570 -0.364097 1.098857  
O -0.156955 -0.431496 -0.422978  
C 2.336583 -2.578054 0.291727  
H 2.671751 -3.423771 0.899573  
C -1.660490 -1.936251 1.750033  
O -2.806003 -1.998010 2.326782  
C -0.809536 -0.726258 1.644752  
C -0.612630 -0.040332 2.993548  
H -1.579575 0.200589 3.446638  
H -0.087042 -0.718075 3.677524  
H -0.028284 0.879991 2.906064  
C -1.129436 0.319799 0.336455  
C -0.665312 1.755933 0.518533  
C 0.661317 2.056886 0.162787  
C -1.424464 2.764724 1.141301

**HT-6-T<sub>1,min</sub>**

O 3.632995 1.211106 -0.279930  
C 3.934125 0.121838 -1.179873  
H 3.086061 -0.001561 -1.860549  
H 4.819929 0.368053 -1.773023  
O 3.185976 -1.378104 0.631712  
C 4.170581 -2.380951 -1.284836  
C 2.708022 -2.833430 -1.163977  
H 4.448216 -2.136513 -2.317146  
H 2.571438 -3.892563 -1.395172  
H 2.069687 -2.250377 -1.836893  
O 5.088068 -3.333911 -0.740121  
H 5.076763 -4.130406 -1.296361  
N 0.971376 -2.175213 0.598416  
C 0.114779 -3.217062 0.825463  
O 0.414281 -4.399931 0.670612  
N -1.160748 -2.866106 1.285170  
H -1.757877 -3.662359 1.491944  
C 4.198824 -1.145360 -0.370823  
H 5.154689 -1.065883 0.154552  
C 0.501568 -0.825630 0.603208  
H 1.362103 -0.175585 0.751947  
O -0.219397 -0.437824 -0.600796  
C 2.384243 -2.507610 0.299856  
H 2.642530 -3.343509 0.954641  
C -1.569097 -1.649957 1.810097  
O -2.592947 -1.580801 2.481485  
C -0.686939 -0.456161 1.506142  
C -0.380711 0.310918 2.789159  
H -1.301520 0.629569 3.284057  
H 0.173355 -0.331455 3.484059  
H 0.230459 1.191721 2.581574  
C -1.183690 0.343979 0.171432  
C -0.811047 1.812545 0.107702  
C 0.558443 2.178593 -0.324844  
C -1.549283 2.855432 0.871830

|   |           |           |           |   |           |           |           |
|---|-----------|-----------|-----------|---|-----------|-----------|-----------|
| C | 1.282049  | 3.264182  | 0.486170  | C | 1.282476  | 3.065340  | 0.406485  |
| H | 1.212545  | 1.286264  | -0.353223 | H | 0.978457  | 1.661996  | -1.181062 |
| C | -0.832474 | 3.996391  | 1.430210  | C | -0.823808 | 3.759954  | 1.583997  |
| C | 0.513915  | 4.247857  | 1.133239  | C | 0.613293  | 3.790105  | 1.483042  |
| H | -1.422942 | 4.769277  | 1.916183  | H | -1.321328 | 4.503539  | 2.203420  |
| H | 0.947608  | 5.203754  | 1.409584  | H | 1.182945  | 4.466878  | 2.111991  |
| C | 3.263161  | 2.427572  | -0.812496 | C | 3.332970  | 2.391019  | -0.864411 |
| O | 3.291988  | 2.600852  | -2.017783 | O | 3.475131  | 2.593356  | -2.056943 |
| C | 2.783604  | 3.464715  | 0.200851  | C | 2.752710  | 3.388832  | 0.129779  |
| H | 3.321729  | 3.269196  | 1.138072  | H | 3.292887  | 3.251918  | 1.076639  |
| C | 3.141139  | 4.879096  | -0.286243 | C | 2.958325  | 4.835778  | -0.354755 |
| H | 2.608002  | 5.124498  | -1.209564 | H | 2.449219  | 5.002198  | -1.308590 |
| H | 2.885847  | 5.624324  | 0.471739  | H | 2.559541  | 5.542233  | 0.379228  |
| H | 4.216651  | 4.956080  | -0.477643 | H | 4.024160  | 5.049746  | -0.487827 |
| H | -2.458210 | 2.596057  | 1.428667  | H | -2.634903 | 2.882431  | 0.865665  |
| C | -2.488369 | 0.222972  | -0.283293 | C | -2.598987 | 0.141601  | -0.346537 |
| C | -3.673470 | 0.327876  | 0.504624  | C | -3.728836 | 0.440599  | 0.423595  |
| C | -2.606366 | 0.045311  | -1.692064 | C | -2.793478 | -0.301629 | -1.667089 |
| C | -4.919589 | 0.270463  | -0.070416 | C | -5.021084 | 0.298305  | -0.091836 |
| H | -3.587249 | 0.417714  | 1.579037  | H | -3.619215 | 0.766906  | 1.452737  |
| C | -3.837866 | -0.019422 | -2.286517 | C | -4.072319 | -0.446007 | -2.194163 |
| H | -1.704850 | -0.044534 | -2.286065 | H | -1.933242 | -0.542647 | -2.283045 |
| C | -5.019379 | 0.093547  | -1.481343 | C | -5.197673 | -0.145133 | -1.409984 |
| H | -5.809074 | 0.344638  | 0.541715  | H | -5.869497 | 0.529047  | 0.542117  |
| H | -3.957498 | -0.151422 | -3.355892 | H | -4.217205 | -0.792924 | -3.213394 |
| O | -6.152835 | 0.017430  | -2.143732 | O | -6.410790 | -0.316888 | -2.012293 |
| C | -7.436714 | 0.113327  | -1.472280 | C | -7.595139 | -0.027239 | -1.264641 |
| H | -8.171585 | 0.020221  | -2.268415 | H | -8.426644 | -0.231057 | -1.940195 |
| H | -7.538993 | -0.705039 | -0.757286 | H | -7.671639 | -0.673118 | -0.382259 |
| H | -7.522805 | 1.084233  | -0.981042 | H | -7.619911 | 1.024923  | -0.958074 |

### HH-7-S<sub>0</sub>

|   |          |           |           |
|---|----------|-----------|-----------|
| C | 3.436282 | 3.955411  | 0.807200  |
| H | 3.589921 | 4.318273  | 1.828352  |
| H | 4.165901 | 4.443338  | 0.152947  |
| H | 2.432558 | 4.249649  | 0.484137  |
| O | 3.728706 | 0.563947  | -0.698529 |
| C | 3.392200 | -0.168480 | -1.899835 |
| H | 2.675799 | 0.408235  | -2.488280 |

### HH-7-S<sub>1,min</sub>

|   |          |           |           |
|---|----------|-----------|-----------|
| C | 3.707983 | 3.871397  | 0.712644  |
| H | 3.901211 | 4.218307  | 1.732395  |
| H | 4.495467 | 4.263597  | 0.062264  |
| H | 2.748335 | 4.279640  | 0.382483  |
| O | 3.738630 | 0.482720  | -0.802160 |
| C | 3.344281 | -0.250763 | -1.985095 |
| H | 2.595804 | 0.322513  | -2.535723 |



|   |           |           |           |   |           |           |           |
|---|-----------|-----------|-----------|---|-----------|-----------|-----------|
| H | 4.306386  | -0.314601 | -2.483583 | H | 4.228346  | -0.391861 | -2.614093 |
| O | 1.615947  | -1.302071 | -0.726136 | O | 1.660311  | -1.396806 | -0.682884 |
| C | 2.424712  | -2.422269 | -2.674818 | C | 2.318080  | -2.483806 | -2.714016 |
| C | 0.921568  | -2.694265 | -2.445919 | C | 0.811551  | -2.667732 | -2.433883 |
| H | 2.590971  | -1.929801 | -3.639941 | H | 2.477871  | -2.000227 | -3.684201 |
| H | 0.634307  | -3.699289 | -2.758716 | H | 0.448375  | -3.640495 | -2.766621 |
| H | 0.319412  | -1.969336 | -2.997297 | H | 0.236860  | -1.886108 | -2.934431 |
| O | 3.237247  | -3.597749 | -2.591542 | O | 3.059185  | -3.704899 | -2.653500 |
| H | 3.102321  | -4.124992 | -3.395915 | H | 2.869012  | -4.224642 | -3.451780 |
| N | -0.516634 | -2.141923 | -0.348934 | N | -0.503736 | -2.127154 | -0.239559 |
| C | -1.698212 | -2.525468 | -0.929950 | C | -1.743933 | -2.460144 | -0.796397 |
| O | -1.829095 | -2.950263 | -2.072571 | O | -1.893386 | -2.829840 | -1.947139 |
| N | -2.850525 | -2.400610 | -0.126448 | N | -2.844163 | -2.368561 | 0.056640  |
| H | -3.713344 | -2.601043 | -0.625971 | H | -3.733071 | -2.564331 | -0.398501 |
| C | 2.820641  | -1.511467 | -1.483940 | C | 2.806578  | -1.598672 | -1.540339 |
| H | 3.546724  | -2.052092 | -0.862283 | H | 3.572041  | -2.147371 | -0.978746 |
| C | -0.461188 | -1.685361 | 1.029036  | C | -0.383001 | -1.676336 | 1.089587  |
| H | 0.483687  | -2.023021 | 1.454636  | H | 0.592032  | -1.948524 | 1.483992  |
| O | -1.579393 | -0.678271 | 2.530283  | O | -1.505258 | -0.575162 | 2.595147  |
| C | 3.601527  | 2.427093  | 0.771043  | C | 3.695949  | 2.333581  | 0.669067  |
| H | 4.618960  | 2.175502  | 1.098685  | H | 4.674441  | 1.959183  | 0.997461  |
| C | 2.629165  | 1.711957  | 1.710018  | C | 2.655421  | 1.738723  | 1.612618  |
| C | 1.401884  | 1.234459  | 1.239460  | C | 1.458117  | 1.212947  | 1.164225  |
| C | 2.952799  | 1.520304  | 3.059893  | C | 2.916605  | 1.715425  | 3.007257  |
| C | 0.528763  | 0.511077  | 2.060343  | C | 0.537318  | 0.601091  | 2.056555  |
| H | 1.144715  | 1.389528  | 0.198827  | H | 1.214089  | 1.237885  | 0.111664  |
| C | 2.064010  | 0.852262  | 3.905482  | C | 2.003026  | 1.145849  | 3.914771  |
| H | 3.900974  | 1.884935  | 3.448534  | H | 3.846020  | 2.132943  | 3.382992  |
| C | 0.864923  | 0.331132  | 3.409458  | C | 0.839159  | 0.565136  | 3.450810  |
| H | 2.316379  | 0.713334  | 4.953500  | H | 2.228497  | 1.149695  | 4.975727  |
| H | 0.197553  | -0.218344 | 4.063847  | H | 0.140190  | 0.097201  | 4.131939  |
| C | -0.701529 | -0.173679 | 1.471401  | C | -0.687205 | -0.044328 | 1.533767  |
| C | -1.486190 | 0.717925  | 0.516252  | C | -1.495166 | 0.746517  | 0.515182  |
| C | -2.601148 | 1.419316  | 1.004746  | C | -2.613125 | 1.467616  | 0.975428  |
| C | -1.110696 | 0.884560  | -0.827358 | C | -1.144547 | 0.849295  | -0.840067 |
| C | -3.327660 | 2.272137  | 0.179420  | C | -3.362247 | 2.257398  | 0.111724  |
| H | -2.904946 | 1.289335  | 2.037292  | H | -2.904468 | 1.399551  | 2.018782  |
| C | -1.830767 | 1.730300  | -1.668449 | C | -1.885086 | 1.635385  | -1.718113 |
| H | -0.256517 | 0.351446  | -1.227808 | H | -0.284337 | 0.314686  | -1.229630 |
| C | -2.931708 | 2.414468  | -1.152345 | C | -3.006006 | 2.351190  | -1.250395 |
| H | -4.185701 | 2.814993  | 0.556669  | H | -4.226676 | 2.801232  | 0.472087  |

|   |           |           |           |   |           |           |           |
|---|-----------|-----------|-----------|---|-----------|-----------|-----------|
| H | -1.545154 | 1.855516  | -2.705738 | H | -1.609185 | 1.703569  | -2.762855 |
| C | 0.791245  | -2.452177 | -0.941664 | C | 0.767380  | -2.481202 | -0.917643 |
| H | 1.214530  | -3.299018 | -0.378345 | H | 1.141533  | -3.383308 | -0.409526 |
| C | -2.956695 | -2.205717 | 1.230440  | C | -2.877687 | -2.180248 | 1.421208  |
| O | -4.040390 | -2.191182 | 1.797665  | O | -3.921729 | -2.202136 | 2.049450  |
| C | -1.629561 | -2.019875 | 1.969675  | C | -1.523438 | -1.933386 | 2.091298  |
| C | -1.439990 | -3.102961 | 3.016340  | C | -1.251659 | -2.956747 | 3.179634  |
| H | -0.507736 | -2.933945 | 3.562686  | H | -0.304210 | -2.734833 | 3.678426  |
| H | -2.276981 | -3.095868 | 3.721036  | H | -2.061065 | -2.927939 | 3.915202  |
| H | -1.395537 | -4.089297 | 2.540514  | H | -1.201033 | -3.963969 | 2.752138  |
| C | 3.466167  | 1.886321  | -0.652461 | C | 3.487038  | 1.805940  | -0.749387 |
| O | 3.140214  | 2.541851  | -1.625470 | O | 3.110973  | 2.466781  | -1.697384 |
| N | -3.692262 | 3.304876  | -2.031036 | N | -3.759774 | 3.144532  | -2.128825 |
| O | -4.667087 | 3.900449  | -1.559977 | O | -4.790095 | 3.786949  | -1.678215 |
| O | -3.326460 | 3.423061  | -3.205431 | O | -3.406716 | 3.223285  | -3.372296 |

#### HH-7- $T_{1,min}$

|   |           |           |           |
|---|-----------|-----------|-----------|
| C | 3.301252  | 4.032949  | 0.871413  |
| H | 3.445708  | 4.383695  | 1.898126  |
| H | 4.009941  | 4.558230  | 0.223076  |
| H | 2.286228  | 4.295904  | 0.556834  |
| O | 3.707918  | 0.679876  | -0.692939 |
| C | 3.391515  | -0.043467 | -1.905100 |
| H | 2.653601  | 0.518375  | -2.481349 |
| H | 4.307818  | -0.148857 | -2.494219 |
| O | 1.657853  | -1.253909 | -0.745910 |
| C | 2.499648  | -2.316469 | -2.713426 |
| C | 1.003168  | -2.628866 | -2.494715 |
| H | 2.658173  | -1.808195 | -3.671689 |
| H | 0.740102  | -3.633522 | -2.829223 |
| H | 0.385557  | -1.906837 | -3.032746 |
| O | 3.340688  | -3.472657 | -2.640600 |
| H | 3.217275  | -3.996641 | -3.448980 |
| N | -0.452510 | -2.157062 | -0.390152 |
| C | -1.622687 | -2.556904 | -0.982252 |
| O | -1.741005 | -2.958051 | -2.135088 |
| N | -2.779077 | -2.481591 | -0.178722 |
| H | -3.635871 | -2.691115 | -0.684733 |
| C | 2.866987  | -1.411516 | -1.509157 |

#### HT-7- $S_0$

|   |           |           |           |
|---|-----------|-----------|-----------|
| O | 3.549302  | 1.585941  | -0.433915 |
| C | 3.818604  | 0.512807  | -1.367317 |
| H | 2.903009  | 0.305336  | -1.929180 |
| H | 4.592458  | 0.833813  | -2.071206 |
| O | 3.387928  | -1.118201 | 0.436184  |
| C | 4.409990  | -1.929693 | -1.552920 |
| C | 3.057149  | -2.626238 | -1.347370 |
| H | 4.566926  | -1.628717 | -2.595401 |
| H | 3.089838  | -3.690972 | -1.587776 |
| H | 2.286520  | -2.156647 | -1.968496 |
| O | 5.511187  | -2.722225 | -1.098514 |
| H | 5.599788  | -3.494762 | -1.680951 |
| N | 1.337012  | -2.277869 | 0.511673  |
| C | 0.623115  | -3.441031 | 0.575387  |
| O | 1.074505  | -4.541704 | 0.269256  |
| N | -0.696699 | -3.324365 | 1.039578  |
| H | -1.202097 | -4.205825 | 1.075012  |
| C | 4.303503  | -0.719069 | -0.610209 |
| H | 5.265358  | -0.513422 | -0.131864 |
| C | 0.714911  | -1.024188 | 0.761755  |
| H | 1.490246  | -0.318556 | 1.050205  |
| O | -0.051975 | -0.489552 | -0.362182 |

|   |           |           |           |   |           |           |           |
|---|-----------|-----------|-----------|---|-----------|-----------|-----------|
| H | 3.612600  | -1.936418 | -0.897278 | C | -2.422018 | 0.031713  | -0.009048 |
| C | -0.411387 | -1.728283 | 0.997620  | C | -3.560878 | 0.132681  | 0.806382  |
| H | 0.541052  | -2.051049 | 1.417997  | C | -2.584101 | -0.085589 | -1.398679 |
| O | -1.552254 | -0.786612 | 2.522831  | C | -4.836425 | 0.127504  | 0.250267  |
| C | 3.521724  | 2.512533  | 0.808666  | H | -3.465731 | 0.187920  | 1.884199  |
| H | 4.548972  | 2.292484  | 1.128282  | C | -3.853170 | -0.090678 | -1.971549 |
| C | 2.579603  | 1.745773  | 1.737610  | H | -1.711464 | -0.175426 | -2.035469 |
| C | 1.362622  | 1.244785  | 1.264589  | C | -4.965880 | 0.019282  | -1.136109 |
| C | 2.921563  | 1.527333  | 3.078846  | H | -5.716048 | 0.198697  | 0.878089  |
| C | 0.519900  | 0.471441  | 2.071598  | H | -3.979372 | -0.177804 | -3.043759 |
| H | 1.090383  | 1.420860  | 0.230974  | C | 2.775162  | -2.367535 | 0.137563  |
| C | 2.061298  | 0.809090  | 3.912895  | H | 3.210290  | -3.148634 | 0.767430  |
| H | 3.861801  | 1.910200  | 3.469340  | C | -1.311315 | -2.246814 | 1.648817  |
| C | 0.874606  | 0.264457  | 3.412184  | O | -2.412038 | -2.370602 | 2.169793  |
| H | 2.327376  | 0.649448  | 4.954604  | C | -0.518421 | -0.944814 | 1.675143  |
| H | 0.230837  | -0.324030 | 4.056382  | C | -0.304183 | -0.513422 | 3.124981  |
| C | -0.692748 | -0.233419 | 1.470699  | H | -1.259323 | -0.357096 | 3.633940  |
| C | -1.507298 | 0.651908  | 0.536138  | H | 0.242472  | -1.293807 | 3.666987  |
| C | -2.638034 | 1.318419  | 1.042728  | H | 0.278919  | 0.408528  | 3.175096  |
| C | -1.146452 | 0.856117  | -0.808117 | C | -1.017221 | 0.102122  | 0.558698  |
| C | -3.393930 | 2.166532  | 0.243676  | C | -0.590985 | 1.547360  | 0.889344  |
| H | -2.930473 | 1.163055  | 2.075318  | C | 0.586180  | 2.028817  | 0.305079  |
| C | -1.888679 | 1.696073  | -1.631664 | C | -1.266296 | 2.364463  | 1.804199  |
| H | -0.279450 | 0.354986  | -1.222675 | C | 1.159658  | 3.253161  | 0.661960  |
| C | -3.009339 | 2.352969  | -1.096268 | H | 1.067997  | 1.396354  | -0.426386 |
| H | -4.263877 | 2.678133  | 0.641661  | C | -0.729462 | 3.610148  | 2.144164  |
| H | -1.608115 | 1.845313  | -2.668928 | H | -2.190228 | 2.043056  | 2.273505  |
| C | 0.863838  | -2.420542 | -0.986206 | C | 0.481831  | 4.046569  | 1.599273  |
| H | 1.308090  | -3.267342 | -0.439114 | H | -1.250791 | 4.237947  | 2.861823  |
| C | -2.893230 | -2.311416 | 1.180737  | H | 0.892784  | 5.000621  | 1.916877  |
| O | -3.979006 | -2.329902 | 1.744286  | C | 3.000711  | 2.701807  | -0.967003 |
| C | -1.572166 | -2.113260 | 1.927832  | O | 2.872951  | 2.862752  | -2.166927 |
| C | -1.360706 | -3.219366 | 2.946289  | C | 2.524477  | 3.685800  | 0.099229  |
| H | -0.432073 | -3.046001 | 3.497509  | H | 3.246209  | 3.630544  | 0.925179  |
| H | -2.197652 | -3.247303 | 3.650603  | C | 2.523090  | 5.118309  | -0.462157 |
| H | -1.296606 | -4.192155 | 2.445342  | H | 1.803678  | 5.218561  | -1.280144 |
| C | 3.399934  | 1.991355  | -0.623431 | H | 2.261265  | 5.835461  | 0.320482  |
| O | 3.048002  | 2.651546  | -1.584217 | H | 3.515868  | 5.382906  | -0.840652 |
| N | -3.777560 | 3.164074  | -1.917785 | N | -6.304212 | 0.013688  | -1.727379 |
| O | -4.736860 | 3.967835  | -1.533592 | O | -7.278840 | 0.117033  | -0.974474 |
| O | -3.458263 | 3.570807  | -3.120722 | O | -6.402949 | -0.093325 | -2.954712 |

HT-7- $S_{1,min}$ 

|   |           |           |           |
|---|-----------|-----------|-----------|
| O | 3.367870  | 1.782468  | -0.343651 |
| C | 3.813124  | 0.783214  | -1.299367 |
| H | 2.960676  | 0.512962  | -1.929377 |
| H | 4.591008  | 1.218474  | -1.932690 |
| O | 3.463316  | -0.945575 | 0.432066  |
| C | 4.626711  | -1.586254 | -1.538931 |
| C | 3.325481  | -2.394879 | -1.424350 |
| H | 4.807323  | -1.233979 | -2.561361 |
| H | 3.453950  | -3.442443 | -1.704477 |
| H | 2.547071  | -1.961701 | -2.061823 |
| O | 5.764623  | -2.304701 | -1.055868 |
| H | 5.939649  | -3.049636 | -1.654446 |
| N | 1.505571  | -2.254430 | 0.369622  |
| C | 0.875327  | -3.468906 | 0.368116  |
| O | 1.409520  | -4.516261 | 0.017041  |
| N | -0.454096 | -3.467296 | 0.819921  |
| H | -0.895726 | -4.383164 | 0.806597  |
| C | 4.376895  | -0.426189 | -0.560349 |
| H | 5.296005  | -0.152621 | -0.035018 |
| C | 0.791659  | -1.068369 | 0.672848  |
| H | 1.512769  | -0.316941 | 0.987374  |
| O | -0.026960 | -0.545093 | -0.426390 |
| C | -2.434048 | -0.144054 | -0.025235 |
| C | -3.563537 | -0.190792 | 0.810085  |
| C | -2.629196 | -0.055312 | -1.414972 |
| C | -4.849916 | -0.148892 | 0.281177  |
| H | -3.451958 | -0.291123 | 1.884965  |
| C | -3.908130 | -0.014164 | -1.959786 |
| H | -1.770111 | -0.020835 | -2.077783 |
| C | -5.035924 | -0.050923 | -1.112832 |
| H | -5.715022 | -0.193160 | 0.930757  |
| H | -4.051107 | 0.051859  | -3.031132 |
| C | 2.961298  | -2.223215 | 0.054873  |
| H | 3.427278  | -2.995433 | 0.673192  |
| C | -1.140271 | -2.475465 | 1.495525  |
| O | -2.218635 | -2.706661 | 2.022257  |
| C | -0.440205 | -1.121452 | 1.591820  |

HT-7- $T_{1,min}$ 

|   |           |           |           |
|---|-----------|-----------|-----------|
| O | 3.533049  | 1.608869  | -0.433989 |
| C | 3.817047  | 0.542433  | -1.370603 |
| H | 2.905645  | 0.326631  | -1.936199 |
| H | 4.588984  | 0.875444  | -2.071007 |
| O | 3.407467  | -1.101357 | 0.428472  |
| C | 4.432797  | -1.892608 | -1.566073 |
| C | 3.084427  | -2.598908 | -1.365707 |
| H | 4.590449  | -1.586376 | -2.606918 |
| H | 3.123640  | -3.661830 | -1.613131 |
| H | 2.310952  | -2.130188 | -1.983907 |
| O | 5.538097  | -2.679725 | -1.112027 |
| H | 5.629721  | -3.452269 | -1.694004 |
| N | 1.362010  | -2.272989 | 0.494879  |
| C | 0.656106  | -3.441007 | 0.554684  |
| O | 1.114182  | -4.537455 | 0.242520  |
| N | -0.663742 | -3.334925 | 1.021372  |
| H | -1.161663 | -4.220621 | 1.056808  |
| C | 4.315734  | -0.687096 | -0.618335 |
| H | 5.276499  | -0.473003 | -0.141538 |
| C | 0.731236  | -1.024839 | 0.753609  |
| H | 1.503034  | -0.314768 | 1.040925  |
| O | -0.045443 | -0.493164 | -0.363831 |
| C | -2.419442 | 0.001447  | 0.003956  |
| C | -3.557954 | 0.093033  | 0.824293  |
| C | -2.591521 | -0.117733 | -1.385974 |
| C | -4.836433 | 0.075013  | 0.281262  |
| H | -3.457226 | 0.151315  | 1.901744  |
| C | -3.859465 | -0.134634 | -1.955974 |
| H | -1.721407 | -0.197174 | -2.028004 |
| C | -4.979210 | -0.028691 | -1.113699 |
| H | -5.711399 | 0.135281  | 0.919676  |
| H | -3.985884 | -0.222370 | -3.029767 |
| C | 2.800652  | -2.351686 | 0.120939  |
| H | 3.239926  | -3.134716 | 0.745452  |
| C | -1.278693 | -2.267485 | 1.648939  |
| O | -2.371049 | -2.405795 | 2.183827  |
| C | -0.497002 | -0.959327 | 1.674703  |

|   |           |           |           |   |           |           |           |
|---|-----------|-----------|-----------|---|-----------|-----------|-----------|
| C | -0.254111 | -0.750885 | 3.063110  | C | -0.277765 | -0.530618 | 3.124608  |
| H | -1.215409 | -0.686560 | 3.579569  | H | -1.231333 | -0.383747 | 3.639364  |
| H | 0.342808  | -1.519689 | 3.566092  | H | 0.278419  | -1.307824 | 3.661532  |
| H | 0.276611  | 0.199374  | 3.172484  | H | 0.297780  | 0.396091  | 3.174279  |
| C | -1.020757 | -0.073018 | 0.522288  | C | -1.013079 | 0.086485  | 0.563967  |
| C | -0.665348 | 1.367915  | 0.911448  | C | -0.594535 | 1.532823  | 0.899080  |
| C | 0.389371  | 1.994793  | 0.269629  | C | 0.574874  | 2.027585  | 0.310178  |
| C | -1.353924 | 2.077309  | 1.963859  | C | -1.270606 | 2.340176  | 1.822113  |
| C | 0.910255  | 3.207226  | 0.736958  | C | 1.140257  | 3.254965  | 0.669550  |
| H | 0.858876  | 1.471777  | -0.550045 | H | 1.058314  | 1.402555  | -0.426584 |
| C | -0.886625 | 3.317777  | 2.411041  | C | -0.742423 | 3.588775  | 2.164992  |
| H | -2.238407 | 1.646547  | 2.416125  | H | -2.187505 | 2.007391  | 2.297315  |
| C | 0.235524  | 3.877610  | 1.828803  | C | 0.461597  | 4.038365  | 1.614632  |
| H | -1.401698 | 3.830180  | 3.214935  | H | -1.264403 | 4.208459  | 2.889267  |
| H | 0.622405  | 4.821555  | 2.194514  | H | 0.865820  | 4.995011  | 1.933191  |
| C | 2.820027  | 2.891231  | -0.877647 | C | 2.982861  | 2.724154  | -0.966956 |
| O | 2.800865  | 3.127007  | -2.068593 | O | 2.863500  | 2.888588  | -2.167289 |
| C | 2.187280  | 3.796242  | 0.185851  | C | 2.496391  | 3.703833  | 0.098826  |
| H | 2.892155  | 3.857125  | 1.029320  | H | 3.223272  | 3.661832  | 0.921133  |
| C | 1.968712  | 5.226348  | -0.366437 | C | 2.471829  | 5.134506  | -0.466749 |
| H | 1.261367  | 5.216516  | -1.198804 | H | 1.750528  | 5.220708  | -1.284679 |
| H | 1.592319  | 5.893219  | 0.412619  | H | 2.198514  | 5.849449  | 0.314005  |
| H | 2.923516  | 5.622861  | -0.720855 | H | 3.459987  | 5.414125  | -0.846545 |
| N | -6.333504 | 0.012747  | -1.652102 | N | -6.252726 | -0.085540 | -1.662252 |
| O | -7.351957 | -0.012729 | -0.854019 | O | -7.369519 | 0.231179  | -1.055417 |
| O | -6.482412 | 0.094832  | -2.935088 | O | -6.543480 | -0.056012 | -2.938763 |

**P-1-S<sub>0</sub>**

|   |           |          |           |
|---|-----------|----------|-----------|
| C | -3.366208 | 3.758981 | 0.424076  |
| H | -4.015881 | 3.877551 | 1.297110  |
| H | -3.216265 | 4.743368 | -0.031945 |
| H | -3.876395 | 3.120552 | -0.303192 |
| O | 0.210909  | 2.927317 | 0.087866  |
| C | 1.219453  | 2.725221 | -0.932013 |
| H | 0.960110  | 1.848257 | -1.530388 |
| H | 1.253702  | 3.608815 | -1.576939 |
| O | 2.555089  | 1.277344 | 0.455391  |
| C | 3.738079  | 2.487556 | -1.219592 |

**P-1-S<sub>1,min</sub>**

|   |           |          |           |
|---|-----------|----------|-----------|
| C | -3.580903 | 3.731744 | 0.602622  |
| H | -4.198490 | 3.841377 | 1.499991  |
| H | -3.435718 | 4.723356 | 0.159762  |
| H | -4.123951 | 3.111974 | -0.116852 |
| O | -0.027950 | 2.892954 | 0.121912  |
| C | 0.935886  | 2.690557 | -0.938500 |
| H | 0.694740  | 1.770600 | -1.477718 |
| H | 0.890614  | 3.538383 | -1.629084 |
| O | 2.423423  | 1.392506 | 0.445734  |
| C | 3.444142  | 2.566412 | -1.354070 |

|   |           |           |           |   |           |           |           |
|---|-----------|-----------|-----------|---|-----------|-----------|-----------|
| C | 4.717422  | 1.518173  | -0.534698 | C | 4.517006  | 1.704846  | -0.665762 |
| H | 3.420942  | 2.092547  | -2.188344 | H | 3.100927  | 2.088553  | -2.275590 |
| H | 5.435206  | 2.099535  | 0.052782  | H | 5.225931  | 2.365081  | -0.156301 |
| H | 5.272294  | 0.900275  | -1.242551 | H | 5.072769  | 1.075952  | -1.363214 |
| O | 4.238227  | 3.816655  | -1.371776 | O | 3.850518  | 3.909489  | -1.619428 |
| H | 4.789921  | 3.853296  | -2.169258 | H | 4.356382  | 3.924821  | -2.447365 |
| N | 3.707782  | -0.752244 | 0.107881  | N | 3.695615  | -0.576123 | 0.172755  |
| C | 3.275717  | -1.147633 | -1.153371 | C | 3.229180  | -1.083767 | -1.034977 |
| O | 3.041359  | -0.364780 | -2.070544 | O | 2.889694  | -0.382636 | -1.984810 |
| N | 3.136038  | -2.514769 | -1.303270 | N | 3.182879  | -2.464406 | -1.090272 |
| H | 2.827759  | -2.819429 | -2.222392 | H | 2.849669  | -2.850578 | -1.969080 |
| C | 2.551896  | 2.532898  | -0.241589 | C | 2.311361  | 2.605487  | -0.314700 |
| H | 2.719936  | 3.348120  | 0.476723  | H | 2.472224  | 3.467730  | 0.348470  |
| C | 3.921663  | -1.686633 | 1.108526  | C | 4.038236  | -1.424787 | 1.212974  |
| H | 4.232016  | -1.263567 | 2.057913  | H | 4.368708  | -0.918741 | 2.113534  |
| C | -2.023160 | 3.150901  | 0.859174  | C | -2.232927 | 3.096911  | 0.980415  |
| H | -1.539321 | 3.826327  | 1.572774  | H | -1.713652 | 3.755355  | 1.684989  |
| C | -2.189554 | 1.797431  | 1.550585  | C | -2.392940 | 1.734017  | 1.659978  |
| C | -2.657903 | 0.681077  | 0.843498  | C | -2.878364 | 0.641537  | 0.949749  |
| C | -1.894298 | 1.656008  | 2.912486  | C | -2.063186 | 1.590051  | 3.023201  |
| C | -2.807576 | -0.563422 | 1.475104  | C | -3.052657 | -0.632275 | 1.576011  |
| H | -2.879409 | 0.773713  | -0.215754 | H | -3.130394 | 0.749972  | -0.102142 |
| C | -2.051316 | 0.422556  | 3.555328  | C | -2.233750 | 0.346673  | 3.657292  |
| H | -1.537438 | 2.514444  | 3.476505  | H | -1.679417 | 2.439373  | 3.581605  |
| C | -2.491435 | -0.687743 | 2.839282  | C | -2.715990 | -0.751538 | 2.963383  |
| H | -1.822221 | 0.332070  | 4.613581  | H | -1.979961 | 0.244761  | 4.710007  |
| H | -2.601751 | -1.652454 | 3.324683  | H | -2.841248 | -1.708434 | 3.461516  |
| C | 3.848405  | 0.682027  | 0.426010  | C | 3.751824  | 0.882291  | 0.390699  |
| H | 4.267900  | 0.694552  | 1.434422  | H | 4.215266  | 0.990953  | 1.374028  |
| C | 3.347758  | -3.515526 | -0.349934 | C | 3.524801  | -3.382405 | -0.092514 |
| O | 3.170606  | -4.699451 | -0.650638 | O | 3.421257  | -4.593304 | -0.308566 |
| C | 3.772183  | -3.025487 | 0.953781  | C | 3.984789  | -2.778280 | 1.149605  |
| C | 4.018735  | -4.013336 | 2.059724  | C | 4.372005  | -3.670461 | 2.295797  |
| H | 4.327632  | -3.503240 | 2.976857  | H | 4.692713  | -3.079672 | 3.158838  |
| H | 3.114801  | -4.594830 | 2.276349  | H | 3.530887  | -4.302738 | 2.603881  |
| H | 4.802079  | -4.728422 | 1.781785  | H | 5.191856  | -4.341391 | 2.012978  |
| C | -1.067094 | 3.012312  | -0.323989 | C | -1.324859 | 2.959691  | -0.236982 |
| O | -1.397839 | 2.962685  | -1.495902 | O | -1.698393 | 2.896944  | -1.396204 |
| O | -2.772193 | -2.890790 | 1.054585  | O | -3.741731 | -2.953199 | 1.290781  |
| C | -3.220478 | -1.790516 | 0.721290  | C | -3.537019 | -1.739656 | 0.859251  |
| C | -4.170434 | -1.688915 | -0.430024 | C | -3.932906 | -1.834150 | -0.577679 |

|   |           |           |           |
|---|-----------|-----------|-----------|
| C | -4.078862 | -2.639576 | -1.462831 |
| C | -5.189642 | -0.721788 | -0.476420 |
| C | -4.973750 | -2.609954 | -2.531103 |
| H | -3.295714 | -3.390520 | -1.420776 |
| C | -6.100187 | -0.708542 | -1.535993 |
| H | -5.289679 | 0.003765  | 0.324840  |
| C | -5.988886 | -1.645394 | -2.567904 |
| H | -4.884209 | -3.337841 | -3.332923 |
| H | -6.894015 | 0.033097  | -1.555302 |
| H | -6.691167 | -1.626783 | -3.397102 |

|   |           |           |           |
|---|-----------|-----------|-----------|
| C | -2.972831 | -2.200247 | -1.554976 |
| C | -5.287132 | -1.645208 | -0.953744 |
| C | -3.336356 | -2.240898 | -2.893933 |
| H | -1.952057 | -2.405728 | -1.248338 |
| C | -5.640816 | -1.689296 | -2.295354 |
| H | -6.026935 | -1.429750 | -0.189285 |
| C | -4.668103 | -1.986323 | -3.265633 |
| H | -2.596276 | -2.475626 | -3.652729 |
| H | -6.667484 | -1.502682 | -2.594928 |
| H | -4.952036 | -2.036807 | -4.312615 |

**P-1- $T_{1,min}$**

|   |           |           |           |
|---|-----------|-----------|-----------|
| C | -3.231122 | 3.911946  | 0.508846  |
| H | -3.857998 | 4.045840  | 1.396263  |
| H | -3.045684 | 4.895784  | 0.064633  |
| H | -3.782984 | 3.307639  | -0.216995 |
| O | 0.297204  | 2.937265  | 0.084896  |
| C | 1.271665  | 2.691428  | -0.957810 |
| H | 0.979850  | 1.803789  | -1.524811 |
| H | 1.302904  | 3.557011  | -1.626862 |
| O | 2.619259  | 1.263259  | 0.440257  |
| C | 3.771986  | 2.386791  | -1.317557 |
| C | 4.745116  | 1.403933  | -0.642988 |
| H | 3.410784  | 1.979597  | -2.265562 |
| H | 5.503924  | 1.976284  | -0.099994 |
| H | 5.251890  | 0.748992  | -1.353695 |
| O | 4.306269  | 3.696106  | -1.518789 |
| H | 4.826508  | 3.698591  | -2.337909 |
| N | 3.686626  | -0.813493 | 0.095322  |
| C | 3.180755  | -1.221097 | -1.133970 |
| O | 2.923644  | -0.450162 | -2.055243 |
| N | 2.992941  | -2.586052 | -1.246459 |
| H | 2.629146  | -2.899979 | -2.141821 |
| C | 2.620869  | 2.492521  | -0.302504 |
| H | 2.830147  | 3.328060  | 0.380552  |
| C | 3.925116  | -1.733374 | 1.103517  |
| H | 4.295945  | -1.300672 | 2.026465  |
| C | -1.909096 | 3.236568  | 0.907646  |
| H | -1.378872 | 3.879657  | 1.618020  |

**P-2- $S_0$**

|   |           |           |           |
|---|-----------|-----------|-----------|
| C | 3.141824  | -3.643695 | 0.980658  |
| H | 3.780989  | -3.607370 | 1.868648  |
| H | 2.922022  | -4.692993 | 0.755542  |
| H | 3.696595  | -3.223406 | 0.136826  |
| O | -0.377930 | -2.780802 | 0.414594  |
| C | -1.367782 | -2.753544 | -0.642270 |
| H | -1.149200 | -1.925651 | -1.321864 |
| H | -1.326083 | -3.697720 | -1.193868 |
| O | -2.843091 | -1.270379 | 0.558255  |
| C | -3.885274 | -2.725275 | -1.011929 |
| C | -4.952715 | -1.771000 | -0.448920 |
| H | -3.567320 | -2.402073 | -2.006615 |
| H | -5.644051 | -2.344680 | 0.176515  |
| H | -5.529460 | -1.267795 | -1.226816 |
| O | -4.282074 | -4.096815 | -1.045173 |
| H | -4.795773 | -4.253714 | -1.853302 |
| N | -4.134735 | 0.620486  | -0.016237 |
| C | -3.682221 | 0.921667  | -1.296181 |
| O | -3.341386 | 0.073147  | -2.116402 |
| N | -3.650767 | 2.273496  | -1.583950 |
| H | -3.325592 | 2.509057  | -2.517413 |
| C | -2.729980 | -2.585975 | -0.006310 |
| H | -2.863141 | -3.335005 | 0.787526  |
| C | -4.485744 | 1.628741  | 0.866694  |
| H | -4.807016 | 1.279267  | 1.841925  |
| C | 1.845485  | -2.860532 | 1.245841  |
| H | 1.313171  | -3.322435 | 2.083623  |

|   |           |           |           |   |           |           |           |
|---|-----------|-----------|-----------|---|-----------|-----------|-----------|
| C | -2.123773 | 1.883166  | 1.587343  | C | 2.103513  | -1.400113 | 1.616854  |
| C | -2.646405 | 0.804652  | 0.875360  | C | 2.704031  | -0.515280 | 0.713588  |
| C | -1.793102 | 1.718627  | 2.947037  | C | 1.766100  | -0.913461 | 2.884273  |
| C | -2.884757 | -0.443351 | 1.505208  | C | 2.939548  | 0.829078  | 1.043377  |
| H | -2.861158 | 0.913678  | -0.183435 | H | 2.975788  | -0.867798 | -0.277648 |
| C | -1.994692 | 0.484894  | 3.576958  | C | 2.020034  | 0.416270  | 3.229028  |
| H | -1.376303 | 2.552653  | 3.505449  | H | 1.307695  | -1.576985 | 3.613937  |
| C | -2.530176 | -0.589908 | 2.875631  | C | 2.591000  | 1.320659  | 2.324615  |
| H | -1.738774 | 0.367692  | 4.626767  | H | 1.763079  | 0.761868  | 4.227643  |
| H | -2.710054 | -1.536145 | 3.375480  | C | -4.175449 | -0.781817 | 0.442752  |
| C | 3.888359  | 0.622611  | 0.372856  | H | -4.621028 | -0.727278 | 1.438642  |
| H | 4.349228  | 0.643131  | 1.362936  | C | -4.001874 | 3.342978  | -0.754493 |
| C | 3.225488  | -3.573426 | -0.284016 | O | -3.914348 | 4.500983  | -1.172788 |
| O | 2.998823  | -4.757347 | -0.549719 | C | -4.451103 | 2.952377  | 0.574098  |
| C | 3.730718  | -3.070214 | 0.985328  | C | -4.848566 | 4.020589  | 1.554162  |
| C | 4.007470  | -4.042248 | 2.098129  | H | -5.164678 | 3.579752  | 2.504171  |
| H | 4.377098  | -3.522580 | 2.986983  | H | -4.014402 | 4.704255  | 1.751653  |
| H | 3.100822  | -4.594004 | 2.373315  | H | -5.674721 | 4.626046  | 1.162854  |
| H | 4.755966  | -4.784278 | 1.795759  | C | 0.907816  | -2.921080 | 0.042533  |
| C | -0.986909 | 3.065105  | -0.297099 | O | 1.257589  | -3.054858 | -1.117525 |
| O | -1.345866 | 3.025101  | -1.461232 | O | 2.974099  | 2.843914  | -0.211051 |
| O | -3.081263 | -2.775799 | 1.260973  | C | 3.487746  | 1.740100  | -0.017049 |
| C | -3.394711 | -1.580090 | 0.770185  | C | 4.650531  | 1.294921  | -0.847435 |
| C | -4.216674 | -1.611007 | -0.423512 | C | 4.842727  | 1.881865  | -2.111558 |
| C | -4.181549 | -2.750446 | -1.276401 | C | 5.586305  | 0.356734  | -0.377732 |
| C | -5.129612 | -0.567452 | -0.730101 | C | 5.937849  | 1.525545  | -2.896301 |
| C | -4.995448 | -2.815196 | -2.404309 | H | 4.121030  | 2.609827  | -2.469277 |
| H | -3.488222 | -3.555979 | -1.057190 | C | 6.694282  | 0.015390  | -1.157218 |
| C | -5.921611 | -0.639219 | -1.869168 | H | 5.461210  | -0.091845 | 0.602739  |
| H | -5.216102 | 0.286465  | -0.065908 | C | 6.867926  | 0.592757  | -2.418714 |
| C | -5.864412 | -1.761885 | -2.714882 | H | 6.070037  | 1.972901  | -3.877706 |
| H | -4.944155 | -3.686867 | -3.051508 | H | 7.418994  | -0.700955 | -0.780157 |
| H | -6.601835 | 0.177011  | -2.098230 | H | 7.724966  | 0.319058  | -3.028406 |
| H | -6.494561 | -1.811917 | -3.598249 | C | 2.826201  | 2.751506  | 2.754226  |
|   |           |           |           | H | 3.800084  | 3.126997  | 2.423688  |
|   |           |           |           | H | 2.068106  | 3.422125  | 2.334618  |
|   |           |           |           | H | 2.781074  | 2.830737  | 3.845028  |

P-2-S<sub>1,min</sub>

P-2-T<sub>1,min</sub>



|   |           |           |           |   |           |           |           |
|---|-----------|-----------|-----------|---|-----------|-----------|-----------|
| C | -3.414409 | 3.757697  | 0.779445  | C | 3.263732  | -3.711019 | 0.995136  |
| H | -4.064001 | 3.785618  | 1.660378  | H | 3.883239  | -3.708481 | 1.897821  |
| H | -3.238196 | 4.786828  | 0.447082  | H | 3.074317  | -4.751461 | 0.708827  |
| H | -3.938992 | 3.225875  | -0.019704 | H | 3.826299  | -3.232449 | 0.188261  |
| O | 0.142100  | 2.913033  | 0.344702  | O | -0.259473 | -2.850186 | 0.398759  |
| C | 1.144529  | 2.804196  | -0.693167 | C | -1.225506 | -2.776227 | -0.676770 |
| H | 0.907860  | 1.955327  | -1.340054 | H | -0.980533 | -1.932409 | -1.327231 |
| H | 1.145561  | 3.723709  | -1.286797 | H | -1.187306 | -3.704202 | -1.255625 |
| O | 2.544438  | 1.322349  | 0.594127  | O | -2.700438 | -1.304493 | 0.537394  |
| C | 3.666303  | 2.668632  | -1.017425 | C | -3.734733 | -2.693819 | -1.096482 |
| C | 4.686665  | 1.697972  | -0.397627 | C | -4.796201 | -1.735549 | -0.528786 |
| H | 3.352186  | 2.317643  | -2.003950 | H | -3.390531 | -2.349738 | -2.075383 |
| H | 5.389645  | 2.270201  | 0.216097  | H | -5.511393 | -2.313467 | 0.065191  |
| H | 5.255639  | 1.141487  | -1.144253 | H | -5.346575 | -1.199541 | -1.303863 |
| O | 4.117713  | 4.021232  | -1.098939 | O | -4.156094 | -4.056158 | -1.175840 |
| H | 4.656742  | 4.122455  | -1.899438 | H | -4.662220 | -4.178988 | -1.994583 |
| N | 3.766436  | -0.640249 | 0.119731  | N | -3.942837 | 0.626616  | -0.009617 |
| C | 3.329138  | -0.977085 | -1.156568 | C | -3.457693 | 0.955204  | -1.270708 |
| O | 3.049394  | -0.151397 | -2.021991 | O | -3.119293 | 0.123777  | -2.109219 |
| N | 3.238599  | -2.337509 | -1.385284 | N | -3.390238 | 2.313944  | -1.516905 |
| H | 2.926499  | -2.599393 | -2.316173 | H | -3.041275 | 2.569810  | -2.436336 |
| C | 2.490232  | 2.615934  | -0.027838 | C | -2.598066 | -2.604617 | -0.064290 |
| H | 2.638830  | 3.392806  | 0.735896  | H | -2.760380 | -3.374294 | 0.703943  |
| C | 4.039033  | -1.623081 | 1.057376  | C | -4.287792 | 1.615952  | 0.896718  |
| H | 4.352124  | -1.245395 | 2.024717  | H | -4.636927 | 1.245134  | 1.854317  |
| C | -2.091364 | 3.062599  | 1.138188  | C | 1.945254  | -2.971623 | 1.273410  |
| H | -1.590077 | 3.634931  | 1.926203  | H | 1.405533  | -3.491515 | 2.071923  |
| C | -2.292587 | 1.639409  | 1.665188  | C | 2.161167  | -1.528107 | 1.733501  |
| C | -2.795494 | 0.639804  | 0.842644  | C | 2.736949  | -0.585729 | 0.884759  |
| C | -1.981294 | 1.331895  | 3.002187  | C | 1.776446  | -1.129642 | 3.022802  |
| C | -3.010589 | -0.695867 | 1.315585  | C | 2.966391  | 0.758515  | 1.290830  |
| H | -3.034226 | 0.868281  | -0.192570 | H | 2.998992  | -0.876620 | -0.127713 |
| C | -2.189330 | 0.028866  | 3.485465  | C | 1.976179  | 0.194718  | 3.432661  |
| H | -1.582235 | 2.098046  | 3.661284  | H | 1.317234  | -1.843568 | 3.701784  |
| C | -2.691630 | -0.996910 | 2.692761  | C | 2.556435  | 1.157952  | 2.606720  |
| H | -1.945759 | -0.190041 | 4.523407  | H | 1.670515  | 0.486559  | 4.435108  |
| C | 3.857647  | 0.777614  | 0.520540  | C | -4.020356 | -0.787330 | 0.407442  |
| H | 4.286177  | 0.746967  | 1.524928  | H | -4.486755 | -0.752402 | 1.394664  |
| C | 3.508439  | -3.383777 | -0.497888 | C | -3.731386 | 3.366057  | -0.661529 |
| O | 3.370615  | -4.553933 | -0.865840 | O | -3.607349 | 4.533712  | -1.042182 |
| C | 3.940882  | -2.955387 | 0.824516  | C | -4.216137 | 2.946620  | 0.645539  |

|   |           |           |           |   |           |           |           |
|---|-----------|-----------|-----------|---|-----------|-----------|-----------|
| C | 4.251698  | -3.996057 | 1.863726  | C | -4.607975 | 3.994069  | 1.649994  |
| H | 4.559711  | -3.528511 | 2.803543  | H | -4.950718 | 3.532486  | 2.580709  |
| H | 3.377387  | -4.627119 | 2.062573  | H | -3.762903 | 4.652890  | 1.882384  |
| H | 5.057354  | -4.659681 | 1.527909  | H | -5.413587 | 4.629071  | 1.262647  |
| C | -1.139457 | 3.036225  | -0.052887 | C | 1.034207  | -2.985460 | 0.049598  |
| O | -1.468878 | 3.097824  | -1.225534 | O | 1.405604  | -3.083358 | -1.107659 |
| O | -3.793427 | -2.921644 | 0.618195  | O | 3.607179  | 2.986932  | 0.548884  |
| C | -3.519990 | -1.659664 | 0.427012  | C | 3.553628  | 1.675351  | 0.355278  |
| C | -3.882226 | -1.482355 | -1.015570 | C | 4.265087  | 1.370881  | -0.898567 |
| C | -2.916898 | -1.726335 | -2.022133 | C | 4.056342  | 2.191792  | -2.037843 |
| C | -5.212693 | -1.159622 | -1.376495 | C | 5.229303  | 0.335355  | -0.971364 |
| C | -3.247444 | -1.522919 | -3.356229 | C | 4.744749  | 1.940959  | -3.223381 |
| H | -1.915247 | -2.033550 | -1.737804 | H | 3.331395  | 2.997373  | -1.986339 |
| C | -5.533759 | -0.959042 | -2.713463 | C | 5.894083  | 0.083501  | -2.165566 |
| H | -5.961053 | -1.035636 | -0.599922 | H | 5.440160  | -0.266371 | -0.093044 |
| C | -4.553498 | -1.139434 | -3.703083 | C | 5.659839  | 0.885176  | -3.297119 |
| H | -2.499519 | -1.666940 | -4.130033 | H | 4.561193  | 2.565569  | -4.093305 |
| H | -6.542412 | -0.670744 | -2.993535 | H | 6.610188  | -0.732238 | -2.218365 |
| H | -4.812122 | -0.996781 | -4.748232 | H | 6.194091  | 0.687745  | -4.222137 |
| C | -2.889779 | -2.376992 | 3.269976  | C | 2.752784  | 2.562411  | 3.126150  |
| H | -3.936963 | -2.700038 | 3.210241  | H | 3.812555  | 2.844790  | 3.148906  |
| H | -2.295670 | -3.132187 | 2.739638  | H | 2.234650  | 3.307310  | 2.508171  |
| H | -2.592865 | -2.397475 | 4.324273  | H | 2.360792  | 2.650926  | 4.145032  |

**P-3-S<sub>0</sub>**

|   |           |           |           |
|---|-----------|-----------|-----------|
| C | 2.846981  | -3.922922 | 0.823648  |
| H | 3.540747  | -3.895539 | 1.670040  |
| H | 2.570313  | -4.966298 | 0.636692  |
| H | 3.366387  | -3.545239 | -0.061954 |
| O | -0.661428 | -2.902707 | 0.455713  |
| C | -1.715018 | -2.856836 | -0.536784 |
| H | -1.473458 | -2.101514 | -1.288929 |
| H | -1.793578 | -3.837103 | -1.017187 |
| O | -2.965443 | -1.163126 | 0.638767  |
| C | -4.239708 | -2.622310 | -0.750627 |
| C | -5.168028 | -1.516709 | -0.218713 |
| H | -3.960015 | -2.423260 | -1.788354 |
| H | -5.872102 | -1.960473 | 0.492327  |
| H | -5.739991 | -1.022951 | -1.006192 |

**P-3-S<sub>1,min</sub>**

|   |           |           |           |
|---|-----------|-----------|-----------|
| C | -2.796864 | -4.283998 | -0.561497 |
| H | -3.495469 | -4.373236 | -1.399635 |
| H | -2.453560 | -5.288033 | -0.289046 |
| H | -3.334069 | -3.862979 | 0.293341  |
| O | 0.631614  | -2.969312 | -0.320028 |
| C | 1.680976  | -2.756839 | 0.654770  |
| H | 1.387602  | -1.951436 | 1.333264  |
| H | 1.828913  | -3.678264 | 1.226386  |
| O | 2.807473  | -1.105495 | -0.693678 |
| C | 4.181688  | -2.318317 | 0.826779  |
| C | 5.035491  | -1.222928 | 0.164479  |
| H | 3.888787  | -2.018825 | 1.836458  |
| H | 5.764741  | -1.697846 | -0.499396 |
| H | 5.576159  | -0.607634 | 0.885585  |

|   |           |           |           |   |           |           |           |
|---|-----------|-----------|-----------|---|-----------|-----------|-----------|
| O | -4.772083 | -3.942556 | -0.631557 | O | 4.798467  | -3.606203 | 0.856567  |
| H | -5.359115 | -4.111781 | -1.385516 | H | 5.389487  | -3.652048 | 1.624815  |
| N | -4.080578 | 0.800244  | -0.053398 | N | 3.804569  | 0.988264  | -0.255804 |
| C | -3.675612 | 0.934963  | -1.376679 | C | 3.405394  | 1.254461  | 1.049419  |
| O | -3.476489 | -0.015594 | -2.129003 | O | 3.276415  | 0.390333  | 1.912972  |
| N | -3.518675 | 2.243953  | -1.792504 | N | 3.167706  | 2.591320  | 1.309144  |
| H | -3.227196 | 2.358290  | -2.759211 | H | 2.880759  | 2.802064  | 2.260884  |
| C | -3.010436 | -2.519793 | 0.168514  | C | 2.948925  | -2.400538 | -0.089348 |
| H | -3.154695 | -3.194625 | 1.024276  | H | 3.142378  | -3.147745 | -0.872373 |
| C | -4.262331 | 1.915128  | 0.748687  | C | 3.902984  | 2.008198  | -1.188263 |
| H | -4.556980 | 1.691146  | 1.768262  | H | 4.199586  | 1.682703  | -2.179364 |
| C | 1.604214  | -3.078403 | 1.148811  | C | -1.611591 | -3.394919 | -0.971590 |
| H | 1.108312  | -3.497126 | 2.030736  | H | -1.093385 | -3.859524 | -1.816934 |
| C | 1.941865  | -1.621640 | 1.463994  | C | -2.049307 | -1.997404 | -1.415873 |
| C | 2.524806  | -0.783675 | 0.503312  | C | -2.609186 | -1.106919 | -0.500294 |
| C | 1.691969  | -1.084971 | 2.730332  | C | -1.921049 | -1.619423 | -2.763386 |
| C | 2.831194  | 0.554581  | 0.774227  | C | -3.052052 | 0.184394  | -0.893600 |
| H | 2.727814  | -1.169224 | -0.492570 | H | -2.745495 | -1.422878 | 0.527357  |
| C | 2.013439  | 0.239750  | 3.040106  | C | -2.379949 | -0.366276 | -3.192652 |
| H | 1.244287  | -1.707582 | 3.501420  | H | -1.474742 | -2.300553 | -3.482197 |
| C | 2.576962  | 1.073687  | 2.066402  | C | -2.940355 | 0.509244  | -2.276278 |
| H | 1.818484  | 0.609089  | 4.040037  | H | -2.286652 | -0.073532 | -4.234195 |
| C | -4.242552 | -0.543302 | 0.537810  | C | 4.045647  | -0.402767 | -0.686890 |
| H | -4.623635 | -0.350669 | 1.543290  | H | 4.406557  | -0.308771 | -1.713793 |
| C | -3.698514 | 3.414889  | -1.049713 | C | 3.262191  | 3.673872  | 0.429083  |
| O | -3.513080 | 4.514373  | -1.579158 | O | 3.011144  | 4.814840  | 0.827482  |
| C | -4.101817 | 3.195518  | 0.331926  | C | 3.663107  | 3.316432  | -0.924121 |
| C | -4.316724 | 4.383648  | 1.227326  | C | 3.788713  | 4.399160  | -1.959307 |
| H | -4.617846 | 4.066555  | 2.230067  | H | 4.091784  | 3.982368  | -2.924351 |
| H | -3.401858 | 4.981661  | 1.314569  | H | 2.837179  | 4.926742  | -2.094867 |
| H | -5.095000 | 5.043435  | 0.825791  | H | 4.531276  | 5.147646  | -1.658234 |
| C | 0.588112  | -3.130304 | 0.010146  | C | -0.589669 | -3.277056 | 0.155626  |
| O | 0.853738  | -3.327151 | -1.163365 | O | -0.827809 | -3.418424 | 1.342892  |
| O | 2.746788  | 2.476366  | -0.618164 | O | -4.187593 | 2.238674  | -0.596942 |
| C | 3.335626  | 1.432388  | -0.337167 | C | -3.667230 | 1.161707  | -0.042539 |
| C | 4.536219  | 1.000600  | -1.116993 | C | -3.819417 | 1.095113  | 1.414233  |
| C | 4.762886  | 1.570797  | -2.383379 | C | -4.940842 | 1.718390  | 2.016787  |
| C | 5.466155  | 0.080338  | -0.602487 | C | -2.851108 | 0.499897  | 2.257530  |
| C | 5.888909  | 1.218401  | -3.124315 | C | -5.106678 | 1.701305  | 3.400267  |
| H | 4.043742  | 2.282900  | -2.776171 | H | -5.687705 | 2.191424  | 1.387113  |
| C | 6.602809  | -0.259945 | -1.339922 | C | -3.028998 | 0.487047  | 3.639643  |

|   |          |           |           |   |           |          |           |
|---|----------|-----------|-----------|---|-----------|----------|-----------|
| H | 5.311510 | -0.356958 | 0.378810  | H | -1.942543 | 0.083188 | 1.837160  |
| C | 6.812904 | 0.303180  | -2.602267 | C | -4.157673 | 1.080202 | 4.221407  |
| H | 6.049806 | 1.654208  | -4.106611 | H | -5.982360 | 2.172276 | 3.839796  |
| H | 7.321558 | -0.963880 | -0.929616 | H | -2.272160 | 0.024577 | 4.268147  |
| H | 7.693293 | 0.031731  | -3.178805 | H | -4.288822 | 1.067133 | 5.299880  |
| O | 2.939174 | 2.365112  | 2.292593  | O | -3.371524 | 1.770646 | -2.654390 |
| C | 2.736178 | 2.921742  | 3.594717  | C | -4.482743 | 1.827610 | -3.571383 |
| H | 3.098542 | 3.948273  | 3.531798  | H | -4.768202 | 2.877729 | -3.632230 |
| H | 1.673139 | 2.922833  | 3.861017  | H | -4.161811 | 1.469693 | -4.554885 |
| H | 3.309989 | 2.374210  | 4.351223  | H | -5.312073 | 1.220312 | -3.199081 |

**P-3- $T_{1,\min}$**

|   |           |           |           |
|---|-----------|-----------|-----------|
| C | 3.038802  | -3.983806 | 0.977293  |
| H | 3.700753  | -3.960468 | 1.849033  |
| H | 2.797840  | -5.028984 | 0.753849  |
| H | 3.579478  | -3.568780 | 0.121639  |
| O | -0.472064 | -2.988122 | 0.499286  |
| C | -1.483908 | -2.915872 | -0.533181 |
| H | -1.198733 | -2.159380 | -1.268923 |
| H | -1.562615 | -3.890237 | -1.025551 |
| O | -2.739133 | -1.212712 | 0.620952  |
| C | -3.991392 | -2.609324 | -0.846520 |
| C | -4.917619 | -1.499439 | -0.319458 |
| H | -3.664781 | -2.385230 | -1.865394 |
| H | -5.656818 | -1.947340 | 0.352246  |
| H | -5.449128 | -0.972986 | -1.113937 |
| O | -4.555548 | -3.920264 | -0.789604 |
| H | -5.116639 | -4.052834 | -1.570226 |
| N | -3.794794 | 0.791162  | -0.042465 |
| C | -3.348224 | 0.961431  | -1.348372 |
| O | -3.152081 | 0.033321  | -2.128806 |
| N | -3.145627 | 2.279724  | -1.712002 |
| H | -2.824228 | 2.420251  | -2.665669 |
| C | -2.799198 | -2.559046 | 0.123983  |
| H | -2.996475 | -3.245693 | 0.959690  |
| C | -3.967835 | 1.881567  | 0.794479  |
| H | -4.296887 | 1.629900  | 1.796932  |
| C | 1.763896  | -3.180064 | 1.277677  |
| H | 1.245153  | -3.637352 | 2.126986  |

**P-4- $S_0$**

|   |           |           |           |
|---|-----------|-----------|-----------|
| C | -2.303482 | -4.355086 | -0.580590 |
| H | -3.032203 | -4.384331 | -1.396600 |
| H | -1.905646 | -5.364707 | -0.435356 |
| H | -2.818587 | -4.055282 | 0.336333  |
| O | 1.081702  | -2.949284 | -0.316629 |
| C | 2.165352  | -2.801943 | 0.635440  |
| H | 1.882041  | -2.065973 | 1.392428  |
| H | 2.349250  | -3.767453 | 1.115990  |
| O | 3.210543  | -1.014929 | -0.597939 |
| C | 4.664946  | -2.331455 | 0.745769  |
| C | 5.482665  | -1.183074 | 0.128877  |
| H | 4.412598  | -2.107637 | 1.785820  |
| H | 6.183145  | -1.601354 | -0.600825 |
| H | 6.052193  | -0.618647 | 0.868887  |
| O | 5.289074  | -3.612528 | 0.655799  |
| H | 5.914053  | -3.708587 | 1.391803  |
| N | 4.231998  | 1.047354  | -0.081467 |
| C | 3.914855  | 1.228270  | 1.260684  |
| O | 3.842516  | 0.310881  | 2.074268  |
| N | 3.691278  | 2.544660  | 1.618507  |
| H | 3.463518  | 2.693451  | 2.597545  |
| C | 3.395835  | -2.356215 | -0.122392 |
| H | 3.567919  | -3.026918 | -0.976732 |
| C | 4.266381  | 2.124288  | -0.952802 |
| H | 4.499917  | 1.863617  | -1.979488 |
| C | -1.168080 | -3.378840 | -0.933619 |
| H | -0.663909 | -3.726141 | -1.840590 |

|   |           |           |           |   |           |           |           |
|---|-----------|-----------|-----------|---|-----------|-----------|-----------|
| C | 2.051412  | -1.724092 | 1.649897  | C | -1.682612 | -1.968416 | -1.204165 |
| C | 2.620888  | -0.849528 | 0.723351  | C | -2.277528 | -1.214392 | -0.181304 |
| C | 1.736896  | -1.245292 | 2.929276  | C | -1.582957 | -1.409902 | -2.486175 |
| C | 2.904035  | 0.505579  | 1.038718  | C | -2.777315 | 0.070431  | -0.408153 |
| H | 2.827029  | -1.201571 | -0.282049 | H | -2.354827 | -1.631962 | 0.818741  |
| C | 1.989762  | 0.091259  | 3.275523  | C | -2.070309 | -0.132881 | -2.741464 |
| H | 1.287560  | -1.907102 | 3.664877  | H | -1.120870 | -1.974042 | -3.290706 |
| C | 2.562296  | 0.961253  | 2.353138  | C | -2.661143 | 0.594405  | -1.705772 |
| H | 1.739907  | 0.436538  | 4.272486  | H | -1.993159 | 0.306038  | -3.728589 |
| C | -4.001789 | -0.566932 | 0.498137  | C | 4.449323  | -0.310801 | -0.613220 |
| H | -4.413849 | -0.399886 | 1.495995  | H | 4.754549  | -0.150574 | -1.649870 |
| C | -3.312128 | 3.427946  | -0.931636 | C | 3.725990  | 3.680740  | 0.804087  |
| O | -3.080375 | 4.539717  | -1.415260 | O | 3.498248  | 4.792735  | 1.288856  |
| C | -3.760230 | 3.170951  | 0.429509  | C | 4.039257  | 3.411465  | -0.592105 |
| C | -3.967944 | 4.331436  | 1.362181  | C | 4.093098  | 4.557529  | -1.563310 |
| H | -4.303486 | 3.986180  | 2.344502  | H | 4.328395  | 4.203095  | -2.571137 |
| H | -3.040726 | 4.901416  | 1.494730  | H | 3.134435  | 5.088320  | -1.599177 |
| H | -4.718314 | 5.025791  | 0.965810  | H | 4.854821  | 5.288928  | -1.268145 |
| C | 0.792958  | -3.222355 | 0.101032  | C | -0.110266 | -3.331739 | 0.170483  |
| O | 1.099880  | -3.418003 | -1.062738 | O | -0.311043 | -3.583506 | 1.344874  |
| O | 3.566460  | 2.712053  | 0.300371  | O | -2.539911 | 1.358088  | 1.553883  |
| C | 3.450275  | 1.407256  | 0.072786  | C | -3.336112 | 0.812451  | 0.796619  |
| C | 3.995234  | 1.087918  | -1.259338 | C | -4.793313 | 0.737930  | 1.083070  |
| C | 3.709557  | 1.942624  | -2.352220 | C | -5.297273 | 1.411500  | 2.210574  |
| C | 4.868558  | -0.006048 | -1.461710 | C | -5.671237 | 0.005483  | 0.266023  |
| C | 4.242709  | 1.679056  | -3.613555 | C | -6.655917 | 1.355263  | 2.511827  |
| H | 3.047433  | 2.790263  | -2.207028 | H | -4.613802 | 1.975287  | 2.837604  |
| C | 5.381124  | -0.268504 | -2.729131 | C | -7.032532 | -0.050697 | 0.570934  |
| H | 5.142453  | -0.640720 | -0.624926 | H | -5.296189 | -0.524165 | -0.604573 |
| C | 5.074211  | 0.571405  | -3.811195 | C | -7.526047 | 0.623759  | 1.692041  |
| H | 4.001620  | 2.335570  | -4.445327 | H | -7.040044 | 1.879436  | 3.382495  |
| H | 6.034710  | -1.124642 | -2.874534 | H | -7.705188 | -0.619926 | -0.064284 |
| H | 5.485505  | 0.364100  | -4.795148 | H | -8.585793 | 0.580040  | 1.928600  |
| O | 2.848169  | 2.269959  | 2.613731  | N | -3.156993 | 1.937160  | -2.005711 |
| C | 2.372202  | 2.863598  | 3.824711  | O | -3.650921 | 2.592561  | -1.080876 |
| H | 2.641457  | 3.918400  | 3.760736  | O | -3.062714 | 2.358087  | -3.161937 |
| H | 1.284481  | 2.760180  | 3.908474  |   |           |           |           |
| H | 2.860498  | 2.412937  | 4.696295  |   |           |           |           |

P-4- $S_{1,min}$ 

|   |           |           |           |
|---|-----------|-----------|-----------|
| C | 3.029724  | 3.994168  | -0.935530 |
| H | 3.765975  | 3.948792  | -1.744152 |
| H | 2.748644  | 5.041169  | -0.781151 |
| H | 3.499748  | 3.629391  | -0.017662 |
| O | -0.491464 | 2.933737  | -0.727486 |
| C | -1.602119 | 2.908991  | 0.202938  |
| H | -1.369396 | 2.233028  | 1.029463  |
| H | -1.760353 | 3.919796  | 0.591476  |
| O | -2.683824 | 1.053218  | -0.887514 |
| C | -4.122474 | 2.553018  | 0.276287  |
| C | -4.960279 | 1.365576  | -0.229319 |
| H | -3.908128 | 2.445441  | 1.342747  |
| H | -5.625326 | 1.717186  | -1.024549 |
| H | -5.569750 | 0.908584  | 0.552057  |
| O | -4.702001 | 3.832662  | 0.018701  |
| H | -5.347687 | 4.029569  | 0.715839  |
| N | -3.765805 | -0.902734 | -0.126780 |
| C | -3.471792 | -0.917083 | 1.232164  |
| O | -3.379864 | 0.095990  | 1.921040  |
| N | -3.294476 | -2.181524 | 1.761758  |
| H | -3.086683 | -2.208217 | 2.756039  |
| C | -2.829023 | 2.441243  | -0.548237 |
| H | -2.948001 | 3.030051  | -1.469037 |
| C | -3.820905 | -2.082232 | -0.852017 |
| H | -4.032249 | -1.950229 | -1.907658 |
| C | 1.798010  | 3.154087  | -1.310160 |
| H | 1.350597  | 3.563457  | -2.221779 |
| C | 2.142048  | 1.693356  | -1.588603 |
| C | 2.669267  | 0.872920  | -0.600132 |
| C | 1.948995  | 1.139115  | -2.872537 |
| C | 3.025387  | -0.480252 | -0.820670 |
| H | 2.830960  | 1.285299  | 0.388543  |
| C | 2.299788  | -0.166428 | -3.151315 |
| H | 1.529064  | 1.751128  | -3.666175 |
| C | 2.858549  | -1.003110 | -2.154078 |
| H | 2.163556  | -0.570642 | -4.145369 |
| C | -3.938422 | 0.381719  | -0.833438 |
| H | -4.231247 | 0.095334  | -1.846030 |
| C | -3.350812 | -3.412247 | 1.100283  |
| O | -3.161848 | -4.457739 | 1.728408  |
| C | -3.637345 | -3.317723 | -0.324055 |
| C | -3.713900 | -4.579028 | -1.138274 |

P-4- $T_{1,min}$ 

|   |           |           |           |
|---|-----------|-----------|-----------|
| C | -2.716417 | -3.891375 | -1.305414 |
| H | -3.379505 | -3.779401 | -2.168924 |
| H | -2.418609 | -4.942623 | -1.231833 |
| H | -3.274643 | -3.631401 | -0.401611 |
| O | 0.749626  | -2.875405 | -0.676015 |
| C | 1.759171  | -2.900236 | 0.363811  |
| H | 1.490030  | -2.183997 | 1.144445  |
| H | 1.804636  | -3.906348 | 0.791490  |
| O | 3.069936  | -1.168349 | -0.681853 |
| C | 4.270267  | -2.686511 | 0.708512  |
| C | 5.229760  | -1.570259 | 0.260358  |
| H | 3.941663  | -2.520325 | 1.737765  |
| H | 5.965312  | -1.994586 | -0.430367 |
| H | 5.765059  | -1.107734 | 1.091300  |
| O | 4.798910  | -4.006063 | 0.569667  |
| H | 5.346484  | -4.206635 | 1.345270  |
| N | 4.169677  | 0.761284  | 0.116692  |
| C | 3.707065  | 0.859574  | 1.424231  |
| O | 3.469551  | -0.111576 | 2.138154  |
| N | 3.538951  | 2.156722  | 1.871375  |
| H | 3.206841  | 2.244584  | 2.827691  |
| C | 3.087739  | -2.542222 | -0.264818 |
| H | 3.270935  | -3.184164 | -1.138296 |
| C | 4.390176  | 1.897985  | -0.644295 |
| H | 4.727588  | 1.702024  | -1.656372 |
| C | -1.480421 | -2.993084 | -1.481271 |
| H | -0.936918 | -3.300929 | -2.379873 |
| C | -1.845435 | -1.520263 | -1.646682 |
| C | -2.493857 | -0.817630 | -0.619188 |
| C | -1.545778 | -0.838938 | -2.834596 |
| C | -2.832306 | 0.534130  | -0.736422 |
| H | -2.711139 | -1.323910 | 0.316332  |
| C | -1.890675 | 0.497988  | -3.001919 |
| H | -1.048408 | -1.360013 | -3.647584 |
| C | -2.533045 | 1.183529  | -1.959510 |
| H | -1.681955 | 1.010035  | -3.934245 |
| C | 4.347487  | -0.564915 | -0.506311 |
| H | 4.774782  | -0.347075 | -1.487670 |
| C | 3.756507  | 3.347823  | 1.171774  |
| O | 3.554278  | 4.432451  | 1.724984  |
| C | 4.216982  | 3.166509  | -0.197541 |
| C | 4.474214  | 4.379118  | -1.047837 |

|   |           |           |           |   |           |           |           |
|---|-----------|-----------|-----------|---|-----------|-----------|-----------|
| H | -3.938398 | -4.354501 | -2.185123 | H | 4.814055  | 4.090024  | -2.046679 |
| H | -2.767556 | -5.131363 | -1.099001 | H | 3.566729  | 4.985183  | -1.154227 |
| H | -4.492896 | -5.248231 | -0.754167 | H | 5.238914  | 5.021820  | -0.595743 |
| C | 0.721206  | 3.227790  | -0.227094 | C | -0.514125 | -3.142090 | -0.305451 |
| O | 0.919103  | 3.494931  | 0.944980  | O | -0.835118 | -3.436574 | 0.832315  |
| O | 4.058902  | -2.365829 | 0.241053  | O | -2.798410 | 2.342774  | 0.782119  |
| C | 3.559984  | -1.220610 | 0.307004  | C | -3.328713 | 1.272354  | 0.476070  |
| C | 3.569878  | -0.681171 | 1.707200  | C | -4.405583 | 0.677010  | 1.313376  |
| C | 4.789952  | -0.645849 | 2.403431  | C | -4.529929 | 1.098581  | 2.650569  |
| C | 2.374573  | -0.322433 | 2.352619  | C | -5.331579 | -0.243957 | 0.791231  |
| C | 4.818535  | -0.200295 | 3.725354  | C | -5.550216 | 0.595286  | 3.453930  |
| H | 5.705980  | -0.945434 | 1.903883  | H | -3.815569 | 1.813073  | 3.047399  |
| C | 2.411902  | 0.102987  | 3.680593  | C | -6.363796 | -0.732999 | 1.594257  |
| H | 1.427493  | -0.381811 | 1.825382  | H | -5.261558 | -0.561382 | -0.244398 |
| C | 3.631457  | 0.171161  | 4.364936  | C | -6.470472 | -0.320225 | 2.925982  |
| H | 5.764693  | -0.150672 | 4.256212  | H | -5.632131 | 0.914486  | 4.489138  |
| H | 1.488801  | 0.382607  | 4.179824  | H | -7.082754 | -1.434418 | 1.180606  |
| H | 3.654239  | 0.509003  | 5.397148  | H | -7.269388 | -0.708314 | 3.552078  |
| N | 3.211230  | -2.279379 | -2.562987 | N | -2.850247 | 2.529528  | -2.173317 |
| O | 3.801623  | -3.131068 | -1.765789 | O | -3.764732 | 3.207120  | -1.516548 |
| O | 2.999142  | -2.689565 | -3.746494 | O | -2.725448 | 3.129144  | -3.323574 |

**P-5-S<sub>0</sub>**

|   |           |           |           |
|---|-----------|-----------|-----------|
| C | 2.915282  | -3.751657 | 1.088619  |
| H | 3.456566  | -3.825898 | 2.037213  |
| H | 2.737753  | -4.764619 | 0.711553  |
| H | 3.548801  | -3.226149 | 0.368207  |
| O | -0.538154 | -2.811608 | 0.265468  |
| C | -1.410692 | -2.642763 | -0.878350 |
| H | -1.113024 | -1.747489 | -1.430661 |
| H | -1.319874 | -3.518267 | -1.528423 |
| O | -2.984660 | -1.278749 | 0.335719  |
| C | -3.874007 | -2.502529 | -1.501865 |
| C | -4.982236 | -1.595726 | -0.938812 |
| H | -3.447259 | -2.068608 | -2.410022 |
| H | -5.744768 | -2.223040 | -0.466537 |
| H | -5.464586 | -0.985189 | -1.703915 |
| O | -4.284105 | -3.848386 | -1.746855 |
| H | -4.719285 | -3.889415 | -2.613209 |
| N | -4.184168 | 0.701173  | -0.122087 |
| C | -3.604635 | 1.149633  | -1.304048 |

**P-5-S<sub>1,min</sub>**

|   |           |           |           |
|---|-----------|-----------|-----------|
| C | -3.120028 | 4.032006  | 0.633809  |
| H | -3.653107 | 4.267998  | 1.560581  |
| H | -2.955490 | 4.964614  | 0.082690  |
| H | -3.756469 | 3.383338  | 0.024900  |
| O | 0.326453  | 2.923085  | -0.033112 |
| C | 1.187962  | 2.570459  | -1.141049 |
| H | 0.860358  | 1.618767  | -1.567981 |
| H | 1.124559  | 3.351560  | -1.905021 |
| O | 2.728271  | 1.320005  | 0.229758  |
| C | 3.648622  | 2.291709  | -1.735995 |
| C | 4.740195  | 1.447520  | -1.055696 |
| H | 3.215748  | 1.750955  | -2.581949 |
| H | 5.509153  | 2.118670  | -0.660054 |
| H | 5.217679  | 0.738498  | -1.733953 |
| O | 4.081494  | 3.587841  | -2.150841 |
| H | 4.524123  | 3.509421  | -3.010821 |
| N | 3.905772  | -0.716388 | 0.040168  |
| C | 3.332417  | -1.305567 | -1.081461 |

|   |           |           |           |   |           |           |           |
|---|-----------|-----------|-----------|---|-----------|-----------|-----------|
| O | -3.201624 | 0.403170  | -2.192547 | O | 2.945969  | -0.674299 | -2.061800 |
| N | -3.521950 | 2.525547  | -1.409327 | N | 3.235693  | -2.682939 | -1.012430 |
| H | -3.105026 | 2.868784  | -2.270088 | H | 2.824718  | -3.128461 | -1.827965 |
| C | -2.830644 | -2.518550 | -0.371867 | C | 2.604950  | 2.470368  | -0.621013 |
| H | -3.058074 | -3.354725 | 0.304961  | H | 2.854332  | 3.375749  | -0.048823 |
| C | -4.591291 | 1.598117  | 0.852431  | C | 4.295377  | -1.486755 | 1.123776  |
| H | -5.007463 | 1.135899  | 1.740994  | H | 4.709096  | -0.920538 | 1.951080  |
| C | 1.585022  | -3.013083 | 1.309823  | C | -1.784082 | 3.349839  | 0.968672  |
| H | 0.975777  | -3.578322 | 2.022533  | H | -1.171091 | 4.038450  | 1.560020  |
| C | 1.780416  | -1.609181 | 1.884429  | C | -1.961648 | 2.071822  | 1.793546  |
| C | 2.440969  | -0.615368 | 1.148150  | C | -2.598518 | 0.961288  | 1.250239  |
| C | 1.313708  | -1.297791 | 3.167916  | C | -1.489545 | 2.026701  | 3.121325  |
| C | 2.616029  | 0.675086  | 1.671176  | C | -2.790931 | -0.233216 | 2.013480  |
| H | 2.795333  | -0.839089 | 0.146277  | H | -2.959015 | 0.994233  | 0.225003  |
| C | 1.491724  | -0.016833 | 3.703257  | C | -1.673107 | 0.862365  | 3.888871  |
| H | 0.805799  | -2.059785 | 3.754087  | H | -0.987001 | 2.889840  | 3.548944  |
| C | 2.126363  | 0.971615  | 2.954976  | C | -2.307083 | -0.251414 | 3.361964  |
| H | 1.127443  | 0.206363  | 4.702317  | H | -1.309000 | 0.835732  | 4.913575  |
| H | 2.255485  | 1.972554  | 3.355024  | H | -2.442023 | -1.146032 | 3.962704  |
| C | -4.291616 | -0.745824 | 0.146637  | C | 4.029825  | 0.751526  | 0.123218  |
| H | -4.839440 | -0.805514 | 1.089911  | H | 4.571133  | 0.925036  | 1.056175  |
| C | -3.923271 | 3.490035  | -0.479874 | C | 3.620078  | -3.525991 | 0.034747  |
| O | -3.772740 | 4.688723  | -0.732796 | O | 3.460371  | -4.745778 | -0.066834 |
| C | -4.499700 | 2.946471  | 0.741600  | C | 4.191068  | -2.837455 | 1.183321  |
| C | -4.958900 | 3.892591  | 1.815688  | C | 4.631478  | -3.642996 | 2.373613  |
| H | -5.364507 | 3.344645  | 2.671261  | H | 5.035320  | -2.993310 | 3.155671  |
| H | -4.131179 | 4.519283  | 2.168173  | H | 3.794551  | -4.211877 | 2.795652  |
| H | -5.735812 | 4.568523  | 1.439110  | H | 5.404759  | -4.368335 | 2.094023  |
| C | 0.779111  | -2.924463 | 0.015827  | C | -0.990249 | 3.038253  | -0.295419 |
| O | 1.249602  | -2.928405 | -1.108551 | O | -1.461374 | 2.890533  | -1.410596 |
| O | 2.828302  | 2.933927  | 1.005565  | O | -3.675557 | -2.506084 | 2.032515  |
| C | 3.241225  | 1.777776  | 0.870257  | C | -3.432577 | -1.358328 | 1.465024  |
| C | 4.351987  | 1.483961  | -0.081549 | C | -3.996002 | -1.540289 | 0.097798  |
| C | 4.543960  | 2.337330  | -1.185002 | C | -3.199342 | -2.096685 | -0.938243 |
| C | 5.259369  | 0.430576  | 0.118077  | C | -5.365298 | -1.262054 | -0.157310 |
| C | 5.595901  | 2.126306  | -2.069597 | C | -3.719516 | -2.235734 | -2.212265 |
| H | 3.852269  | 3.159471  | -1.342540 | H | -2.171051 | -2.373063 | -0.727138 |
| C | 6.326951  | 0.239069  | -0.761816 | C | -5.873979 | -1.405283 | -1.435561 |
| H | 5.153729  | -0.226811 | 0.975490  | H | -5.993265 | -0.900801 | 0.651035  |
| C | 6.509637  | 1.073372  | -1.873784 | C | -5.063936 | -1.890988 | -2.489681 |
| H | 5.717092  | 2.786951  | -2.925299 | H | -3.093659 | -2.620226 | -3.012667 |



|   |          |           |           |   |           |           |           |
|---|----------|-----------|-----------|---|-----------|-----------|-----------|
| H | 7.027658 | -0.572225 | -0.579729 | H | -6.910502 | -1.149624 | -1.636598 |
| C | 7.646659 | 0.853250  | -2.842113 | C | -5.617559 | -2.029951 | -3.876987 |
| H | 7.268450 | 0.560349  | -3.829986 | H | -5.458702 | -1.095530 | -4.435145 |
| H | 8.230967 | 1.770740  | -2.981860 | H | -5.116868 | -2.828423 | -4.432916 |
| H | 8.323090 | 0.066646  | -2.494091 | H | -6.694978 | -2.220661 | -3.864240 |

**P-5- $T_{1,min}$**

|   |           |           |           |
|---|-----------|-----------|-----------|
| C | 2.886266  | -3.936985 | 1.052710  |
| H | 3.396330  | -4.066861 | 2.012674  |
| H | 2.699246  | -4.927588 | 0.623828  |
| H | 3.553072  | -3.393070 | 0.377402  |
| O | -0.515351 | -2.859884 | 0.172946  |
| C | -1.347233 | -2.616898 | -0.986814 |
| H | -1.008190 | -1.708032 | -1.491248 |
| H | -1.262031 | -3.465652 | -1.672205 |
| O | -2.920510 | -1.256921 | 0.232014  |
| C | -3.791495 | -2.387034 | -1.667948 |
| C | -4.903769 | -1.499682 | -1.081929 |
| H | -3.338110 | -1.908700 | -2.540510 |
| H | -5.681305 | -2.142852 | -0.657760 |
| H | -5.364247 | -0.845905 | -1.824272 |
| O | -4.208285 | -3.712983 | -1.995013 |
| H | -4.628162 | -3.701887 | -2.869776 |
| N | -4.114456 | 0.745269  | -0.122854 |
| C | -3.526095 | 1.261136  | -1.272752 |
| O | -3.120982 | 0.567687  | -2.202092 |
| N | -3.437758 | 2.640682  | -1.294916 |
| H | -3.015413 | 3.033040  | -2.131695 |
| C | -2.777346 | -2.474041 | -0.515438 |
| H | -3.043772 | -3.329180 | 0.122798  |
| C | -4.524078 | 1.584003  | 0.901184  |
| H | -4.948042 | 1.071319  | 1.757810  |
| C | 1.567102  | -3.177789 | 1.268558  |
| H | 0.922404  | -3.763181 | 1.932361  |
| C | 1.773516  | -1.808454 | 1.920829  |
| C | 2.468487  | -0.800417 | 1.252355  |
| C | 1.260778  | -1.558645 | 3.206892  |
| C | 2.690197  | 0.465936  | 1.853529  |
| H | 2.829718  | -0.979472 | 0.243860  |

**P-6- $S_0$**

|   |           |           |           |
|---|-----------|-----------|-----------|
| C | 2.446081  | -4.094884 | 0.891287  |
| H | 2.937037  | -4.303205 | 1.847272  |
| H | 2.251702  | -5.047761 | 0.387316  |
| H | 3.132523  | -3.513749 | 0.268637  |
| O | -0.923817 | -2.893635 | 0.039593  |
| C | -1.733137 | -2.559824 | -1.114354 |
| H | -1.348547 | -1.645802 | -1.574340 |
| H | -1.679477 | -3.380710 | -1.836071 |
| O | -3.253214 | -1.183357 | 0.152862  |
| C | -4.154941 | -2.189786 | -1.806343 |
| C | -5.218646 | -1.254246 | -1.206006 |
| H | -3.664934 | -1.715833 | -2.660981 |
| H | -6.037801 | -1.861671 | -0.808155 |
| H | -5.631613 | -0.553605 | -1.933567 |
| O | -4.647119 | -3.478786 | -2.175035 |
| H | -5.052185 | -3.418758 | -3.054817 |
| N | -4.291640 | 0.908930  | -0.184147 |
| C | -3.642167 | 1.404960  | -1.309309 |
| O | -3.262032 | 0.702593  | -2.242662 |
| N | -3.460447 | 2.775365  | -1.301957 |
| H | -2.992242 | 3.153375  | -2.120754 |
| C | -3.159803 | -2.371642 | -0.647992 |
| H | -3.472365 | -3.239537 | -0.049578 |
| C | -4.667351 | 1.754326  | 0.847172  |
| H | -5.144422 | 1.255714  | 1.683923  |
| C | 1.133662  | -3.333755 | 1.140270  |
| H | 0.470406  | -3.954342 | 1.751602  |
| C | 1.351305  | -2.018486 | 1.889518  |
| C | 2.064454  | -0.964474 | 1.300690  |
| C | 0.854645  | -1.852383 | 3.188674  |
| C | 2.262071  | 0.245243  | 1.983806  |
| H | 2.442643  | -1.074832 | 0.288474  |

|   |           |           |           |   |           |           |           |
|---|-----------|-----------|-----------|---|-----------|-----------|-----------|
| C | 1.452929  | -0.306921 | 3.807580  | C | 1.055245  | -0.653995 | 3.883350  |
| H | 0.711263  | -2.336065 | 3.731310  | H | 0.305422  | -2.662987 | 3.661686  |
| C | 2.153338  | 0.697655  | 3.150137  | C | 1.742251  | 0.397328  | 3.280695  |
| H | 1.054345  | -0.120909 | 4.801893  | H | 0.667076  | -0.543175 | 4.892192  |
| H | 2.311262  | 1.659262  | 3.629154  | H | 1.888143  | 1.336624  | 3.805221  |
| C | -4.226325 | -0.713721 | 0.059488  | C | -4.511124 | -0.542673 | -0.035195 |
| H | -4.785727 | -0.828575 | 0.990870  | H | -5.097247 | -0.633921 | 0.882156  |
| C | -3.840329 | 3.549415  | -0.311455 | C | -3.824843 | 3.691241  | -0.310130 |
| O | -3.683174 | 4.760523  | -0.490851 | O | -3.582696 | 4.892009  | -0.462192 |
| C | -4.426309 | 2.936101  | 0.871833  | C | -4.478593 | 3.097107  | 0.847165  |
| C | -4.888183 | 3.817795  | 1.998242  | C | -4.908235 | 3.986445  | 1.980362  |
| H | -5.297993 | 3.220668  | 2.818124  | H | -5.379573 | 3.402858  | 2.776611  |
| H | -4.060708 | 4.420619  | 2.390605  | H | -4.052172 | 4.523054  | 2.406239  |
| H | -5.662434 | 4.516401  | 1.659501  | H | -5.623779 | 4.743264  | 1.637460  |
| C | 0.805463  | -3.007431 | -0.042724 | C | 0.394989  | -3.060820 | -0.168003 |
| O | 1.307113  | -2.982660 | -1.153629 | O | 0.915256  | -2.978138 | -1.267111 |
| O | 3.326493  | 2.765714  | 1.617987  | O | 2.529897  | 2.559398  | 1.584501  |
| C | 3.375753  | 1.522549  | 1.159729  | C | 2.940537  | 1.418761  | 1.339785  |
| C | 4.288870  | 1.439065  | 0.026247  | C | 4.088886  | 1.211314  | 0.418723  |
| C | 4.359411  | 2.514931  | -0.905747 | C | 4.377364  | 2.198774  | -0.538913 |
| C | 5.201162  | 0.359524  | -0.131469 | C | 4.947765  | 0.095692  | 0.505523  |
| C | 5.249576  | 2.471352  | -1.972780 | C | 5.464683  | 2.082553  | -1.401112 |
| H | 3.684148  | 3.356246  | -0.793103 | H | 3.727710  | 3.065566  | -0.612113 |
| C | 6.064501  | 0.325545  | -1.212237 | C | 6.048297  | -0.023199 | -0.332087 |
| H | 5.215662  | -0.443829 | 0.598043  | H | 4.771975  | -0.671837 | 1.252352  |
| C | 6.113664  | 1.379578  | -2.159317 | C | 6.311212  | 0.964782  | -1.297878 |
| H | 5.268975  | 3.295046  | -2.682261 | H | 5.644734  | 2.854866  | -2.139700 |
| H | 6.733577  | -0.523917 | -1.330791 | H | 6.719367  | -0.873421 | -0.254633 |
| C | 7.065312  | 1.313575  | -3.324011 | O | 7.401146  | 0.753892  | -2.079615 |
| H | 6.779424  | 0.512296  | -4.019025 | C | 7.738776  | 1.724202  | -3.078639 |
| H | 7.082121  | 2.253949  | -3.882947 | H | 8.636033  | 1.341241  | -3.565226 |
| H | 8.086681  | 1.092502  | -2.989314 | H | 6.933854  | 1.824265  | -3.815067 |
|   |           |           |           | H | 7.952675  | 2.697068  | -2.622491 |

**P-6-S<sub>1,min</sub>**

|   |           |          |          |
|---|-----------|----------|----------|
| C | -3.086389 | 4.066248 | 0.699863 |
| H | -3.590832 | 4.311447 | 1.640221 |
| H | -2.942794 | 4.992991 | 0.132960 |
| H | -3.739425 | 3.407602 | 0.119737 |

**P-6-T<sub>1,min</sub>**

|   |          |           |          |
|---|----------|-----------|----------|
| C | 2.345660 | -4.389434 | 0.680251 |
| H | 2.782644 | -4.711492 | 1.631029 |
| H | 2.135410 | -5.279771 | 0.077346 |
| H | 3.084633 | -3.783321 | 0.148089 |

|   |           |           |           |   |           |           |           |
|---|-----------|-----------|-----------|---|-----------|-----------|-----------|
| O | 0.340357  | 2.946136  | -0.057144 | O | -0.922970 | -2.936615 | -0.184063 |
| C | 1.165222  | 2.570554  | -1.184740 | C | -1.658783 | -2.448195 | -1.330858 |
| H | 0.815257  | 1.617081  | -1.589562 | H | -1.215034 | -1.509599 | -1.673586 |
| H | 1.088524  | 3.342126  | -1.957188 | H | -1.603434 | -3.190227 | -2.133376 |
| O | 2.727560  | 1.330148  | 0.170062  | O | -3.184755 | -1.145214 | 0.006233  |
| C | 3.599787  | 2.237278  | -1.849120 | C | -4.022841 | -1.892514 | -2.092145 |
| C | 4.694246  | 1.380708  | -1.188671 | C | -5.075264 | -0.973363 | -1.447576 |
| H | 3.128399  | 1.691214  | -2.670634 | H | -3.467965 | -1.356637 | -2.866880 |
| H | 5.492037  | 2.040688  | -0.833418 | H | -5.943236 | -1.576526 | -1.163098 |
| H | 5.131343  | 0.647204  | -1.868124 | H | -5.412550 | -0.177435 | -2.113516 |
| O | 4.047506  | 3.515541  | -2.302481 | O | -4.550689 | -3.110043 | -2.620256 |
| H | 4.449445  | 3.413503  | -3.179767 | H | -4.897283 | -2.940609 | -3.510627 |
| N | 3.843881  | -0.739361 | -0.018561 | N | -4.117328 | 1.016721  | -0.141490 |
| C | 3.221811  | -1.336346 | -1.109601 | C | -3.387528 | 1.603012  | -1.169919 |
| O | 2.824277  | -0.715708 | -2.092380 | O | -2.988259 | 0.991761  | -2.157801 |
| N | 3.089305  | -2.708588 | -1.006802 | N | -3.147645 | 2.953544  | -0.997355 |
| H | 2.643994  | -3.160256 | -1.800612 | H | -2.620469 | 3.397708  | -1.743896 |
| C | 2.596014  | 2.460570  | -0.705661 | C | -3.098663 | -2.243963 | -0.914096 |
| H | 2.877709  | 3.375338  | -0.164420 | H | -3.477867 | -3.155280 | -0.429647 |
| C | 4.236548  | -1.495555 | 1.074160  | C | -4.510782 | 1.759007  | 0.960319  |
| H | 4.685389  | -0.922397 | 1.878207  | H | -5.053371 | 1.194586  | 1.710933  |
| C | -1.739099 | 3.390320  | 1.001290  | C | 1.058391  | -3.593349 | 0.948746  |
| H | -1.110096 | 4.086803  | 1.566386  | H | 0.340433  | -4.239161 | 1.465359  |
| C | -1.892003 | 2.122098  | 1.846469  | C | 1.295839  | -2.369634 | 1.837628  |
| C | -2.486141 | 0.982814  | 1.313293  | C | 2.064472  | -1.298614 | 1.381487  |
| C | -1.445750 | 2.118365  | 3.183834  | C | 0.739876  | -2.322769 | 3.129131  |
| C | -2.661493 | -0.204610 | 2.092823  | C | 2.314176  | -0.163688 | 2.198967  |
| H | -2.825648 | 0.989161  | 0.280155  | H | 2.462882  | -1.322591 | 0.370845  |
| C | -1.614288 | 0.962529  | 3.969225  | C | 0.962911  | -1.204097 | 3.945306  |
| H | -0.976271 | 3.003455  | 3.604253  | H | 0.134044  | -3.150109 | 3.489712  |
| C | -2.205350 | -0.178611 | 3.450970  | C | 1.732433  | -0.137040 | 3.497529  |
| H | -1.271301 | 0.965270  | 5.001834  | H | 0.530067  | -1.172247 | 4.942507  |
| H | -2.327468 | -1.065115 | 4.066188  | H | 1.905631  | 0.722000  | 4.138833  |
| C | 4.009392  | 0.726229  | 0.028353  | C | -4.403866 | -0.430650 | -0.169690 |
| H | 4.589170  | 0.903657  | 0.937035  | H | -5.042552 | -0.596936 | 0.700859  |
| C | 3.477124  | -3.538631 | 0.049524  | C | -3.524954 | 3.769525  | 0.073630  |
| O | 3.281772  | -4.755442 | -0.020316 | O | -3.223745 | 4.966555  | 0.071002  |
| C | 4.094947  | -2.840913 | 1.168009  | C | -4.264323 | 3.082514  | 1.122867  |
| C | 4.540416  | -3.632224 | 2.365956  | C | -4.714213 | 3.859666  | 2.328486  |
| H | 4.982302  | -2.978001 | 3.123236  | H | -5.254574 | 3.215268  | 3.028147  |
| H | 3.697629  | -4.166159 | 2.820728  | H | -3.859113 | 4.299740  | 2.855073  |

|   |           |           |           |   |           |           |           |
|---|-----------|-----------|-----------|---|-----------|-----------|-----------|
| H | 5.284853  | -4.386537 | 2.084778  | H | -5.374432 | 4.686252  | 2.040219  |
| C | -0.983227 | 3.066425  | -0.281997 | C | 0.394626  | -3.158521 | -0.354085 |
| O | -1.485804 | 2.912963  | -1.382853 | O | 0.963703  | -3.004079 | -1.421424 |
| O | -3.476370 | -2.500391 | 2.145800  | O | 3.141664  | 2.091198  | 2.408346  |
| C | -3.259599 | -1.363140 | 1.552879  | C | 3.070271  | 0.962564  | 1.728760  |
| C | -3.769031 | -1.549278 | 0.166326  | C | 3.990352  | 1.028676  | 0.595437  |
| C | -5.141554 | -1.319057 | -0.134637 | C | 4.100852  | 2.240742  | -0.152120 |
| C | -2.928204 | -2.091373 | -0.848108 | C | 4.888483  | -0.032969 | 0.276946  |
| C | -5.634631 | -1.499134 | -1.410233 | C | 4.989684  | 2.363944  | -1.207582 |
| H | -5.798579 | -0.961913 | 0.651911  | H | 3.447859  | 3.068964  | 0.099172  |
| C | -3.402966 | -2.276906 | -2.123756 | C | 5.760089  | 0.077555  | -0.783254 |
| H | -1.893924 | -2.319268 | -0.611294 | H | 4.875103  | -0.942435 | 0.868430  |
| C | -4.763414 | -1.978425 | -2.423171 | C | 5.824234  | 1.278444  | -1.541428 |
| H | -6.671824 | -1.277237 | -1.628876 | H | 5.024147  | 3.288616  | -1.771521 |
| H | -2.767979 | -2.644993 | -2.922708 | H | 6.422286  | -0.739918 | -1.052376 |
| O | -5.285766 | -2.177171 | -3.057738 | O | 6.717689  | 1.276628  | -2.548527 |
| C | -6.651738 | -1.893413 | -3.433237 | C | 6.879948  | 2.455555  | -3.354773 |
| H | -6.740963 | -2.247637 | -4.458504 | H | 7.654401  | 2.205343  | -4.078948 |
| H | -7.341934 | -2.437289 | -2.783657 | H | 5.947116  | 2.696989  | -3.874030 |
| H | -6.838501 | -0.817622 | -3.387232 | H | 7.202468  | 3.301017  | -2.739009 |

**P-7-S<sub>0</sub>**

|   |           |           |           |
|---|-----------|-----------|-----------|
| C | 2.330848  | -4.012457 | 1.131040  |
| H | 2.779371  | -4.199508 | 2.111905  |
| H | 2.182189  | -4.974663 | 0.629451  |
| H | 3.033522  | -3.422797 | 0.535119  |
| O | -1.020302 | -2.907392 | 0.102038  |
| C | -1.781260 | -2.593888 | -1.090144 |
| H | -1.387103 | -1.679560 | -1.541157 |
| H | -1.686166 | -3.420872 | -1.800546 |
| O | -3.367066 | -1.228726 | 0.104716  |
| C | -4.173256 | -2.247505 | -1.890179 |
| C | -5.267318 | -1.314121 | -1.342935 |
| H | -3.648660 | -1.775841 | -2.725270 |
| H | -6.101083 | -1.923692 | -0.980260 |
| H | -5.649599 | -0.618528 | -2.091744 |
| O | -4.642375 | -3.540980 | -2.272819 |
| H | -5.009155 | -3.487531 | -3.169663 |
| N | -4.396940 | 0.857592  | -0.289175 |

**P-7-S<sub>1,min</sub>**

|   |           |           |           |
|---|-----------|-----------|-----------|
| C | 4.815756  | -2.903624 | -0.835644 |
| H | 5.549631  | -3.172967 | -0.069428 |
| H | 4.878962  | -3.634849 | -1.648483 |
| H | 5.079301  | -1.920325 | -1.236923 |
| O | 1.119409  | -2.951199 | -0.858349 |
| C | 0.009433  | -2.613024 | -1.725005 |
| H | -0.014728 | -1.529900 | -1.871772 |
| H | 0.146598  | -3.107147 | -2.691517 |
| O | -1.524140 | -2.338322 | 0.116214  |
| C | -2.502959 | -2.917452 | -1.969395 |
| C | -3.635130 | -2.689064 | -0.952915 |
| H | -2.382369 | -2.041299 | -2.612877 |
| H | -4.129166 | -3.645006 | -0.752206 |
| H | -4.386815 | -1.980466 | -1.304473 |
| O | -2.654182 | -4.093506 | -2.764468 |
| H | -3.250636 | -3.896716 | -3.504354 |
| N | -3.221443 | -0.831319 | 0.764741  |

|   |           |           |           |   |           |           |           |
|---|-----------|-----------|-----------|---|-----------|-----------|-----------|
| C | -3.698852 | 1.351590  | -1.385739 | C | -3.043595 | 0.230870  | -0.114912 |
| O | -3.276987 | 0.647345  | -2.299539 | O | -2.660210 | 0.100799  | -1.275325 |
| N | -3.519097 | 2.722230  | -1.373941 | N | -3.340942 | 1.468882  | 0.423477  |
| H | -3.016726 | 3.098819  | -2.172903 | H | -3.229779 | 2.254720  | -0.210921 |
| C | -3.229005 | -2.417957 | -0.688158 | C | -1.266020 | -3.098611 | -1.073753 |
| H | -3.560244 | -3.286936 | -0.101589 | H | -1.170535 | -4.163254 | -0.815170 |
| C | -4.816810 | 1.704861  | 0.723493  | C | -3.623064 | -0.608819 | 2.072207  |
| H | -5.329357 | 1.207662  | 1.539861  | H | -3.706717 | -1.506883 | 2.674508  |
| C | 0.990694  | -3.279956 | 1.307196  | C | 3.406623  | -2.892621 | -0.219750 |
| H | 0.312315  | -3.909722 | 1.891687  | H | 3.176710  | -3.892161 | 0.165903  |
| C | 1.139788  | -1.952369 | 2.051071  | C | 3.297930  | -1.912302 | 0.948216  |
| C | 1.869932  | -0.893605 | 1.494148  | C | 3.190009  | -0.533511 | 0.724024  |
| C | 0.558430  | -1.776783 | 3.313458  | C | 3.335742  | -2.377128 | 2.269474  |
| C | 2.001426  | 0.328068  | 2.173812  | C | 3.131665  | 0.371232  | 1.795309  |
| H | 2.312127  | -1.011786 | 0.509378  | H | 3.170130  | -0.157598 | -0.295154 |
| C | 0.692339  | -0.566389 | 4.004210  | C | 3.291157  | -1.482603 | 3.345042  |
| H | -0.005155 | -2.591157 | 3.762119  | H | 3.403622  | -3.445301 | 2.461300  |
| C | 1.398732  | 0.488743  | 3.434370  | C | 3.199862  | -0.111807 | 3.113072  |
| H | 0.238658  | -0.451270 | 4.984582  | H | 3.322776  | -1.860743 | 4.363105  |
| H | 1.499063  | 1.435783  | 3.955007  | H | 3.165476  | 0.589956  | 3.940695  |
| C | -4.617565 | -0.594317 | -0.144276 | C | -2.926698 | -2.209783 | 0.331194  |
| H | -5.244789 | -0.684034 | 0.745578  | H | -3.214951 | -2.829972 | 1.183253  |
| C | -3.925790 | 3.639853  | -0.400305 | C | -3.764588 | 1.769471  | 1.721849  |
| O | -3.677858 | 4.840414  | -0.544279 | O | -3.986272 | 2.941011  | 2.040807  |
| C | -4.627919 | 3.047631  | 0.729365  | C | -3.903205 | 0.611418  | 2.592976  |
| C | -5.105142 | 3.939071  | 1.841689  | C | -4.343167 | 0.815681  | 4.015799  |
| H | -5.606511 | 3.356573  | 2.620198  | H | -4.403112 | -0.139230 | 4.546178  |
| H | -4.268203 | 4.479184  | 2.299884  | H | -3.644289 | 1.466327  | 4.554676  |
| H | -5.808345 | 4.692968  | 1.468206  | H | -5.327652 | 1.296492  | 4.057924  |
| C | 0.311241  | -3.034112 | -0.038576 | C | 2.344488  | -2.574233 | -1.268742 |
| O | 0.885014  | -2.936478 | -1.109343 | O | 2.551494  | -2.025921 | -2.337292 |
| O | 2.396945  | 2.646711  | 1.870611  | O | 3.635445  | 2.621889  | 2.341734  |
| C | 2.707946  | 1.494838  | 1.568129  | C | 3.057994  | 1.848605  | 1.571829  |
| C | 3.821222  | 1.278708  | 0.578309  | C | 2.276559  | 2.394148  | 0.421853  |
| C | 3.967382  | 2.198113  | -0.474225 | C | 2.638283  | 3.655553  | -0.100261 |
| C | 4.753863  | 0.239395  | 0.727259  | C | 1.151095  | 1.728663  | -0.108879 |
| C | 5.013306  | 2.074265  | -1.382518 | C | 1.926835  | 4.233464  | -1.134901 |
| H | 3.251550  | 3.006493  | -0.579293 | H | 3.496995  | 4.170707  | 0.317025  |
| C | 5.820878  | 0.115836  | -0.160521 | C | 0.403852  | 2.288938  | -1.132402 |
| H | 4.665438  | -0.464305 | 1.548071  | H | 0.839725  | 0.773600  | 0.299738  |
| C | 5.927115  | 1.031924  | -1.207187 | C | 0.802983  | 3.542548  | -1.650914 |

|   |          |           |           |   |           |          |           |
|---|----------|-----------|-----------|---|-----------|----------|-----------|
| H | 5.125544 | 2.768172  | -2.206376 | H | 2.215801  | 5.193736 | -1.547706 |
| H | 6.553515 | -0.673457 | -0.046426 | H | -0.470103 | 1.780217 | -1.526230 |
| N | 7.041373 | 0.898135  | -2.155225 | N | 0.086561  | 4.101198 | -2.666945 |
| O | 7.842282 | -0.025872 | -1.987351 | O | -0.964513 | 3.610248 | -3.251949 |
| O | 7.124985 | 1.715940  | -3.075802 | O | 0.306073  | 5.238836 | -3.253650 |

**P-7-T<sub>1,min</sub>**

|   |           |           |           |
|---|-----------|-----------|-----------|
| C | 2.276165  | -4.066789 | 1.071355  |
| H | 2.729254  | -4.265412 | 2.047858  |
| H | 2.115497  | -5.023734 | 0.563381  |
| H | 2.980368  | -3.478715 | 0.475622  |
| O | -1.070716 | -2.913904 | 0.074990  |
| C | -1.835551 | -2.584248 | -1.110235 |
| H | -1.433050 | -1.672288 | -1.558718 |
| H | -1.755457 | -3.408170 | -1.826041 |
| O | -3.397273 | -1.206557 | 0.102589  |
| C | -4.227652 | -2.203895 | -1.893523 |
| C | -5.306179 | -1.259267 | -1.335030 |
| H | -3.701985 | -1.734829 | -2.729372 |
| H | -6.145382 | -1.859868 | -0.969918 |
| H | -5.684331 | -0.555281 | -2.078103 |
| O | -4.715901 | -3.489201 | -2.279883 |
| H | -5.085415 | -3.426772 | -3.175015 |
| N | -4.399757 | 0.895895  | -0.277910 |
| C | -3.700131 | 1.384278  | -1.375954 |
| O | -3.291536 | 0.677503  | -2.293837 |
| N | -3.502212 | 2.752378  | -1.360509 |
| H | -2.997944 | 3.124868  | -2.160196 |
| C | -3.278457 | -2.392723 | -0.698121 |
| H | -3.616795 | -3.260929 | -0.114478 |
| C | -4.804845 | 1.745428  | 0.738800  |
| H | -5.320338 | 1.252369  | 1.555816  |
| C | 0.944274  | -3.322833 | 1.261998  |
| H | 0.264293  | -3.950148 | 1.847381  |
| C | 1.112595  | -2.002215 | 2.014238  |
| C | 1.832837  | -0.940022 | 1.450317  |
| C | 0.560963  | -1.837603 | 3.291286  |
| C | 1.983606  | 0.275157  | 2.136831  |
| H | 2.250681  | -1.049266 | 0.453752  |

|   |           |           |           |
|---|-----------|-----------|-----------|
| C | 0.714395  | -0.633759 | 3.988963  |
| H | 0.005140  | -2.654492 | 3.745186  |
| C | 1.409678  | 0.425353  | 3.411493  |
| H | 0.283490  | -0.525700 | 4.980449  |
| H | 1.521730  | 1.368236  | 3.937542  |
| C | -4.639834 | -0.553486 | -0.137184 |
| H | -5.263442 | -0.637633 | 0.755753  |
| C | -3.893518 | 3.672254  | -0.382693 |
| O | -3.630723 | 4.869965  | -0.524120 |
| C | -4.599012 | 3.085700  | 0.747820  |
| C | -5.060904 | 3.979662  | 1.864594  |
| H | -5.567345 | 3.401147  | 2.642798  |
| H | -4.215532 | 4.507305  | 2.321847  |
| H | -5.755453 | 4.743874  | 1.495909  |
| C | 0.257495  | -3.062410 | -0.077037 |
| O | 0.823216  | -2.971929 | -1.152765 |
| O | 2.298662  | 2.596597  | 1.788375  |
| C | 2.671223  | 1.451457  | 1.519818  |
| C | 3.814278  | 1.252619  | 0.575785  |
| C | 4.042936  | 2.229949  | -0.415455 |
| C | 4.709967  | 0.171129  | 0.692956  |
| C | 5.113998  | 2.129306  | -1.287316 |
| H | 3.358599  | 3.067770  | -0.497380 |
| C | 5.805562  | 0.056839  | -0.151740 |
| H | 4.566924  | -0.575086 | 1.466978  |
| C | 5.995796  | 1.036174  | -1.146786 |
| H | 5.279105  | 2.870758  | -2.061594 |
| H | 6.504424  | -0.766537 | -0.051836 |
| N | 7.069973  | 0.926165  | -1.998936 |
| O | 7.974571  | -0.014479 | -2.014406 |
| O | 7.398304  | 1.735899  | -2.968093 |
